# Supplementary material for: Phage Genes Induce Quorum Sensing Signal Release through Membrane Vesicle Formation
Source: PubMed Central journal article supplement (PMC8958291; doi:10.1264/jsme2.me21067), 2022-01-27
Supplement: 37_21067_s1.pdf [file 37_21067_s1.pdf]

Table S1. List of strains and plasmids used in this study.

| Strains or Plasmids                    | Relevant characteristics                                     | Source or Reference                |
|----------------------------------------|--------------------------------------------------------------|------------------------------------|
| <b>Strain</b>                          |                                                              |                                    |
| <i>Paracoccus denitrificans</i>        |                                                              |                                    |
| Pd1222                                 | Wild type                                                    | Devries <i>et. al.</i> 1989        |
| ΔPden_0381                             | Pden_0381 deletion mutant                                    | This study                         |
| ΔPden_0382                             | Pden_0382 deletion mutant                                    | This study                         |
| ΔPden_0381ΔPden_0382                   | deletion mutant of Pden_0381 and Pden_0382                   | This study                         |
| Δ <i>recA</i>                          | <i>recA</i> (Pden_0597) deletion mutant                      | Toyofuku <i>et. al.</i> 2017       |
| ΔPden_0381ΔPden_0382/pQF               | ΔPden_0381ΔPden_0382 carrying pQF                            | This study                         |
| ΔPden_0381ΔPden_0382<br>/pQF_0381      | ΔPden_0381ΔPden_0382<br>carrying pQF_0381                    | This study                         |
| ΔPden_0381ΔPden_0382<br>/pQF_0382      | ΔPden_0381ΔPden_0382<br>carrying pQF_0382                    | This study                         |
| ΔPden_0381ΔPden_0382<br>/pQF_0381_0382 | ΔPden_0381ΔPden_0382<br>carrying pQF_0381_0382               | This study                         |
| <i>Chromobacterium violaceum</i>       |                                                              |                                    |
| VIR24                                  | <i>cviI</i> deletion mutant of ATCC12472                     | Someya <i>et. al.</i> 2009         |
| VIR24/pPROBE-P <i>vioA</i> -gfp        | VIR24 carrying pPROBE-P <i>vioA</i> -gfp                     | Toyofuku <i>et. al.</i> 2017       |
| <i>Escherichia coli</i>                |                                                              |                                    |
| DH5α                                   | Cloning host                                                 | TaKaRa                             |
| S17-1                                  | Mobilizer strain for conjugation                             | Simon <i>et. al.</i> 1986          |
| <b>Plasmids</b>                        |                                                              |                                    |
| pK18mobsacB                            | Allelic exchange suicide vector; <i>sacB</i> Km <sup>R</sup> | Schäfer <i>et. al.</i> 1994        |
| pK18mobsacB-ΔPden_0381                 | Pden_0381 deletion cassette in pK18mobsacB                   | This study                         |
| pK18mobsacB-ΔPden_0382_WT              | Pden_0382 deletion cassette for WT<br>in pK18mobsacB         | This study                         |
| pK18mobsacB-<br>ΔPden_0382_ΔPden_0381  | Pden_0382 deletion cassette for ΔPden_0381 in<br>pK18mobsacB | This study                         |
| pQF                                    | Cumate-inducible vector; Tet <sup>R</sup>                    | Kaczmarczyk <i>et. al.</i><br>2013 |
| pQF_0381                               | pQF derivative to induce Pden_0381                           | This study                         |
| pQF_0382                               | pQF derivative to induce Pden_0382                           | This study                         |

pQF\_0381\_0382

pQF derivative to induce Pden\_0381 and Pden\_0382

This study

pPROBE-PvioA-gfp

AHL reporter plasmid

Toyofuku *et. al.* 2017

---

Table S2. Sequence of primers used in this study.

| Primer                       | Sequence<br>5'→3' (restriction enzyme sites are underlined) | Source or<br>Reference |
|------------------------------|-------------------------------------------------------------|------------------------|
| <b>For gene deletion</b>     |                                                             |                        |
| 0381F1                       | ACTTTTGGCTCACGCCTCTA                                        | This study             |
| 0381R1                       | CTGCATGATGATGCTCCTCAGTCGATTCCGTCGATAGGAC                    | This study             |
| 0381F2                       | GTCCTATCGACGGAATCGACTGAGGAGCATCATCATGCAG                    | This study             |
| 0381R2                       | GCCACCAAAGTCGAAAACAT                                        | This study             |
| 0381overF                    | GCC <u>AAGCTT</u> CTTTGGGCCAAGTTCAATTC                      | This study             |
| 0381overR                    | TAC <u>GAAATC</u> CAACTGATCGACGCCAACTG                      | This study             |
| 0382wtF1                     | AAGATCAAGACCAGCGCGAG                                        | This study             |
| 0382wtR1                     | GCATCACGCCGCCCTGCCGCGTTGATGATAGTCTGCA                       | This study             |
| 0382lysF1                    | GCAGTTCTTCGGGACCTTC                                         | This study             |
| 0382lysR1                    | GCATCACGCCGCCCTGCCGCGTTGATGATAGTCTGCA                       | This study             |
| 0382F2                       | TGCAGACTATCATCAACGCGGCAGGGGCGGCGTGATGC                      | This study             |
| 0382R2                       | ATCGTCTCGGATTCGCTCTG                                        | This study             |
| 0382wtoverF                  | CCC <u>AAGCTT</u> TCGACCTCTGGCGATATTGG                      | This study             |
| 0382lysoverF                 | CCC <u>AAGCTT</u> CAGGATACCACCACCACGAC                      | This study             |
| 0382overR                    | CCG <u>GAAATC</u> CAGCAGGGCGGTAAATGATCC                     | This study             |
| <b>For inducible plasmid</b> |                                                             |                        |
| Ind0381F                     | TGACTCTAGAGTGATTTTTTTCATGGAGAGATGAC                         | This study             |
| Ind0381R                     | GCTCGGT <u>ACCT</u> CAGAAGGTGGAAGCTCGC                      | This study             |
| Ind0382F                     | TGACTCTAGAGTGAACCTTCTGAGGAGCATCATC                          | This study             |
| Ind0381R                     | GCTCGGT <u>ACCT</u> CACGCCGCCCTGCCCGCC                      | This study             |
| Ind0381_0382F                | TGACTCTAGAGTGATTTTTTTCATGGAGAGATGAC                         | This study             |
| Ind0381_0382R                | GCTCGGT <u>ACCT</u> CACGCCGCCCTGCCCGCC                      | This study             |

Table S3. Lists of differentially expressed genes between WT with MMC vs. WT without MMC.

| gene_id   | name               | product                                                                                          | PhiSpy_phage_region | logFC | PValue      | FDR         |
|-----------|--------------------|--------------------------------------------------------------------------------------------------|---------------------|-------|-------------|-------------|
| Pden_0002 | <i>rho</i>         | transcription termination factor Rho                                                             |                     | 1.90  | 7.81E-04    | 0.005794672 |
| Pden_0003 | <i>mnmE (trmE)</i> | tRNA modification GTPase trmE                                                                    |                     | 2.39  | 2.60E-05    | 0.001142137 |
| Pden_0010 | <i>rph</i>         | RNAse PH                                                                                         |                     | 1.39  | 4.32E-04    | 0.004092226 |
| Pden_0011 | <i>rdgB</i>        | dITPase                                                                                          |                     | 1.98  | 0.001490927 | 0.008797857 |
| Pden_0012 |                    | Endoribonuclease L-PSP                                                                           |                     | 1.73  | 2.70E-04    | 0.003200601 |
| Pden_0013 |                    | putative oxygen-independent coproporphyrinogen III oxidase                                       |                     | 1.42  | 5.54E-04    | 0.004780002 |
| Pden_0015 | <i>gfa</i>         | glutathione-dependent formaldehyde-activating, GFA                                               |                     | -2.03 | 0.001314887 | 0.008082965 |
| Pden_0020 |                    | Pyrolo-quinoline quinone                                                                         |                     | -5.77 | 1.40E-04    | 0.002302411 |
| Pden_0021 |                    | hypothetical protein                                                                             |                     | -4.68 | 1.63E-05    | 8.87E-04    |
| Pden_0022 |                    | amino acid ABC transporter substrate-binding protein, PAAT family                                |                     | -3.98 | 4.74E-05    | 0.001471351 |
| Pden_0023 |                    | rhodanese                                                                                        |                     | -3.46 | 5.84E-05    | 0.001616929 |
| Pden_0024 |                    | conserved hypothetical protein                                                                   |                     | -2.50 | 2.95E-05    | 0.001194403 |
| Pden_0026 |                    | amino acid/amide ABC transporter substrate-binding protein, HAAT family                          |                     | -4.39 | 2.09E-05    | 9.98E-04    |
| Pden_0027 |                    | 40-residue YVTN family beta-propeller repeat protein                                             |                     | -4.05 | 2.08E-05    | 9.98E-04    |
| Pden_0028 |                    | hypothetical protein                                                                             |                     | -4.64 | 2.69E-04    | 0.003197585 |
| Pden_0029 |                    | ABC transporter related protein                                                                  |                     | -3.27 | 1.08E-04    | 0.002099137 |
| Pden_0030 |                    | ABC-2 type transporter                                                                           |                     | -2.63 | 1.92E-04    | 0.002717725 |
| Pden_0031 |                    | conserved hypothetical protein                                                                   |                     | -1.61 | 5.76E-04    | 0.004898771 |
| Pden_0048 |                    | AMP-dependent synthetase and ligase                                                              |                     | -5.88 | 1.83E-05    | 9.57E-04    |
| Pden_0049 |                    | amino acid/amide ABC transporter ATP-binding protein 1, HAAT family                              |                     | -4.50 | 5.52E-06    | 4.66E-04    |
| Pden_0050 |                    | amino acid/amide ABC transporter membrane protein 1, HAAT family                                 |                     | -3.53 | 1.12E-04    | 0.00214351  |
| Pden_0051 |                    | amino acid/amide ABC transporter membrane protein 2, HAAT family                                 |                     | -3.21 | 6.62E-04    | 0.005254598 |
| Pden_0052 |                    | amino acid/amide ABC transporter substrate-binding protein, HAAT family                          |                     | -4.14 | 2.45E-05    | 0.001107056 |
| Pden_0053 |                    | amino acid/amide ABC transporter ATP-binding protein 2, HAAT family                              |                     | -3.94 | 1.78E-05    | 9.49E-04    |
| Pden_0054 |                    | phenylacetate-CoA ligase, putative                                                               |                     | -2.55 | 1.05E-04    | 0.002060708 |
| Pden_0063 | <i>msrP</i>        | oxidoreductase, molybdopterin binding protein                                                    |                     | -1.38 | 0.001265593 | 0.007871864 |
| Pden_0067 | <i>tnpB</i>        | IS66 Orf2 family protein                                                                         |                     | 4.28  | 1.21E-04    | 0.002215935 |
| Pden_0068 |                    | transposase IS66                                                                                 |                     | 2.56  | 7.86E-05    | 0.001836392 |
| Pden_0077 |                    | transposase                                                                                      |                     | 1.40  | 0.001570019 | 0.009043238 |
| Pden_0087 | <i>pseF</i>        | acylneuraminate cytidyltransferase                                                               |                     | 1.41  | 0.001210589 | 0.007644393 |
| Pden_0088 |                    | flagellin modification protein FlmD                                                              |                     | 1.33  | 9.85E-04    | 0.006721522 |
| Pden_0098 |                    | Conjugal transfer TraD family protein                                                            |                     | -1.63 | 9.56E-04    | 0.006665173 |
| Pden_0099 |                    | conserved hypothetical protein                                                                   |                     | -1.46 | 6.37E-04    | 0.005142188 |
| Pden_0116 | <i>catB</i>        | transferase hexapeptide repeat containing protein                                                |                     | 2.44  | 4.18E-05    | 0.001440403 |
| Pden_0126 |                    | hypothetical protein                                                                             |                     | 1.94  | 6.33E-04    | 0.005126214 |
| Pden_0134 |                    | transposase IS116/IS110/IS902 family protein                                                     |                     | -2.15 | 3.07E-05    | 0.001223584 |
| Pden_0160 |                    | acriflavin resistance protein                                                                    |                     | 1.34  | 5.36E-04    | 0.00465373  |
| Pden_0171 |                    | monooxygenase, FAD-binding protein                                                               |                     | -3.00 | 6.89E-04    | 0.005364018 |
| Pden_0172 |                    | benzoate-CoA ligase family                                                                       |                     | -2.78 | 4.30E-04    | 0.004090524 |
| Pden_0174 | <i>maiA</i>        | maleylacetoacetate isomerase                                                                     |                     | -2.45 | 9.11E-04    | 0.006432915 |
| Pden_0176 |                    | amino acid/amide ABC transporter membrane protein 1, HAAT family                                 |                     | -2.32 | 0.001612855 | 0.009144328 |
| Pden_0177 |                    | amino acid/amide ABC transporter membrane protein 2, HAAT family                                 |                     | -2.49 | 0.001348882 | 0.008228178 |
| Pden_0179 |                    | amino acid/amide ABC transporter ATP-binding protein 2, HAAT family                              |                     | -2.39 | 7.42E-04    | 0.005632016 |
| Pden_0180 |                    | aldehyde dehydrogenase                                                                           |                     | -3.10 | 1.15E-04    | 0.002162073 |
| Pden_0181 |                    | glucose-methanol-choline oxidoreductase                                                          |                     | -3.29 | 4.39E-04    | 0.004136616 |
| Pden_0182 |                    | RNAse Z                                                                                          |                     | -3.36 | 1.77E-04    | 0.002605071 |
| Pden_0185 |                    | conserved hypothetical protein                                                                   |                     | -1.28 | 7.43E-04    | 0.005632016 |
| Pden_0187 |                    | transcriptional regulator, MarR family                                                           |                     | -1.80 | 1.34E-04    | 0.002284871 |
| Pden_0189 |                    | TRAP C4-dicarboxylate transport system permease DctM subunit                                     |                     | -2.58 | 1.81E-04    | 0.002630055 |
| Pden_0190 |                    | Tripartite ATP-independent periplasmic transporter, DctQ component                               |                     | -3.28 | 1.38E-04    | 0.002302411 |
| Pden_0192 |                    | short-chain dehydrogenase/reductase SDR                                                          |                     | -3.26 | 7.97E-05    | 0.001841466 |
| Pden_0193 |                    | TRAP dicarboxylate transporter- DctP subunit                                                     |                     | -4.50 | 5.27E-04    | 0.004592119 |
| Pden_0194 |                    | conserved hypothetical protein                                                                   |                     | -2.26 | 8.85E-05    | 0.001940531 |
| Pden_0195 |                    | L-carnitine dehydratase/bile acid-inducible protein F                                            |                     | -2.21 | 4.30E-04    | 0.004090524 |
| Pden_0203 |                    | luciferase family protein                                                                        |                     | -2.71 | 1.52E-05    | 8.86E-04    |
| Pden_0206 |                    | short-chain dehydrogenase/reductase SDR                                                          |                     | -2.37 | 2.97E-04    | 0.003369347 |
| Pden_0220 |                    | luciferase family protein                                                                        |                     | -1.66 | 6.20E-04    | 0.005085218 |
| Pden_0224 |                    | sigma54 specific transcriptional regulator, Fis family                                           |                     | -2.61 | 6.41E-05    | 0.001689635 |
| Pden_0233 |                    | membrane protein-like protein                                                                    |                     | 2.00  | 7.33E-05    | 0.001802006 |
| Pden_0235 |                    | oligopeptide/dipeptide ABC transporter, ATPase subunit                                           |                     | -2.40 | 7.86E-05    | 0.001836392 |
| Pden_0236 |                    | oligopeptide/dipeptide ABC transporter, ATPase subunit                                           |                     | -2.64 | 2.64E-05    | 0.001142137 |
| Pden_0237 |                    | binding-protein-dependent transport systems inner membrane component                             |                     | -3.24 | 3.29E-04    | 0.003583012 |
| Pden_0238 |                    | binding-protein-dependent transport systems inner membrane component                             |                     | -3.68 | 1.01E-04    | 0.00205033  |
| Pden_0239 |                    | extracellular solute-binding protein, family 5                                                   |                     | -3.76 | 2.02E-04    | 0.002752118 |
| Pden_0241 |                    | (R)-2-hydroxyacid dehydrogenase                                                                  |                     | -1.73 | 2.18E-04    | 0.002830827 |
| Pden_0242 |                    | iron-containing alcohol dehydrogenase                                                            |                     | -3.03 | 3.51E-05    | 0.001297726 |
| Pden_0243 |                    | succinate semialdehyde dehydrogenase                                                             |                     | -2.06 | 0.001108637 | 0.007205428 |
| Pden_0244 |                    | Mandelate racemase/muconate lactonizing enzyme, C-terminal domain protein                        |                     | -2.14 | 2.03E-04    | 0.002760804 |
| Pden_0245 |                    | 5-carboxymethyl-2-hydroxymuconate delta-isomerase                                                |                     | -1.93 | 3.40E-04    | 0.00362723  |
| Pden_0270 |                    | gene transfer agent (GTA) like protein                                                           |                     | 1.14  | 0.00153829  | 0.008962304 |
| Pden_0280 | <i>ehuA</i>        | hydroxyectoine ABC transporter ATP-binding protein / ectoine ABC transporter ATP-binding protein |                     | -3.32 | 0.001180755 | 0.007510254 |
| Pden_0281 | <i>ehuB</i>        | hydroxyectoine-binding protein / ectoine-binding protein                                         |                     | -3.32 | 1.83E-04    | 0.00264125  |
| Pden_0282 | <i>ehuC</i>        | hydroxyectoine ABC transporter membrane protein / ectoine ABC transporter membrane protein       |                     | -3.60 | 1.15E-04    | 0.002162073 |
| Pden_0283 | <i>ehuD</i>        | hydroxyectoine ABC transporter membrane protein / ectoine ABC transporter membrane protein       |                     | -2.96 | 2.63E-04    | 0.003161243 |
| Pden_0284 |                    | Asp/Glu racemase                                                                                 |                     | -2.41 | 0.001005012 | 0.006795278 |
| Pden_0285 | <i>eutB</i>        | Pyridoxal-5'-phosphate-dependent enzyme, beta subunit                                            |                     | -2.33 | 5.31E-04    | 0.004618534 |
| Pden_0286 |                    | Ornithine cyclodeaminase                                                                         |                     | -2.64 | 9.23E-04    | 0.006496172 |
| Pden_0287 | <i>doeA</i>        | peptidase M24                                                                                    |                     | -2.79 | 6.40E-04    | 0.005146542 |

|           |             |                                                                                                                                         |   |       |             |             |
|-----------|-------------|-----------------------------------------------------------------------------------------------------------------------------------------|---|-------|-------------|-------------|
| Pden_0290 |             | aminotransferase                                                                                                                        |   | -2.29 | 6.83E-04    | 0.005345115 |
| Pden_0296 |             | TonB-dependent receptor                                                                                                                 |   | -1.88 | 2.19E-04    | 0.002830827 |
| Pden_0303 |             | transmembrane pair domain protein                                                                                                       |   | -3.53 | 0.00184495  | 0.009969029 |
| Pden_0304 |             | transcriptional regulator, LysR family                                                                                                  |   | 3.07  | 5.99E-04    | 0.004987227 |
| Pden_0314 |             | AmiS/Urel transporter                                                                                                                   |   | 1.19  | 0.001051461 | 0.006987997 |
| Pden_0319 |             | conserved hypothetical protein                                                                                                          |   | -2.06 | 0.001046144 | 0.006969248 |
| Pden_0337 |             | conserved hypothetical protein                                                                                                          |   | 6.24  | 1.33E-06    | 1.77E-04    |
| Pden_0338 |             | hypothetical protein                                                                                                                    |   | 6.06  | 2.82E-06    | 3.04E-04    |
| Pden_0339 |             | hypothetical protein                                                                                                                    |   | 6.38  | 9.15E-07    | 1.45E-04    |
| Pden_0340 |             | hypothetical protein                                                                                                                    |   | 5.68  | 1.68E-04    | 0.002556934 |
| Pden_0341 |             | DNA methylase N-4/N-6 domain protein                                                                                                    |   | 6.02  | 7.92E-06    | 5.99E-04    |
| Pden_0342 |             | DNA polymerase III beta subunit family protein                                                                                          |   | 5.98  | 2.12E-06    | 2.47E-04    |
| Pden_0343 |             | hypothetical protein                                                                                                                    |   | 5.19  | 8.29E-05    | 0.001890849 |
| Pden_0345 |             | hypothetical protein                                                                                                                    |   | 3.55  | 3.94E-06    | 3.76E-04    |
| Pden_0346 |             | hypothetical protein                                                                                                                    |   | 3.54  | 2.01E-05    | 9.98E-04    |
| Pden_0348 |             | hypothetical protein                                                                                                                    |   | 4.74  | 2.20E-06    | 2.47E-04    |
| Pden_0349 |             | hypothetical protein                                                                                                                    |   | 5.52  | 2.92E-06    | 3.07E-04    |
| Pden_0350 |             | hypothetical protein                                                                                                                    | 1 | 5.50  | 1.25E-06    | 1.72E-04    |
| Pden_0352 |             | hypothetical protein                                                                                                                    | 1 | 5.76  | 5.90E-06    | 4.82E-04    |
| Pden_0353 |             | phage/plasmid primase, P4 family                                                                                                        | 1 | 5.32  | 1.12E-06    | 1.63E-04    |
| Pden_0355 |             | hypothetical protein                                                                                                                    | 1 | 4.57  | 2.20E-06    | 2.47E-04    |
| Pden_0356 |             | HNH endonuclease                                                                                                                        | 1 | 6.28  | 8.74E-05    | 0.001937938 |
| Pden_0357 |             | hypothetical protein                                                                                                                    | 1 | 6.91  | 4.88E-06    | 4.34E-04    |
| Pden_0358 |             | Resolvase helix-turn-helix domain protein                                                                                               | 1 | 7.86  | 2.16E-07    | 7.94E-05    |
| Pden_0359 |             | phage Terminase                                                                                                                         | 1 | 7.70  | 4.78E-07    | 1.10E-04    |
| Pden_0360 |             | phage portal protein, HK97 family                                                                                                       | 1 | 7.53  | 1.72E-07    | 7.94E-05    |
| Pden_0361 |             | peptidase S14, ClpP                                                                                                                     | 1 | 7.40  | 3.20E-07    | 9.06E-05    |
| Pden_0362 |             | phage major capsid protein, HK97 family                                                                                                 | 1 | 7.59  | 2.17E-07    | 7.94E-05    |
| Pden_0363 |             | hypothetical protein                                                                                                                    | 1 | 7.21  | 3.65E-05    | 0.001320801 |
| Pden_0364 |             | hypothetical protein                                                                                                                    | 1 | 7.23  | 9.42E-07    | 1.45E-04    |
| Pden_0365 |             | hypothetical protein                                                                                                                    | 1 | 7.75  | 1.08E-06    | 1.61E-04    |
| Pden_0366 |             | phage head-tail adaptor, putative                                                                                                       | 1 | 7.37  | 1.26E-06    | 1.72E-04    |
| Pden_0367 |             | hypothetical protein                                                                                                                    | 1 | 6.99  | 4.16E-05    | 0.001440403 |
| Pden_0369 |             | hypothetical protein                                                                                                                    | 1 | 6.37  | 1.69E-04    | 0.002556934 |
| Pden_0370 |             | hypothetical protein                                                                                                                    | 1 | 6.44  | 1.62E-05    | 8.87E-04    |
| Pden_0371 |             | hypothetical protein                                                                                                                    | 1 | 6.66  | 8.95E-07    | 1.45E-04    |
| Pden_0372 |             | hypothetical protein                                                                                                                    | 1 | 6.39  | 8.95E-07    | 1.45E-04    |
| Pden_0373 |             | hypothetical protein                                                                                                                    | 1 | 5.49  | 3.28E-05    | 0.001268121 |
| Pden_0374 |             | hypothetical protein                                                                                                                    | 1 | 5.51  | 1.06E-05    | 7.37E-04    |
| Pden_0375 |             | conserved hypothetical protein                                                                                                          | 1 | 6.46  | 1.30E-04    | 0.002284717 |
| Pden_0376 |             | hypothetical protein                                                                                                                    | 1 | 7.15  | 7.81E-07    | 1.45E-04    |
| Pden_0377 |             | hypothetical protein                                                                                                                    | 1 | 7.53  | 5.49E-07    | 1.15E-04    |
| Pden_0378 |             | hypothetical protein                                                                                                                    | 1 | 7.76  | 1.46E-06    | 1.84E-04    |
| Pden_0379 |             | hypothetical protein                                                                                                                    | 1 | 7.27  | 1.41E-06    | 1.83E-04    |
| Pden_0381 |             | hypothetical protein                                                                                                                    | 1 | 7.02  | 4.51E-05    | 0.001444301 |
| Pden_0382 |             | hypothetical protein                                                                                                                    | 1 | 7.28  | 1.08E-05    | 7.37E-04    |
| Pden_0386 |             | protein of unknown function DUF159                                                                                                      |   | 5.03  | 8.29E-05    | 0.001890849 |
| Pden_0387 |             | hypothetical protein                                                                                                                    |   | 2.88  | 4.38E-06    | 3.97E-04    |
| Pden_0388 |             | hypothetical protein                                                                                                                    |   | 3.10  | 1.23E-05    | 7.80E-04    |
| Pden_0392 |             | hypothetical protein                                                                                                                    |   | 2.26  | 3.20E-04    | 0.003546894 |
| Pden_0396 | <i>mtaB</i> | MiaB-like tRNA modifying enzyme                                                                                                         |   | 1.19  | 0.001499277 | 0.008820336 |
| Pden_0400 | <i>dxs</i>  | 1-deoxy-D-xylulose-5-phosphate synthase                                                                                                 |   | 1.35  | 0.001403645 | 0.008430197 |
| Pden_0407 |             | glutathione S-transferase                                                                                                               |   | 1.84  | 0.001612539 | 0.009144328 |
| Pden_0415 |             | outer membrane protein                                                                                                                  |   | 1.10  | 0.001708494 | 0.009526546 |
| Pden_0462 |             | IstB domain protein ATP-binding protein                                                                                                 |   | -1.16 | 0.001340148 | 0.008184762 |
| Pden_0464 |             | transposase IS116/IS110/IS902 family protein                                                                                            |   | -1.55 | 5.88E-04    | 0.004960806 |
| Pden_0472 |             | 5-oxoprolinase (ATP-hydrolyzing)                                                                                                        |   | -2.50 | 4.32E-05    | 0.001441542 |
| Pden_0473 |             | Hydantoinase B/oxoprolinase                                                                                                             |   | -2.31 | 6.50E-05    | 0.001696353 |
| Pden_0474 |             | short-chain dehydrogenase/reductase SDR                                                                                                 |   | -2.22 | 4.41E-05    | 0.001441542 |
| Pden_0475 |             | hypothetical protein                                                                                                                    |   | -2.08 | 2.17E-04    | 0.002830827 |
| Pden_0476 |             | thioesterase superfamily protein                                                                                                        |   | -1.66 | 0.001665666 | 0.009359866 |
| Pden_0495 |             | response regulator receiver protein                                                                                                     |   | 1.49  | 9.67E-04    | 0.006681372 |
| Pden_0498 |             | hypothetical protein                                                                                                                    |   | 2.14  | 7.13E-04    | 0.005462944 |
| Pden_0503 |             | ribose ABC transporter ATP-binding protein / fructose ABC transporter ATP-binding protein / mannose ABC transporter ATP-binding protein |   | -3.73 | 2.87E-05    | 0.001183343 |
| Pden_0504 |             | fructose ABC transporter membrane protein / mannose ABC transporter membrane protein / ribose ABC transporter membrane protein          |   | -4.43 | 1.34E-04    | 0.002284871 |
| Pden_0505 |             | mannose-binding protein / fructose-binding protein / ribose-binding protein                                                             |   | -4.16 | 2.30E-05    | 0.001068039 |
| Pden_0528 |             | nucleoside-binding protein                                                                                                              |   | -2.18 | 1.57E-04    | 0.002451077 |
| Pden_0538 | <i>glyQ</i> | glycyl-tRNA synthetase alpha chain                                                                                                      |   | 1.75  | 3.46E-04    | 0.003644311 |
| Pden_0539 |             | signal transduction histidine kinase regulating citrate/malate metabolism                                                               |   | 1.60  | 6.66E-04    | 0.005274631 |
| Pden_0540 | <i>glyS</i> | glycyl-tRNA synthetase beta chain                                                                                                       |   | 1.99  | 1.03E-04    | 0.002056763 |
| Pden_0546 |             | monooxygenase, FAD-binding protein                                                                                                      |   | 1.66  | 5.94E-04    | 0.004969545 |
| Pden_0575 | <i>gatC</i> | aspartyl/glutamyl-tRNA(Asn/Gln) amidotransferase subunit C                                                                              |   | 1.07  | 0.001726452 | 0.009573963 |
| Pden_0576 | <i>gatA</i> | aspartyl/glutamyl-tRNA(Asn/Gln) amidotransferase subunit A                                                                              |   | 1.28  | 0.001748308 | 0.009652871 |
| Pden_0579 | <i>rimJ</i> | protein of unknown function DUF519                                                                                                      |   | 1.44  | 4.96E-04    | 0.0044545   |
| Pden_0587 | <i>murF</i> | UDP-N-acetylmuramoyl-tripeptide--D-alanyl-D-alanine ligase                                                                              |   | 1.44  | 9.57E-04    | 0.006665586 |
| Pden_0588 | <i>mraY</i> | Phospho-N-acetylmuramoyl-pentapeptide-transferase                                                                                       |   | 1.34  | 5.37E-04    | 0.00465373  |
| Pden_0589 | <i>murD</i> | UDP-N-acetylmuramoylalanine--D-glutamate ligase                                                                                         |   | 1.67  | 0.00183284  | 0.009924778 |
| Pden_0590 |             | membrane protein involved in aromatic hydrocarbon degradation                                                                           |   | -3.97 | 9.85E-04    | 0.006721522 |
| Pden_0592 | <i>guaB</i> | inosine-5'-monophosphate dehydrogenase                                                                                                  |   | 1.24  | 0.00108132  | 0.00710081  |
| Pden_0593 |             | hypothetical protein                                                                                                                    |   | 2.33  | 3.22E-05    | 0.001255634 |

|           |             |                                                                                                                                                                                            |       |             |             |             |
|-----------|-------------|--------------------------------------------------------------------------------------------------------------------------------------------------------------------------------------------|-------|-------------|-------------|-------------|
| Pden_0601 |             | hypothetical protein                                                                                                                                                                       | 4.56  | 4.92E-05    | 0.001490678 |             |
| Pden_0602 |             | hypothetical protein                                                                                                                                                                       | 4.18  | 6.31E-04    | 0.005126214 |             |
| Pden_0603 | <i>purA</i> | Adenylosuccinate synthetase                                                                                                                                                                | 1.77  | 2.09E-04    | 0.00277756  |             |
| Pden_0604 |             | conserved hypothetical protein                                                                                                                                                             | 1.80  | 3.50E-04    | 0.003644311 |             |
| Pden_0605 |             | thiamine diphosphokinase                                                                                                                                                                   | 1.92  | 9.76E-05    | 0.00201788  |             |
| Pden_0608 |             | extracellular solute-binding protein, family 5                                                                                                                                             | -2.02 | 4.80E-04    | 0.004348292 |             |
| Pden_0610 |             | amidohydrolase                                                                                                                                                                             | -1.42 | 8.42E-04    | 0.00608831  |             |
| Pden_0628 |             | hypothetical protein                                                                                                                                                                       | 1.10  | 0.001158962 | 0.007427627 |             |
| Pden_0632 | <i>smpB</i> | SsrA-binding protein                                                                                                                                                                       | 1.59  | 1.62E-04    | 0.002501662 |             |
| Pden_0645 | <i>def</i>  | peptide deformylase                                                                                                                                                                        | 1.39  | 0.001141422 | 0.007371199 |             |
| Pden_0646 | <i>def</i>  | Peptide deformylase                                                                                                                                                                        | 1.30  | 6.54E-04    | 0.005207841 |             |
| Pden_0654 |             | hypothetical protein                                                                                                                                                                       | 1.49  | 4.09E-04    | 0.003981134 |             |
| Pden_0659 | <i>topA</i> | DNA topoisomerase I                                                                                                                                                                        | 1.69  | 9.38E-05    | 0.001988942 |             |
| Pden_0660 | <i>ggt</i>  | gamma-glutamyltransferase 1, Threonine peptidase, MEROPS family T03                                                                                                                        | -2.47 | 5.77E-05    | 0.001613164 |             |
| Pden_0661 |             | protein of unknown function DUF488                                                                                                                                                         | 2.20  | 3.66E-04    | 0.003728529 |             |
| Pden_0665 |             | phosphate transporter                                                                                                                                                                      | 1.85  | 3.93E-04    | 0.003899314 |             |
| Pden_0677 |             | putative hydantoin racemase protein                                                                                                                                                        | -1.95 | 0.001103207 | 0.007188594 |             |
| Pden_0691 |             | chorismate mutase                                                                                                                                                                          | 1.50  | 3.01E-04    | 0.003398128 |             |
| Pden_0706 |             | protein of unknown function DUF6, transmembrane                                                                                                                                            | 1.58  | 3.89E-04    | 0.003876944 |             |
| Pden_0707 |             | inositol monophosphatase                                                                                                                                                                   | 1.70  | 1.59E-04    | 0.002464835 |             |
| Pden_0738 |             | transferase hexapeptide repeat containing protein                                                                                                                                          | 2.49  | 1.40E-04    | 0.002302411 |             |
| Pden_0739 |             | ABC transporter related protein                                                                                                                                                            | 2.19  | 2.30E-04    | 0.002922473 |             |
| Pden_0740 |             | hypothetical protein                                                                                                                                                                       | 2.68  | 8.99E-05    | 0.001961867 |             |
| Pden_0742 | <i>nusG</i> | transcription antitermination protein nusG                                                                                                                                                 | 2.17  | 3.48E-05    | 0.001297726 |             |
| Pden_0744 | <i>rplA</i> | LSU ribosomal protein L1P                                                                                                                                                                  | 2.05  | 2.04E-04    | 0.002760804 |             |
| Pden_0745 | <i>rplJ</i> | LSU ribosomal protein L10P                                                                                                                                                                 | 3.56  | 7.20E-05    | 0.001785877 |             |
| Pden_0746 | <i>rplL</i> | LSU ribosomal protein L12P / LSU ribosomal protein L12P                                                                                                                                    | 3.18  | 9.15E-05    | 0.001979539 |             |
| Pden_0749 | <i>rpoC</i> | DNA-directed RNA polymerase subunit beta'                                                                                                                                                  | 1.50  | 0.001118009 | 0.007229223 |             |
| Pden_0759 | <i>rplC</i> | LSU ribosomal protein L3P                                                                                                                                                                  | 2.47  | 4.39E-04    | 0.004136616 |             |
| Pden_0760 | <i>rplD</i> | LSU ribosomal protein L4P                                                                                                                                                                  | 3.11  | 5.75E-05    | 0.001613164 |             |
| Pden_0765 | <i>rpsC</i> | SSU ribosomal protein S3P                                                                                                                                                                  | 2.49  | 1.92E-04    | 0.002717725 |             |
| Pden_0766 | <i>rplP</i> | LSU ribosomal protein L16P                                                                                                                                                                 | 2.31  | 0.001176391 | 0.007497765 |             |
| Pden_0776 | <i>rpsE</i> | SSU ribosomal protein S5P                                                                                                                                                                  | 2.06  | 0.001690065 | 0.009465483 |             |
| Pden_0778 |             | conserved hypothetical protein                                                                                                                                                             | 2.69  | 1.17E-04    | 0.002162707 |             |
| Pden_0779 | <i>rplO</i> | LSU ribosomal protein L15P                                                                                                                                                                 | 2.84  | 7.28E-05    | 0.001797426 |             |
| Pden_0784 | <i>rpoA</i> | DNA-directed RNA polymerase subunit alpha                                                                                                                                                  | 2.55  | 0.001003841 | 0.006795278 |             |
| Pden_0791 |             | HAD-superfamily hydrolase, subfamily IA, variant 3                                                                                                                                         | 1.30  | 0.001075262 | 0.007079394 |             |
| Pden_0794 |             | L-asparagine ABC transporter membrane protein / L-glutamine ABC transporter membrane protein / L-glutamate ABC transporter membrane protein / L-aspartate ABC transporter membrane protein | -1.80 | 0.00116584  | 0.007452837 |             |
| Pden_0810 |             | extracellular solute-binding protein, family 5                                                                                                                                             | -1.81 | 8.91E-04    | 0.006310843 |             |
| Pden_0812 | <i>serB</i> | phosphoserine phosphatase                                                                                                                                                                  | 1.58  | 5.94E-04    | 0.004969545 |             |
| Pden_0813 |             | phosphoserine aminotransferase apoenzyme                                                                                                                                                   | 1.49  | 4.71E-04    | 0.004312253 |             |
| Pden_0823 |             | protein of unknown function DUF404                                                                                                                                                         | -1.74 | 1.06E-04    | 0.002072833 |             |
| Pden_0824 |             | protein of unknown function DUF403                                                                                                                                                         | -1.37 | 3.98E-04    | 0.003908229 |             |
| Pden_0827 | <i>mutS</i> | DNA mismatch repair protein MutS                                                                                                                                                           | 1.70  | 0.001510105 | 0.008849146 |             |
| Pden_0829 |             | extracellular solute-binding protein, family 1                                                                                                                                             | -1.85 | 2.33E-04    | 0.002932574 |             |
| Pden_0850 | <i>trhO</i> | Rhodanese domain protein                                                                                                                                                                   | 1.63  | 1.60E-04    | 0.002483517 |             |
| Pden_0856 |             | Lysine exporter protein (LYSE/YGGA)                                                                                                                                                        | 1.05  | 0.0013187   | 0.008092821 |             |
| Pden_0863 | <i>ptsP</i> | PTSINtr with GAF domain, PtsP                                                                                                                                                              | 1.45  | 0.001739641 | 0.009626016 |             |
| Pden_0864 |             | ABC transporter related protein                                                                                                                                                            | 2.98  | 6.97E-05    | 0.001761223 |             |
| Pden_0865 |             | transport system permease protein                                                                                                                                                          | 2.45  | 0.001376701 | 0.008325092 |             |
| Pden_0866 |             | periplasmic binding protein                                                                                                                                                                | 1.46  | 4.60E-04    | 0.004272675 |             |
| Pden_0867 | <i>tsaA</i> | protein of unknown function UPF0066                                                                                                                                                        | 1.40  | 3.33E-04    | 0.003583012 |             |
| Pden_0868 |             | hypothetical protein                                                                                                                                                                       | 1.13  | 0.001117699 | 0.007229223 |             |
| Pden_0872 | <i>rpmH</i> | LSU ribosomal protein L34P                                                                                                                                                                 | 1.72  | 1.95E-04    | 0.002717725 |             |
| Pden_0873 | <i>rnpA</i> | ribonuclease P protein component                                                                                                                                                           | 1.92  | 8.56E-05    | 0.001917348 |             |
| Pden_0874 | <i>yidD</i> | protein of unknown function DUF37                                                                                                                                                          | 1.66  | 4.31E-04    | 0.004090524 |             |
| Pden_0876 |             | diguanylate phosphodiesterase                                                                                                                                                              | 2.37  | 1.45E-04    | 0.00231305  |             |
| Pden_0877 | <i>yidC</i> | protein translocase subunit yidC                                                                                                                                                           | 1.61  | 2.64E-04    | 0.003162675 |             |
| Pden_0878 |             | MOSC domain containing protein                                                                                                                                                             | 2.48  | 4.23E-05    | 0.001441542 |             |
| Pden_0879 | <i>engB</i> | small GTP-binding protein                                                                                                                                                                  | 2.61  | 7.38E-05    | 0.001805298 |             |
| Pden_0887 | <i>tig</i>  | trigger factor                                                                                                                                                                             | 1.85  | 6.67E-04    | 0.005277599 |             |
| Pden_0888 |             | hypothetical protein                                                                                                                                                                       | 1.51  | 0.001210903 | 0.007644393 |             |
| Pden_0889 | <i>rplI</i> | LSU ribosomal protein L9P                                                                                                                                                                  | 4.32  | 1.28E-04    | 0.002273372 |             |
| Pden_0894 | <i>prfA</i> | bacterial peptide chain release factor 1 (bRF-1)                                                                                                                                           | 1.38  | 0.001090788 | 0.00713522  |             |
| Pden_0895 | <i>prmC</i> | [protein release factor]-glutamine N5-methyltransferase                                                                                                                                    | 2.39  | 3.41E-04    | 0.00363388  |             |
| Pden_0896 |             | conserved hypothetical protein                                                                                                                                                             | 2.05  | 5.90E-05    | 0.001623803 |             |
| Pden_0916 |             | transcriptional regulator, TraR/DksA family                                                                                                                                                | 2.22  | 9.82E-04    | 0.006721522 |             |
| Pden_0924 |             | OsmC family protein                                                                                                                                                                        | 1.50  | 1.92E-04    | 0.002717725 |             |
| Pden_0936 |             | transcriptional regulator, MarR family                                                                                                                                                     | 1.18  | 0.001844245 | 0.009969029 |             |
| Pden_0939 | <i>aspA</i> | aspartate ammonia-lyase                                                                                                                                                                    | -1.53 | 0.001147932 | 0.007373321 |             |
| Pden_0958 | <i>phaC</i> | poly(R)-hydroxyalkanoic acid synthase, class I                                                                                                                                             | -1.50 | 4.30E-04    | 0.004090524 |             |
| Pden_0961 |             | phage integrase family protein                                                                                                                                                             | 2     | 2.04        | 1.84E-04    | 0.002652467 |
| Pden_0962 |             | conserved hypothetical protein                                                                                                                                                             | 2     | 4.21        | 1.95E-05    | 9.86E-04    |
| Pden_0963 |             | conserved hypothetical protein                                                                                                                                                             | 2     | 5.99        | 3.28E-07    | 9.06E-05    |
| Pden_0964 |             | hypothetical protein                                                                                                                                                                       | 2     | 5.63        | 1.61E-05    | 8.87E-04    |
| Pden_0965 |             | hypothetical protein                                                                                                                                                                       | 2     | 6.03        | 2.67E-05    | 0.001146189 |
| Pden_0966 |             | hypothetical protein                                                                                                                                                                       | 2     | 6.04        | 9.43E-07    | 1.43E-04    |
| Pden_0967 |             | hypothetical protein                                                                                                                                                                       | 2     | 6.12        | 1.84E-07    | 7.94E-05    |
| Pden_0968 |             | bacteriophage hypothetical protein                                                                                                                                                         | 2     | 5.84        | 3.44E-04    | 0.003644311 |

|           |             |                                                                      |   |       |             |             |
|-----------|-------------|----------------------------------------------------------------------|---|-------|-------------|-------------|
| Pden_0969 |             | DNA methylase N-4/N-6 domain protein                                 | 2 | 6.85  | 1.62E-06    | 2.00E-04    |
| Pden_0970 |             | DNA polymerase III beta subunit family protein                       | 2 | 6.34  | 7.65E-07    | 1.45E-04    |
| Pden_0971 |             | hypothetical protein                                                 | 2 | 6.15  | 2.20E-07    | 7.94E-05    |
| Pden_0972 |             | hypothetical protein                                                 | 2 | 6.18  | 7.63E-08    | 7.94E-05    |
| Pden_0973 |             | hypothetical protein                                                 | 2 | -2.60 | 0.001073263 | 0.007075428 |
| Pden_0974 |             | hypothetical protein                                                 | 2 | 5.34  | 1.95E-04    | 0.002717725 |
| Pden_0977 |             | hypothetical protein                                                 | 2 | 5.16  | 4.34E-07    | 1.10E-04    |
| Pden_0979 |             | hypothetical protein                                                 | 2 | 6.72  | 2.60E-07    | 8.78E-05    |
| Pden_0980 |             | hypothetical protein                                                 | 2 | 6.56  | 5.70E-07    | 1.15E-04    |
| Pden_0981 |             | hypothetical protein                                                 | 2 | 6.31  | 5.16E-06    | 4.50E-04    |
| Pden_0982 |             | hypothetical protein                                                 | 2 | 7.66  | 3.40E-07    | 9.06E-05    |
| Pden_0983 |             | phage/plasmid primase, P4 family                                     | 2 | 7.10  | 9.49E-08    | 7.94E-05    |
| Pden_0984 |             | hypothetical protein                                                 | 2 | 6.57  | 3.66E-06    | 3.56E-04    |
| Pden_0985 |             | HNH endonuclease                                                     | 2 | 6.28  | 8.75E-05    | 0.001937938 |
| Pden_0986 |             | hypothetical protein                                                 | 2 | 6.95  | 1.11E-05    | 7.46E-04    |
| Pden_0987 |             | Resolvase helix-turn-helix domain protein                            | 2 | 7.91  | 3.11E-07    | 9.06E-05    |
| Pden_0988 |             | phage Terminase                                                      | 2 | 7.91  | 1.99E-07    | 7.94E-05    |
| Pden_0989 |             | phage portal protein, HK97 family                                    | 2 | 7.84  | 1.86E-07    | 7.94E-05    |
| Pden_0990 |             | peptidase S14, ClpP                                                  | 2 | 7.45  | 1.82E-07    | 7.94E-05    |
| Pden_0991 |             | phage major capsid protein, HK97 family                              | 2 | 7.60  | 2.09E-07    | 7.94E-05    |
| Pden_0992 |             | hypothetical protein                                                 | 2 | 7.21  | 3.65E-05    | 0.001320801 |
| Pden_0993 |             | hypothetical protein                                                 | 2 | 7.23  | 9.45E-07    | 1.45E-04    |
| Pden_0994 |             | hypothetical protein                                                 | 2 | 7.63  | 2.10E-07    | 7.94E-05    |
| Pden_0995 |             | hypothetical protein                                                 | 2 | 7.13  | 3.03E-05    | 0.001216131 |
| Pden_0996 |             | gene transfer agent                                                  | 2 | 7.28  | 8.30E-06    | 6.18E-04    |
| Pden_0997 |             | phage protein, HK97 gp10 family                                      | 2 | 7.79  | 1.48E-05    | 8.86E-04    |
| Pden_0998 |             | hypothetical protein                                                 | 2 | 7.62  | 5.36E-07    | 1.15E-04    |
| Pden_0999 |             | hypothetical protein                                                 | 2 | 7.50  | 1.50E-07    | 7.94E-05    |
| Pden_1000 |             | phage tape measure protein                                           | 2 | 6.57  | 1.80E-06    | 2.17E-04    |
| Pden_1001 |             | hypothetical protein                                                 |   | 5.83  | 1.96E-04    | 0.002717725 |
| Pden_1002 |             | hypothetical protein                                                 |   | 5.80  | 3.78E-05    | 0.001337417 |
| Pden_1003 |             | conserved hypothetical protein                                       |   | 6.64  | 4.56E-07    | 1.10E-04    |
| Pden_1004 |             | hypothetical protein                                                 |   | 7.43  | 2.06E-07    | 7.94E-05    |
| Pden_1009 |             | conserved hypothetical protein 698                                   |   | 1.91  | 0.001697942 | 0.009488612 |
| Pden_1038 |             | protein of unknown function DUF6, transmembrane                      |   | 2.21  | 4.62E-05    | 0.00146383  |
| Pden_1041 | <i>nadX</i> | aspartate dehydrogenase                                              |   | 2.11  | 1.89E-04    | 0.002696005 |
| Pden_1042 |             | alpha/beta hydrolase fold protein                                    |   | 1.79  | 3.20E-04    | 0.003546894 |
| Pden_1051 |             | Aldehyde dehydrogenase (NAD(+))                                      |   | 1.95  | 4.61E-04    | 0.004272675 |
| Pden_1056 |             | hypothetical protein                                                 |   | 1.58  | 5.12E-04    | 0.004509969 |
| Pden_1057 |             | N-isopropylammelide isopropylaminohydrolase                          |   | -2.59 | 4.13E-04    | 0.004008472 |
| Pden_1058 |             | transcriptional regulator, LysR family                               |   | 1.44  | 8.03E-04    | 0.005892484 |
| Pden_1077 |             | carbohydrate ABC transporter ATP-binding protein, CUT1 family        |   | 3.10  | 5.58E-05    | 0.001611959 |
| Pden_1079 |             | binding-protein-dependent transport systems inner membrane component |   | 3.19  | 1.37E-04    | 0.002292537 |
| Pden_1080 |             | beta-lactamase domain protein                                        |   | 2.82  | 1.94E-04    | 0.002717725 |
| Pden_1109 |             | rhodanese-like protein                                               |   | -1.63 | 1.22E-04    | 0.002225558 |
| Pden_1111 |             | NCS1 nucleoside transporter family                                   |   | -3.56 | 0.001700764 | 0.009493899 |
| Pden_1112 | <i>hydA</i> | dihydropyrimidinase                                                  |   | -3.99 | 0.001562951 | 0.009040019 |
| Pden_1119 | <i>npdG</i> | reduced coenzyme F420:NADP oxidoreductase                            |   | -4.00 | 2.69E-04    | 0.003197585 |
| Pden_1120 |             | methylenetetrahydromethanopterin reductase                           |   | -3.98 | 0.001406503 | 0.008437355 |
| Pden_1132 |             | PRC-barrel containing protein                                        |   | 2.99  | 1.30E-04    | 0.002284717 |
| Pden_1134 |             | short-chain dehydrogenase/reductase SDR                              |   | 1.09  | 0.001660125 | 0.009345864 |
| Pden_1136 |             | protein of unknown function DUF892                                   |   | 3.70  | 3.28E-06    | 3.32E-04    |
| Pden_1142 |             | ABC transporter related protein                                      |   | 1.89  | 0.001360127 | 0.008247094 |
| Pden_1144 |             | conserved hypothetical protein                                       |   | -2.23 | 0.001776894 | 0.009725855 |
| Pden_1145 |             | intracellular protease, PfpI family                                  |   | -2.28 | 4.18E-04    | 0.004027362 |
| Pden_1147 |             | amino acid ABC transporter substrate-binding protein, PAAT family    |   | -4.17 | 2.32E-04    | 0.002927786 |
| Pden_1148 |             | amino acid ABC transporter membrane protein 1, PAAT family           |   | -3.54 | 5.65E-05    | 0.001613164 |
| Pden_1149 |             | amino acid ABC transporter membrane protein 2, PAAT family           |   | -3.19 | 5.76E-04    | 0.004898771 |
| Pden_1150 |             | amino acid ABC transporter ATP-binding protein, PAAT family          |   | -2.72 | 1.33E-04    | 0.002284717 |
| Pden_1151 |             | agmatinase                                                           |   | -1.64 | 4.19E-04    | 0.0040289   |
| Pden_1163 |             | NUDIX hydrolase                                                      |   | 2.46  | 6.75E-04    | 0.005311929 |
| Pden_1167 |             | molybdenum ABC transporter, periplasmic molybdate-binding protein    |   | 2.46  | 2.42E-05    | 0.001105881 |
| Pden_1172 |             | TOBE domain protein                                                  |   | -1.63 | 2.16E-04    | 0.002830827 |
| Pden_1175 | <i>catC</i> | muconolactone delta-isomerase                                        |   | -3.07 | 3.95E-04    | 0.003907767 |
| Pden_1176 | <i>catA</i> | catechol 1,2-dioxygenase                                             |   | -4.31 | 0.00127546  | 0.007904108 |
| Pden_1186 | <i>fdhA</i> | glutathione-independent formaldehyde dehydrogenase                   |   | -2.85 | 1.03E-04    | 0.002055734 |
| Pden_1199 |             | amidohydrolase                                                       |   | -3.95 | 2.85E-05    | 0.001181612 |
| Pden_1200 |             | conserved hypothetical protein                                       |   | -3.40 | 2.72E-05    | 0.001152121 |
| Pden_1201 |             | conserved hypothetical protein                                       |   | -2.70 | 1.17E-04    | 0.002162707 |
| Pden_1221 |             | transposase, IS4 family                                              |   | 2.00  | 1.78E-04    | 0.002605071 |
| Pden_1222 |             | transposase-like protein                                             |   | 2.08  | 2.59E-04    | 0.00312771  |
| Pden_1225 |             | hypothetical protein                                                 |   | -1.42 | 0.001475236 | 0.008715426 |
| Pden_1232 |             | H10933 family protein                                                |   | 1.52  | 4.79E-04    | 0.004348292 |
| Pden_1255 |             | short-chain dehydrogenase/reductase SDR                              |   | -2.67 | 2.65E-04    | 0.003174839 |
| Pden_1275 | <i>tkt</i>  | transketolase                                                        |   | 1.59  | 2.51E-04    | 0.003045163 |
| Pden_1277 |             | uracil-xanthine permease                                             |   | -2.41 | 1.46E-04    | 0.00231305  |
| Pden_1298 | <i>gmd</i>  | GDP-mannose 4,6-dehydratase                                          |   | 2.10  | 3.18E-05    | 0.001249299 |
| Pden_1305 |             | Antibiotic biosynthesis monooxygenase                                |   | -2.38 | 1.45E-04    | 0.00231305  |
| Pden_1306 |             | Cobyrinic acid a,c-diamide synthase                                  |   | -1.25 | 7.05E-04    | 0.005423503 |
| Pden_1314 |             | periplasmic glucan biosynthesis protein, MdoG                        |   | 1.14  | 0.001784956 | 0.009748901 |
| Pden_1315 | <i>mdoH</i> | glycosyl transferase, family 2                                       |   | 1.51  | 3.51E-04    | 0.003644311 |

|           |             |                                                                         |       |             |             |
|-----------|-------------|-------------------------------------------------------------------------|-------|-------------|-------------|
| Pden_1316 |             | conserved hypothetical protein                                          | 2.15  | 2.91E-04    | 0.003349127 |
| Pden_1323 |             | pyridoxamine 5'-phosphate oxidase-related, FMN-binding protein          | -1.14 | 9.91E-04    | 0.006753469 |
| Pden_1327 | <i>oppB</i> | binding-protein-dependent transport systems inner membrane component    | -1.41 | 7.72E-04    | 0.005770981 |
| Pden_1338 |             | cobalamin synthesis protein, P47K                                       | 1.35  | 0.001037432 | 0.006920316 |
| Pden_1341 |             | extracellular solute-binding protein, family 5                          | 2.11  | 1.65E-04    | 0.002535748 |
| Pden_1342 |             | binding-protein-dependent transport systems inner membrane component    | 2.66  | 4.13E-04    | 0.004008472 |
| Pden_1346 | <i>prpB</i> | 2,3-dimethylmalate lyase                                                | 2.03  | 0.001723333 | 0.009573963 |
| Pden_1348 |             | 2-methylcitrate dehydratase                                             | 2.62  | 1.37E-04    | 0.002292537 |
| Pden_1349 |             | thioesterase superfamily protein                                        | 3.47  | 6.82E-05    | 0.001743521 |
| Pden_1351 |             | LysR, substrate-binding protein                                         | 3.18  | 0.001560994 | 0.009040019 |
| Pden_1374 |             | metallophosphoesterase                                                  | 1.76  | 2.15E-04    | 0.002823334 |
| Pden_1377 |             | Redoxin domain protein                                                  | 3.44  | 1.24E-04    | 0.002256524 |
| Pden_1420 | <i>dusA</i> | tRNA-U16,U17-dihydrouridine synthase                                    | 1.76  | 3.52E-04    | 0.003644311 |
| Pden_1431 |             | transcriptional regulator, GntR family                                  | -1.43 | 0.001356109 | 0.008232592 |
| Pden_1432 |             | BioY protein                                                            | -1.63 | 0.001205562 | 0.007629702 |
| Pden_1433 | <i>bioB</i> | biotin synthase                                                         | -2.53 | 2.02E-05    | 9.98E-04    |
| Pden_1466 |             | helix-turn-helix- domain containing protein, AraC type                  | -1.42 | 7.49E-04    | 0.005671257 |
| Pden_1492 |             | ABC transporter related protein                                         | -1.40 | 4.61E-04    | 0.004272675 |
| Pden_1497 |             | transcriptional regulator, AraC family                                  | -3.90 | 9.33E-05    | 0.001988942 |
| Pden_1510 |             | conjugal transfer protein precursor                                     | 2.27  | 0.001517436 | 0.008881825 |
| Pden_1530 |             | hypothetical protein                                                    | -1.61 | 0.001441672 | 0.008597392 |
| Pden_1544 |             | domain of unknown function DUF1738                                      | 2.95  | 4.86E-04    | 0.004381203 |
| Pden_1545 |             | histone family protein nucleoid-structuring protein H-NS                | -1.23 | 0.001540036 | 0.008962304 |
| Pden_1551 |             | protein of unknown function DUF481                                      | -1.94 | 0.001567675 | 0.009040019 |
| Pden_1563 |             | TRAP dicarboxylate transporter- DctP subunit                            | -3.46 | 7.78E-05    | 0.001836392 |
| Pden_1570 | <i>oppB</i> | binding-protein-dependent transport systems inner membrane component    | -1.41 | 7.71E-04    | 0.005770981 |
| Pden_1574 |             | pyridoxamine 5'-phosphate oxidase-related, FMN-binding protein          | -1.14 | 9.81E-04    | 0.006721522 |
| Pden_1581 |             | conserved hypothetical protein                                          | 2.15  | 2.90E-04    | 0.003349127 |
| Pden_1582 | <i>mdoH</i> | glycosyl transferase, family 2                                          | 1.52  | 3.31E-04    | 0.003583012 |
| Pden_1583 |             | periplasmic glucan biosynthesis protein, MdoG                           | 1.14  | 0.001784207 | 0.009748901 |
| Pden_1590 |             | plasmid segregation oscillating ATPase ParF                             | -1.25 | 7.04E-04    | 0.005422813 |
| Pden_1591 |             | Antibiotic biosynthesis monooxygenase                                   | -2.38 | 1.45E-04    | 0.00231305  |
| Pden_1595 |             | ABC transporter related protein                                         | 1.91  | 7.56E-04    | 0.005693964 |
| Pden_1605 |             | flavoprotein                                                            | -1.40 | 0.001775922 | 0.009725855 |
| Pden_1641 |             | conserved hypothetical protein 698                                      | 1.92  | 0.0017226   | 0.009573963 |
| Pden_1647 |             | TRAP dicarboxylate transporter, DctP subunit                            | -1.52 | 6.23E-04    | 0.005101564 |
| Pden_1662 |             | Hemolysin-type calcium-binding region                                   | -2.07 | 7.09E-04    | 0.005447488 |
| Pden_1670 |             | binding-protein-dependent transport systems inner membrane component    | -1.84 | 2.92E-04    | 0.003349127 |
| Pden_1671 |             | extracellular solute-binding protein, family 5                          | -4.11 | 0.00105622  | 0.006990384 |
| Pden_1672 | <i>iolB</i> | 5-deoxyglucuronate isomerase                                            | -1.36 | 8.55E-04    | 0.006160708 |
| Pden_1674 | <i>iolE</i> | 2-keto-myo-inositol dehydratase                                         | -1.81 | 0.001572919 | 0.009049647 |
| Pden_1678 | <i>iolG</i> | myo-inositol 2-dehydrogenase                                            | -1.95 | 7.23E-04    | 0.005522182 |
| Pden_1680 |             | oxidoreductase domain protein                                           | -2.31 | 2.74E-04    | 0.003242033 |
| Pden_1681 |             | monosaccharide ABC transporter substrate-binding protein, CUT2 family   | -3.22 | 6.32E-04    | 0.005126214 |
| Pden_1682 |             | monosaccharide ABC transporter membrane protein, CUT2 family            | -3.05 | 6.58E-05    | 0.001699507 |
| Pden_1683 | <i>rhsA</i> | monosaccharide ABC transporter ATP-binding protein, CUT2 family         | -3.94 | 1.27E-04    | 0.0022686   |
| Pden_1684 |             | monosaccharide ABC transporter substrate-binding protein, CUT2 family   | -4.00 | 3.18E-05    | 0.001249299 |
| Pden_1692 |             | creatinase                                                              | -1.77 | 0.001395237 | 0.008389647 |
| Pden_1693 |             | major facilitator superfamily MFS_1                                     | -3.05 | 3.27E-04    | 0.003573445 |
| Pden_1695 | <i>fbp</i>  | D-fructose 1,6-bisphosphatase                                           | -2.98 | 9.20E-04    | 0.006484226 |
| Pden_1697 | <i>tkl</i>  | transketolase                                                           | -2.62 | 1.69E-04    | 0.002556934 |
| Pden_1698 |             | fructose-bisphosphate aldolase                                          | -3.16 | 8.44E-04    | 0.006098745 |
| Pden_1699 | <i>cbbL</i> | ribulose-1,5-bisphosphate carboxylase/oxygenase large subunit           | -2.80 | 7.41E-04    | 0.005632016 |
| Pden_1701 | <i>cbbX</i> | AAA ATPase, central domain protein                                      | -1.49 | 0.001117141 | 0.007229223 |
| Pden_1703 | <i>peaA</i> | quinoximinoamine dehydrogenase, 60 kDa subunit                          | -4.01 | 0.001817538 | 0.009884204 |
| Pden_1704 | <i>peaB</i> | Radical SAM domain protein                                              | -4.52 | 0.001107394 | 0.007205428 |
| Pden_1705 | <i>qhpC</i> | conserved hypothetical protein                                          | -4.82 | 0.001225191 | 0.007696203 |
| Pden_1706 | <i>peaD</i> | quinoximinoamine dehydrogenase, subunit beta                            | -4.67 | 0.001352545 | 0.008232592 |
| Pden_1707 |             | conserved hypothetical protein                                          | -4.45 | 0.001452228 | 0.008637796 |
| Pden_1709 |             | transcriptional regulator, AraC family                                  | -2.20 | 0.001198387 | 0.007593785 |
| Pden_1710 |             | Betaine-aldehyde dehydrogenase                                          | -6.78 | 0.001726189 | 0.009573963 |
| Pden_1712 |             | glucose-methanol-choline oxidoreductase                                 | -2.49 | 8.82E-05    | 0.001940458 |
| Pden_1713 |             | amino acid/amide ABC transporter membrane protein 2, HAAT family        | -3.13 | 2.06E-05    | 9.98E-04    |
| Pden_1714 |             | amino acid/amide ABC transporter membrane protein 1, HAAT family        | -3.40 | 4.48E-05    | 0.001444301 |
| Pden_1715 |             | amino acid/amide ABC transporter ATP-binding protein 2, HAAT family     | -3.30 | 5.60E-05    | 0.001611959 |
| Pden_1716 |             | amino acid/amide ABC transporter ATP-binding protein 1, HAAT family     | -3.90 | 1.07E-05    | 7.37E-04    |
| Pden_1717 |             | amino acid/amide ABC transporter substrate-binding protein, HAAT family | -4.29 | 6.97E-06    | 5.52E-04    |
| Pden_1719 |             | AMP-dependent synthetase and ligase                                     | -1.90 | 4.64E-05    | 0.00146383  |
| Pden_1721 |             | transporter, UIT1 family                                                | -3.23 | 2.12E-05    | 0.001002638 |
| Pden_1735 | <i>efeB</i> | Dyp-type peroxidase family                                              | -1.26 | 5.98E-04    | 0.004987227 |
| Pden_1736 | <i>efeO</i> | protein of unknown function DUF451                                      | -2.37 | 1.33E-04    | 0.002284717 |
| Pden_1742 | <i>dtl</i>  | D-tyrosyl-tRNA(Tyr) deacylase                                           | 1.81  | 0.001143421 | 0.007373321 |
| Pden_1747 |             | ABC transporter related protein                                         | 1.94  | 7.79E-04    | 0.00579407  |
| Pden_1761 |             | protein of unknown function DUF6, transmembrane                         | 1.14  | 0.001684206 | 0.009443117 |
| Pden_1783 |             | signal transduction histidine kinase, glucose-6-phosphate specific      | -1.95 | 7.67E-04    | 0.005759382 |
| Pden_1784 |             | two component transcriptional regulator, LuxR family                    | -1.96 | 2.01E-04    | 0.002747242 |
| Pden_1792 |             | ribonuclease                                                            | 1.33  | 3.25E-04    | 0.003563965 |
| Pden_1793 | <i>yacG</i> | protein of unknown function DUF329                                      | 1.81  | 2.09E-04    | 0.00277756  |
| Pden_1795 |             | Allergen V5/Tpx-1 family protein                                        | -1.32 | 0.001315497 | 0.008082965 |
| Pden_1814 |             | Patatin                                                                 | 2.24  | 0.001272614 | 0.007904108 |
| Pden_1815 | <i>prfB</i> | bacterial peptide chain release factor 2 (bRF-2)                        | 1.39  | 3.32E-04    | 0.003583012 |



|           |             |                                                                       |       |             |             |
|-----------|-------------|-----------------------------------------------------------------------|-------|-------------|-------------|
| Pden_1839 | <i>lolD</i> | ABC transporter related protein                                       | 2.06  | 6.76E-04    | 0.005314314 |
| Pden_1860 | <i>plsX</i> | phosphate:acyl-[acyl carrier protein] acyltransferase                 | 1.78  | 5.43E-04    | 0.004701006 |
| Pden_1861 | <i>fabH</i> | 3-oxoacyl-[acyl-carrier-protein] synthase III                         | 2.65  | 1.04E-04    | 0.002056763 |
| Pden_1863 | <i>ihfA</i> | integration host factor, alpha subunit                                | -1.15 | 0.001548992 | 0.008983446 |
| Pden_1879 | <i>carB</i> | carbamoyl-phosphate synthase large subunit                            | 2.31  | 4.83E-05    | 0.0014723   |
| Pden_1899 | <i>choX</i> | Substrate-binding region of ABC-type glycine betaine transport system | -1.49 | 0.001566845 | 0.009040019 |
| Pden_1901 | <i>choV</i> | ABC transporter related protein                                       | -1.59 | 5.85E-04    | 0.004954272 |
| Pden_1922 |             | hypothetical protein                                                  | 1.41  | 3.94E-04    | 0.003899314 |
| Pden_1923 |             | ATP phosphoribosyltransferase catalytic subunit                       | 2.31  | 6.19E-04    | 0.005085057 |
| Pden_1924 |             | ATP phosphoribosyltransferase regulatory subunit                      | 1.91  | 1.96E-04    | 0.002717725 |
| Pden_1925 | <i>hisS</i> | histidyl-tRNA synthetase                                              | 1.33  | 0.001579552 | 0.009052351 |
| Pden_1926 |             | conserved hypothetical protein                                        | -1.69 | 0.001466317 | 0.008690206 |
| Pden_1929 | <i>gatB</i> | aspartyl/glutamyl-tRNA(Asn/Gln) amidotransferase subunit B            | 1.37  | 0.001254743 | 0.007826119 |
| Pden_1933 |             | O-acetylhomoserine sulfhydrylase                                      | -1.72 | 6.08E-04    | 0.005040533 |
| Pden_1954 |             | SAM-dependent methyltransferase                                       | 1.97  | 4.83E-04    | 0.004368669 |
| Pden_1956 |             | putative PAS/PAC sensor protein                                       | 1.73  | 3.63E-04    | 0.003710722 |
| Pden_1962 |             | hypothetical protein                                                  | 5.68  | 0.001218577 | 0.007673704 |
| Pden_1975 |             | hypothetical protein                                                  | 2.67  | 1.44E-04    | 0.00231305  |
| Pden_1985 |             | pterin-4-alpha-carbinolamine dehydratase                              | -1.44 | 0.001582363 | 0.009052351 |
| Pden_2005 |             | AMP-dependent synthetase and ligase                                   | -1.90 | 1.71E-04    | 0.002579539 |
| Pden_2026 |             | acetyl-CoA acetyltransferase                                          | -1.70 | 8.08E-04    | 0.005905824 |
| Pden_2034 |             | toluene tolerance family protein                                      | -1.18 | 0.001149032 | 0.007373321 |
| Pden_2040 |             | GCN5-related N-acetyltransferase                                      | 1.89  | 3.53E-04    | 0.003644311 |
| Pden_2041 | <i>argD</i> | acetylmethionine aminotransferase apoenzyme                           | 1.93  | 6.73E-05    | 0.001728981 |
| Pden_2046 |             | TonB-dependent receptor                                               | -1.74 | 1.77E-04    | 0.002605071 |
| Pden_2047 | <i>rocF</i> | arginase                                                              | -1.60 | 3.50E-04    | 0.003644311 |
| Pden_2058 |             | conserved hypothetical protein                                        | 1.85  | 1.27E-04    | 0.0022686   |
| Pden_2064 |             | phage terminase, small subunit, putative, P27 family                  | 2.16  | 6.16E-04    | 0.005082021 |
| Pden_2068 |             | ParB domain protein nuclease                                          | 2.52  | 7.16E-05    | 0.00178563  |
| Pden_2072 |             | hypothetical protein                                                  | 2.82  | 2.12E-04    | 0.002800179 |
| Pden_2078 |             | hypothetical protein                                                  | -2.21 | 0.001334795 | 0.008161915 |
| Pden_2082 |             | conserved hypothetical protein                                        | 2.34  | 0.001493028 | 0.008800002 |
| Pden_2093 |             | 3-deoxy-D-manno-octulosonic-acid transferase-like protein             | 1.90  | 6.52E-04    | 0.005207841 |
| Pden_2101 |             | DNA methylase N-4/N-6 domain protein                                  | -1.52 | 9.95E-04    | 0.006767899 |
| Pden_2119 | <i>rfbA</i> | Glucose-1-phosphate thymidyltransferase                               | 1.67  | 0.001230011 | 0.007708806 |
| Pden_2120 | <i>rfbD</i> | dTDP-4-dehydrorhamnose reductase                                      | 1.95  | 3.80E-04    | 0.00382151  |
| Pden_2121 | <i>rfbB</i> | dTDP-glucose 4,6-dehydratase                                          | 1.08  | 0.001066507 | 0.004049252 |
| Pden_2125 |             | ABC-2 type transporter                                                | 1.74  | 0.001310916 | 0.008074414 |
| Pden_2127 |             | ABC transporter related protein                                       | 1.75  | 9.73E-04    | 0.00671291  |
| Pden_2131 |             | GCN5-related N-acetyltransferase                                      | 1.85  | 8.36E-04    | 0.006066726 |
| Pden_2142 | <i>lexA</i> | SOS-response transcriptional repressor, LexA                          | 1.81  | 5.04E-04    | 0.004472377 |
| Pden_2147 |             | beta-lactamase domain protein                                         | 1.11  | 0.001023976 | 0.006875847 |
| Pden_2164 |             | GatB/Yqey domain protein                                              | 1.54  | 2.31E-04    | 0.002927163 |
| Pden_2165 | <i>carA</i> | carbamoyl-phosphate synthase small subunit                            | 1.63  | 3.36E-04    | 0.003607393 |
| Pden_2166 |             | General secretory system II, protein E domain protein                 | 2.57  | 1.21E-04    | 0.002215935 |
| Pden_2172 |             | peptidase M48, Ste24p                                                 | -1.21 | 0.001149015 | 0.007373321 |
| Pden_2183 | <i>aspS</i> | aspartyl-tRNA synthetase                                              | 1.66  | 4.99E-04    | 0.0044545   |
| Pden_2204 |             | conserved hypothetical protein                                        | -1.16 | 8.63E-04    | 0.006186303 |
| Pden_2225 |             | propionyl-CoA synthetase                                              | -2.37 | 2.23E-04    | 0.002861957 |
| Pden_2226 | <i>aroA</i> | 3-phosphoshikimate 1-carboxyvinyltransferase                          | 2.03  | 2.04E-04    | 0.002760804 |
| Pden_2251 |             | conserved hypothetical protein                                        | 2.20  | 2.49E-04    | 0.003045163 |
| Pden_2252 | <i>uvrA</i> | Excinuclease ABC subunit A                                            | 1.76  | 8.43E-05    | 0.0019055   |
| Pden_2255 |             | conserved hypothetical protein                                        | -1.27 | 6.35E-04    | 0.005138409 |
| Pden_2257 |             | succinate semialdehyde dehydrogenase                                  | -1.88 | 2.29E-04    | 0.002907856 |
| Pden_2262 | <i>pheT</i> | phenylalanyl-tRNA synthetase beta subunit                             | 1.88  | 1.49E-04    | 0.002343273 |
| Pden_2272 |             | cytochrome P450                                                       | 2.13  | 3.30E-04    | 0.003583012 |
| Pden_2275 |             | hypothetical protein                                                  | 2.24  | 6.57E-05    | 0.001699507 |
| Pden_2276 | <i>pyk</i>  | pyruvate kinase                                                       | 1.82  | 1.35E-04    | 0.002284871 |
| Pden_2285 | <i>choX</i> | Substrate-binding region of ABC-type glycine betaine transport system | -2.24 | 8.52E-04    | 0.006144644 |
| Pden_2287 |             | membrane protein of unknown function UCP014873                        | 1.67  | 0.001600246 | 0.009093208 |
| Pden_2292 |             | conserved hypothetical protein                                        | 1.79  | 0.001029438 | 0.006894242 |
| Pden_2293 |             | glycosyl transferase, family 14                                       | 2.27  | 5.29E-05    | 0.001560115 |
| Pden_2294 |             | conserved hypothetical protein                                        | 1.83  | 1.72E-04    | 0.002586479 |
| Pden_2297 |             | UDP-glucose pyrophosphorylase                                         | -1.25 | 0.001455272 | 0.008637796 |
| Pden_2327 |             | protein of unknown function DUF1428                                   | -2.48 | 0.001052695 | 0.006987997 |
| Pden_2328 |             | Glyoxalase/bleomycin resistance protein/dioxygenase                   | -1.93 | 1.33E-04    | 0.002284871 |
| Pden_2336 | <i>mnmD</i> | protein of unknown function DUF752                                    | 1.83  | 7.92E-04    | 0.005842821 |
| Pden_2338 |             | 4-aminobutyrate aminotransferase apoenzyme                            | -1.94 | 8.68E-04    | 0.006205608 |
| Pden_2351 |             | conserved hypothetical protein                                        | -1.46 | 4.71E-04    | 0.004312253 |
| Pden_2354 |             | two component transcriptional regulator, LuxR family                  | -3.35 | 2.06E-04    | 0.002764361 |
| Pden_2359 | <i>pqqE</i> | coenzyme PQQ biosynthesis protein E                                   | -2.06 | 9.61E-04    | 0.006680258 |
| Pden_2360 | <i>pqqD</i> | coenzyme PQQ synthesis D                                              | -2.60 | 7.14E-05    | 0.00178563  |
| Pden_2361 | <i>pqqC</i> | coenzyme PQQ biosynthesis protein C                                   | -3.02 | 2.63E-05    | 0.001142137 |
| Pden_2362 | <i>pqqB</i> | coenzyme PQQ biosynthesis protein B                                   | -2.93 | 1.17E-04    | 0.002162707 |
| Pden_2366 | <i>adh</i>  | Aldehyde dehydrogenase (NAD(+))                                       | -4.07 | 0.001661323 | 0.009345864 |
| Pden_2367 | <i>adhP</i> | Alcohol dehydrogenase GroES domain protein                            | -3.17 | 2.92E-04    | 0.003349127 |
| Pden_2368 |             | protein of unknown function DUF779                                    | -3.33 | 0.001584117 | 0.009052351 |
| Pden_2380 |             | metallophosphoesterase                                                | 1.47  | 4.02E-04    | 0.003919705 |
| Pden_2386 |             | 2,3-dihydroxybenzoate-AMP ligase                                      | -1.48 | 0.001274921 | 0.007904108 |
| Pden_2393 | <i>gndA</i> | 6-phosphogluconate dehydrogenase (decarboxylating)                    | 2.34  | 0.001381129 | 0.008334513 |
| Pden_2394 |             | hypothetical protein                                                  | 3.63  | 4.29E-05    | 0.001441542 |

|           |             |                                                                         |       |             |             |
|-----------|-------------|-------------------------------------------------------------------------|-------|-------------|-------------|
| Pden_2395 |             | hypothetical protein                                                    | 1.30  | 0.001213854 | 0.00765348  |
| Pden_2406 | <i>ddl</i>  | D-alanine-D-alanine ligase                                              | -1.82 | 0.001087746 | 0.007124523 |
| Pden_2414 |             | hypothetical protein                                                    | -2.56 | 6.42E-04    | 0.005154003 |
| Pden_2428 |             | hypothetical protein                                                    | 2.53  | 3.92E-04    | 0.003894981 |
| Pden_2443 | <i>tssB</i> | Uncharacterized conserved protein UCP028301                             | -2.57 | 2.82E-04    | 0.003317154 |
| Pden_2444 | <i>tssC</i> | protein of unknown function DUF877                                      | -2.70 | 3.62E-04    | 0.003710685 |
| Pden_2459 |             | OmpA/MotB domain protein                                                | -2.32 | 0.001189961 | 0.007559311 |
| Pden_2468 |             | cation diffusion facilitator family transporter                         | 2.72  | 3.77E-04    | 0.003809005 |
| Pden_2469 |             | carbohydrate ABC transporter ATP-binding protein, CUT1 family           | -1.64 | 3.31E-04    | 0.003583012 |
| Pden_2470 |             | carbohydrate ABC transporter membrane protein 2, CUT1 family            | -2.46 | 7.75E-04    | 0.005785047 |
| Pden_2471 |             | carbohydrate ABC transporter membrane protein 1, CUT1 family            | -2.39 | 2.89E-04    | 0.003349127 |
| Pden_2472 |             | carbohydrate ABC transporter substrate-binding protein, CUT1 family     | -2.50 | 5.25E-05    | 0.001560115 |
| Pden_2483 |             | nitric oxide reductase, NorB subunit apoprotein                         | -1.93 | 6.01E-05    | 0.001626459 |
| Pden_2486 | <i>nirl</i> | FMN-binding domain protein                                              | 3.07  | 0.00102084  | 0.006863897 |
| Pden_2502 |             | protein of unknown function DUF81                                       | 2.75  | 1.77E-04    | 0.002605071 |
| Pden_2506 | <i>gpml</i> | phosphoglycerate mutase                                                 | 1.46  | 4.98E-04    | 0.0044545   |
| Pden_2547 |             | short-chain dehydrogenase/reductase SDR                                 | 2.54  | 1.45E-04    | 0.00231305  |
| Pden_2565 |             | putative esterase                                                       | -1.41 | 0.001748119 | 0.009652871 |
| Pden_2579 |             | Glutathione S-transferase, N-terminal domain                            | 2.23  | 0.0012438   | 0.007774516 |
| Pden_2591 | <i>rimP</i> | protein of unknown function DUF150                                      | 1.93  | 5.93E-05    | 0.001623926 |
| Pden_2592 | <i>nusA</i> | NusA antitermination factor                                             | 1.42  | 3.64E-04    | 0.003718072 |
| Pden_2593 |             | protein of unknown function DUF448                                      | 1.66  | 7.93E-04    | 0.005842821 |
| Pden_2594 | <i>infB</i> | bacterial translation initiation factor 2 (bIF-2)                       | 1.71  | 2.25E-04    | 0.00286665  |
| Pden_2629 |             | hypothetical protein                                                    | 3.24  | 0.001502047 | 0.008822351 |
| Pden_2649 | <i>fliF</i> | flagellar M-ring protein FliF                                           | 1.55  | 0.001306885 | 0.008059387 |
| Pden_2663 |             | acetyl-CoA acetyltransferase                                            | -2.34 | 2.09E-05    | 9.98E-04    |
| Pden_2664 |             | putative transcriptional regulator, ModE family                         | -1.94 | 3.10E-04    | 0.003479584 |
| Pden_2680 |             | glucokinase                                                             | 3.01  | 2.75E-05    | 0.001152121 |
| Pden_2681 |             | hypothetical protein                                                    | 2.27  | 3.51E-04    | 0.003644311 |
| Pden_2682 | <i>ahcY</i> | adenosylhomocysteinase                                                  | 1.11  | 0.001827499 | 0.009906452 |
| Pden_2703 |             | transposase, IS4 family                                                 | 2.00  | 1.49E-04    | 0.002343273 |
| Pden_2704 |             | transposase-like protein                                                | 2.08  | 1.35E-04    | 0.002284871 |
| Pden_2711 |             | conserved hypothetical protein                                          | -1.21 | 0.001753833 | 0.009672829 |
| Pden_2718 | <i>purH</i> | IMP cyclohydrolase                                                      | 1.72  | 5.68E-04    | 0.0048638   |
| Pden_2732 |             | protein of unknown function DUF81                                       | -1.19 | 0.001094611 | 0.007146149 |
| Pden_2741 |             | hypothetical protein                                                    | 2.88  | 0.001683368 | 0.009443117 |
| Pden_2743 | <i>efp</i>  | translation elongation factor P (EF-P)                                  | 2.92  | 1.31E-04    | 0.002284717 |
| Pden_2759 | <i>pnp</i>  | 3' exoribonuclease                                                      | 2.76  | 7.90E-05    | 0.001836392 |
| Pden_2775 | <i>asd</i>  | aspartate semialdehyde dehydrogenase                                    | 1.80  | 3.49E-04    | 0.003644311 |
| Pden_2803 |             | beta-lactamase domain protein                                           | -3.10 | 2.60E-04    | 0.003136054 |
| Pden_2830 |             | formate dehydrogenase (quinone-dependent) catalytic subunit             | -2.47 | 2.90E-04    | 0.003349127 |
| Pden_2831 |             | ferredoxin                                                              | -2.70 | 6.96E-05    | 0.001761223 |
| Pden_2832 |             | Rieske (2Fe-2S) domain protein                                          | -2.83 | 1.32E-04    | 0.002284717 |
| Pden_2852 | <i>pckA</i> | Phosphoenolpyruvate carboxykinase (ATP)                                 | -3.58 | 1.54E-04    | 0.002418481 |
| Pden_2856 | <i>fdhF</i> | formate dehydrogenase alpha subunit                                     | -2.21 | 4.73E-05    | 0.001471351 |
| Pden_2871 |             | 3-hydroxyacyl-CoA dehydrogenase                                         | -1.91 | 9.65E-04    | 0.006681372 |
| Pden_2876 | <i>atpF</i> | H+-transporting two-sector ATPase, B/B' subunit                         | 2.23  | 6.38E-04    | 0.005142188 |
| Pden_2877 | <i>atpF</i> | H+-transporting two-sector ATPase, B/B' subunit                         | 1.51  | 0.001587755 | 0.009052708 |
| Pden_2878 | <i>atpE</i> | ATP synthase F0 subcomplex C subunit                                    | 1.89  | 1.31E-04    | 0.002284717 |
| Pden_2906 |             | acyl-CoA dehydrogenase domain protein                                   | -1.84 | 0.001377924 | 0.008325092 |
| Pden_2908 |             | short-chain dehydrogenase/reductase SDR                                 | -2.12 | 6.90E-04    | 0.005364018 |
| Pden_2925 |             | iron-sulfur cluster binding protein                                     | -2.20 | 0.001438767 | 0.00859365  |
| Pden_2926 |             | protein of unknown function DUF224, cysteine-rich region domain protein | -3.84 | 0.00145438  | 0.008637796 |
| Pden_2927 |             | L-lactate transport                                                     | -3.87 | 3.79E-04    | 0.003819736 |
| Pden_2941 |             | efflux transporter, RND family, MFP subunit                             | 2.87  | 4.22E-04    | 0.004038296 |
| Pden_2942 |             | transporter, hydrophobe/amphiphile efflux-1 (HAE1) family               | 2.65  | 9.68E-05    | 0.002008388 |
| Pden_2943 |             | RND efflux system, outer membrane lipoprotein, NodT family              | 2.98  | 1.10E-04    | 0.002126235 |
| Pden_2948 |             | antifreeze protein, type I                                              | -1.69 | 0.001114057 | 0.007229223 |
| Pden_2970 | <i>rpsl</i> | SSU ribosomal protein S9P                                               | 3.03  | 1.39E-04    | 0.002302411 |
| Pden_2985 |             | transcriptional regulator, XRE family                                   | 2.43  | 9.35E-04    | 0.006564078 |
| Pden_2990 |             | two component transcriptional regulator, LuxR family                    | -2.67 | 1.78E-04    | 0.002605071 |
| Pden_3032 |             | ABC transporter related protein                                         | 1.47  | 5.76E-04    | 0.004898771 |
| Pden_3036 |             | sulphate transporter                                                    | 2.45  | 6.47E-05    | 0.001696353 |
| Pden_3049 |             | Transketolase, central region                                           | -1.35 | 6.25E-04    | 0.005101822 |
| Pden_3067 |             | conserved hypothetical protein                                          | 1.88  | 6.71E-04    | 0.005289506 |
| Pden_3071 |             | aconitase                                                               | -1.67 | 4.18E-04    | 0.004027362 |
| Pden_3073 |             | protein of unknown function DUF112, transmembrane                       | -3.79 | 2.42E-05    | 0.001105881 |
| Pden_3074 |             | putative tricarboxylic transport membrane protein                       | -5.47 | 9.46E-04    | 0.006621591 |
| Pden_3075 |             | Uncharacterized protein UPF0065                                         | -5.41 | 3.43E-05    | 0.001296365 |
| Pden_3077 |             | gene transfer agent (GTA) like protein                                  | 2.20  | 0.00152342  | 0.008897814 |
| Pden_3098 |             | nickel-dependent hydrogenase, large subunit                             | -3.00 | 0.001083457 | 0.007105623 |
| Pden_3099 |             | HupE/UreJ protein                                                       | -2.18 | 1.02E-04    | 0.002055734 |
| Pden_3108 | <i>hypB</i> | hydrogenase accessory protein HypB                                      | -1.78 | 2.19E-04    | 0.002830827 |
| Pden_3109 |             | two component, sigma54 specific, transcriptional regulator, Fis family  | -1.41 | 7.79E-04    | 0.00579407  |
| Pden_3111 | <i>hypD</i> | hydrogenase expression/formation protein HypD                           | -1.62 | 2.97E-04    | 0.003369347 |
| Pden_3113 |             | hypothetical protein                                                    | 1.43  | 6.95E-04    | 0.005377582 |
| Pden_3148 |             | protease Do                                                             | -1.23 | 7.83E-04    | 0.005805533 |
| Pden_3149 |             | Phytanoyl-CoA dioxygenase                                               | 3.07  | 7.56E-04    | 0.005693964 |
| Pden_3169 |             | hypothetical protein                                                    | 1.74  | 2.20E-04    | 0.002838625 |
| Pden_3170 |             | hypothetical protein                                                    | 1.92  | 6.93E-04    | 0.005373648 |
| Pden_3181 |             | conserved hypothetical protein                                          | 3.04  | 4.35E-05    | 0.001441542 |

|           |             |                                                                         |       |             |             |
|-----------|-------------|-------------------------------------------------------------------------|-------|-------------|-------------|
| Pden_3182 |             | C-5 cytosine-specific DNA methylase                                     | 1.88  | 6.27E-04    | 0.005114959 |
| Pden_3211 |             | aldehyde dehydrogenase                                                  | -1.30 | 0.001054816 | 0.006990226 |
| Pden_3219 | <i>dctP</i> | TRAP dicarboxylate transporter- DctP subunit                            | -2.00 | 6.89E-04    | 0.005364018 |
| Pden_3221 |             | Uncharacterized protein UPF0065                                         | -2.07 | 0.001439347 | 0.00859365  |
| Pden_3233 |             | transposase IS116/IS110/IS902 family protein                            | -1.74 | 3.09E-04    | 0.003477827 |
| Pden_3235 |             | conserved hypothetical protein                                          | -2.55 | 0.001771505 | 0.009725855 |
| Pden_3260 |             | aldehyde dehydrogenase                                                  | -1.86 | 1.01E-04    | 0.00205033  |
| Pden_3266 |             | Uncharacterized protein UPF0065                                         | -2.94 | 9.05E-05    | 0.001966924 |
| Pden_3267 |             | amidohydrolase 2                                                        | -2.16 | 5.80E-05    | 0.001613164 |
| Pden_3268 |             | protein of unknown function DUF112, transmembrane                       | -2.09 | 3.21E-04    | 0.003546894 |
| Pden_3271 |             | transcriptional regulator, LysR family                                  | -2.56 | 1.85E-05    | 9.57E-04    |
| Pden_3286 |             | cytochrome B561                                                         | -1.17 | 0.001823154 | 0.009896267 |
| Pden_3294 |             | Heavy metal transport/detoxification protein                            | -1.37 | 5.92E-04    | 0.004969545 |
| Pden_3295 |             | heavy metal translocating P-type ATPase                                 | -1.99 | 1.11E-04    | 0.00212942  |
| Pden_3302 |             | transcriptional regulator, TetR family                                  | 2.78  | 0.001035658 | 0.006917597 |
| Pden_3327 |             | hypothetical protein                                                    | 3.10  | 2.85E-04    | 0.003327115 |
| Pden_3344 |             | sulphate transporter                                                    | 3.11  | 6.77E-06    | 5.44E-04    |
| Pden_3345 |             | protein of unknown function DUF1127                                     | 3.17  | 2.19E-04    | 0.002830827 |
| Pden_3351 |             | Methyltransferase type 11                                               | 1.80  | 1.82E-04    | 0.002639452 |
| Pden_3357 |             | DNA methylase N-4/N-6 domain protein                                    | 2.49  | 1.14E-04    | 0.002162073 |
| Pden_3377 |             | conserved hypothetical protein                                          | 1.66  | 0.001774624 | 0.009725855 |
| Pden_3386 |             | cyclase family protein                                                  | -1.97 | 3.35E-04    | 0.003605638 |
| Pden_3387 |             | TRAP dicarboxylate transporter, DctP subunit                            | -2.48 | 0.001027972 | 0.006893537 |
| Pden_3400 |             | molybdenum cofactor synthesis domain                                    | 3.41  | 1.08E-05    | 7.37E-04    |
| Pden_3407 | <i>ugpC</i> | carbohydrate ABC transporter ATP-binding protein, CUT1 family           | 1.63  | 8.39E-04    | 0.006076562 |
| Pden_3411 |             | hypothetical protein                                                    | 2.13  | 2.38E-04    | 0.00295528  |
| Pden_3424 |             | dihydrodipicolinate synthetase                                          | -1.19 | 0.001053099 | 0.006987997 |
| Pden_3425 |             | branched chain amino acid: 2-keto-4-methylthiobutyrate aminotransferase | -1.30 | 0.001325057 | 0.008112171 |
| Pden_3428 |             | Tripartite ATP-independent periplasmic transporter, DctQ component      | -2.27 | 3.99E-04    | 0.003909759 |
| Pden_3429 |             | TRAP dicarboxylate transporter, DctM subunit                            | -2.37 | 5.52E-05    | 0.001611959 |
| Pden_3430 | <i>pxpB</i> | Allophanate hydrolase subunit 1                                         | -1.71 | 9.46E-04    | 0.006621591 |
| Pden_3447 |             | efflux transporter, RND family, MFP subunit                             | -1.73 | 1.69E-04    | 0.002560706 |
| Pden_3448 |             | transporter, hydrophobe/amphiphile efflux-1 (HAE1) family               | -1.68 | 2.46E-04    | 0.003014888 |
| Pden_3450 |             | beta-lactamase                                                          | -2.99 | 4.65E-05    | 0.00146383  |
| Pden_3463 |             | FAD-dependent pyridine nucleotide-disulfide oxidoreductase              | 1.28  | 8.28E-04    | 0.006025401 |
| Pden_3464 |             | ferredoxin                                                              | -1.49 | 0.001070733 | 0.007067956 |
| Pden_3465 |             | Rieske (2Fe-2S) domain protein                                          | -2.34 | 5.80E-04    | 0.004918563 |
| Pden_3480 |             | TRAP dicarboxylate transporter, DctP subunit                            | -3.75 | 6.08E-04    | 0.005040533 |
| Pden_3481 |             | Tripartite ATP-independent periplasmic transporter, DctQ component      | -2.58 | 2.93E-05    | 0.001194403 |
| Pden_3482 |             | TRAP dicarboxylate transporter, DctM subunit                            | -2.00 | 2.35E-04    | 0.002938416 |
| Pden_3497 |             | TRAP dicarboxylate transporter- DctP subunit                            | -2.31 | 8.38E-05    | 0.001901969 |
| Pden_3513 |             | transcriptional regulator, LysR family                                  | 1.37  | 9.81E-04    | 0.006721522 |
| Pden_3521 |             | TonB-dependent siderophore receptor                                     | -2.31 | 5.19E-04    | 0.00455594  |
| Pden_3537 |             | short-chain dehydrogenase/reductase SDR                                 | -3.71 | 7.87E-05    | 0.001836392 |
| Pden_3538 |             | TRAP-T family transporter, DctQ (4 TMs) subunit                         | -3.94 | 2.18E-04    | 0.002830827 |
| Pden_3539 |             | TRAP dicarboxylate transporter, DctM subunit                            | -3.86 | 8.98E-04    | 0.006350061 |
| Pden_3540 |             | TRAP dicarboxylate transporter- DctP subunit                            | -4.67 | 2.91E-04    | 0.003349127 |
| Pden_3541 |             | short-chain dehydrogenase/reductase SDR                                 | -3.99 | 1.26E-04    | 0.00226507  |
| Pden_3542 |             | short-chain dehydrogenase/reductase SDR                                 | -3.61 | 2.78E-04    | 0.003283054 |
| Pden_3543 |             | fumarate reductase/succinate dehydrogenase flavoprotein domain protein  | -3.42 | 3.88E-04    | 0.003876944 |
| Pden_3544 |             | hypothetical protein                                                    | -2.80 | 6.12E-04    | 0.005066185 |
| Pden_3550 | <i>pseF</i> | acylnneuraminatyl cytidyltransferase                                    | 1.49  | 7.53E-04    | 0.005688481 |
| Pden_3551 |             | flagellin modification protein FlmD                                     | 1.36  | 7.95E-04    | 0.005849634 |
| Pden_3557 | <i>pseC</i> | DegT/DnrJ/EryC1/StrS aminotransferase                                   | 1.54  | 6.46E-04    | 0.005176075 |
| Pden_3568 |             | integral membrane sensor signal transduction histidine kinase           | -2.07 | 3.53E-04    | 0.003644311 |
| Pden_3574 |             | amino acid/amide ABC transporter substrate-binding protein, HAAT family | -4.28 | 1.94E-04    | 0.002717725 |
| Pden_3575 |             | amino acid/amide ABC transporter membrane protein 1, HAAT family        | -4.70 | 4.48E-04    | 0.004203157 |
| Pden_3577 |             | 3-hydroxyacyl-CoA dehydrogenase, NAD-binding protein                    | -2.43 | 8.79E-04    | 0.006260085 |
| Pden_3578 |             | protein of unknown function DUF849                                      | -2.70 | 0.001772721 | 0.009725855 |
| Pden_3582 |             | response regulator receiver protein                                     | -1.92 | 0.001372627 | 0.008312932 |
| Pden_3583 |             | short-chain dehydrogenase/reductase SDR                                 | -2.05 | 4.86E-04    | 0.004381203 |
| Pden_3584 |             | FAD-linked oxidoreductase                                               | -1.97 | 2.67E-04    | 0.003191705 |
| Pden_3585 | <i>eutH</i> | Ethanolamine utilization protein, EutH                                  | -2.45 | 5.12E-04    | 0.004509969 |
| Pden_3586 |             | transglutaminase domain protein                                         | -1.47 | 4.99E-04    | 0.0044545   |
| Pden_3601 |             | Fibronectin, type III domain protein                                    | 1.67  | 6.87E-04    | 0.005364018 |
| Pden_3604 |             | hypothetical protein                                                    | 1.48  | 9.67E-04    | 0.006681372 |
| Pden_3608 |             | hypothetical protein                                                    | 4.03  | 1.52E-05    | 8.86E-04    |
| Pden_3615 |             | Glyoxalase/bleomycin resistance protein/dioxygenase                     | 3.06  | 3.14E-04    | 0.003513638 |
| Pden_3633 |             | isovaleryl-CoA dehydrogenase                                            | -1.52 | 0.00158145  | 0.009052351 |
| Pden_3643 |             | major facilitator superfamily MFS_1                                     | 4.92  | 6.29E-04    | 0.005116599 |
| Pden_3652 |             | ABC transporter related protein                                         | 1.64  | 8.67E-04    | 0.006205608 |
| Pden_3662 |             | FMN adenyltransferase / riboflavin kinase                               | 1.80  | 4.46E-04    | 0.004192833 |
| Pden_3674 |             | NUDIX hydrolase                                                         | 2.08  | 8.77E-05    | 0.001937938 |
| Pden_3675 |             | conserved hypothetical protein                                          | 1.72  | 0.001003319 | 0.006795278 |
| Pden_3678 |             | homoserine dehydrogenase                                                | 1.49  | 5.69E-04    | 0.004864184 |
| Pden_3695 |             | GCN5-related N-acetyltransferase                                        | -1.28 | 6.70E-04    | 0.005289506 |
| Pden_3698 | <i>trmJ</i> | RNA methyltransferase, TrmH family, group 1                             | 2.72  | 1.15E-04    | 0.002162707 |
| Pden_3701 | <i>miaB</i> | tRNA-(6)A37 thiotransferase enzyme MiaB                                 | 2.00  | 3.60E-04    | 0.00370427  |
| Pden_3712 | <i>secG</i> | protein translocase subunit secG                                        | 2.32  | 9.50E-05    | 0.001988942 |
| Pden_3714 |             | short-chain dehydrogenase/reductase SDR                                 | 1.64  | 0.00171384  | 0.009545843 |
| Pden_3720 |             | diguanylate cyclase                                                     | 1.31  | 0.001467534 | 0.008690206 |

|           |              |                                                                                             |   |       |             |             |
|-----------|--------------|---------------------------------------------------------------------------------------------|---|-------|-------------|-------------|
| Pden_3725 | <i>tsf</i>   | translation elongation factor Ts (EF-Ts)                                                    |   | 1.94  | 7.33E-04    | 0.005580508 |
| Pden_3746 |              | putative transcriptional regulator, XRE family                                              | 4 | -1.58 | 0.001472743 | 0.008710862 |
| Pden_3748 |              | hypothetical protein                                                                        | 4 | 2.61  | 1.36E-04    | 0.002288892 |
| Pden_3750 |              | hypothetical protein                                                                        | 4 | 1.73  | 8.76E-04    | 0.006243388 |
| Pden_3751 |              | conserved hypothetical protein                                                              | 4 | 2.21  | 0.001392111 | 0.008380808 |
| Pden_3758 |              | hypothetical protein                                                                        | 4 | 1.72  | 4.22E-04    | 0.004038296 |
| Pden_3784 | <i>cmk</i>   | cytidylate kinase                                                                           |   | 2.47  | 8.90E-04    | 0.006310843 |
| Pden_3785 |              | 2-nitropropane dioxygenase, NPD                                                             |   | 2.38  | 5.49E-04    | 0.004745206 |
| Pden_3796 |              | Xanthine/uracil/vitamin C permease                                                          |   | -1.97 | 4.32E-04    | 0.004092226 |
| Pden_3800 |              | extracellular solute-binding protein, family 5                                              |   | -2.08 | 9.41E-05    | 0.001988942 |
| Pden_3801 |              | binding-protein-dependent transport systems inner membrane component                        |   | -1.15 | 0.001597963 | 0.009090436 |
| Pden_3802 |              | binding-protein-dependent transport systems inner membrane component                        |   | -1.24 | 0.001763187 | 0.009703278 |
| Pden_3811 | <i>mfd</i>   | transcription-repair coupling factor                                                        |   | 1.49  | 4.64E-04    | 0.004286287 |
| Pden_3812 | <i>clpA</i>  | ATP-dependent Clp protease, ATP-binding subunit clpA                                        |   | -1.87 | 4.01E-04    | 0.003919705 |
| Pden_3819 | <i>atpC</i>  | ATP synthase F1 subcomplex epsilon subunit                                                  |   | 1.37  | 8.60E-04    | 0.006174412 |
| Pden_3824 |              | CoA-binding domain protein                                                                  |   | -2.87 | 3.98E-04    | 0.003908229 |
| Pden_3828 |              | hypothetical protein                                                                        |   | 4.59  | 4.71E-04    | 0.004312253 |
| Pden_3829 |              | hypothetical protein                                                                        |   | 3.90  | 2.97E-06    | 3.07E-04    |
| Pden_3834 |              | hypothetical protein                                                                        |   | 3.13  | 4.49E-04    | 0.004204226 |
| Pden_3849 |              | phage integrase family protein                                                              |   | -2.89 | 0.001850915 | 0.0099906   |
| Pden_3851 |              | hypothetical protein                                                                        |   | 2.84  | 5.00E-04    | 0.0044545   |
| Pden_3852 |              | hypothetical protein                                                                        |   | 2.69  | 1.74E-04    | 0.002604995 |
| Pden_3853 |              | hypothetical protein                                                                        |   | 2.10  | 5.01E-04    | 0.004457229 |
| Pden_3855 |              | hypothetical protein                                                                        |   | 5.18  | 0.001527064 | 0.008907286 |
| Pden_3856 |              | Substrate-binding region of ABC-type glycine betaine transport system                       |   | 1.34  | 7.67E-04    | 0.004759382 |
| Pden_3857 |              | binding-protein-dependent transport systems inner membrane component                        |   | 1.99  | 6.97E-04    | 0.005387495 |
| Pden_3860 |              | NUDIX hydrolase                                                                             |   | 2.80  | 3.20E-04    | 0.003546894 |
| Pden_3867 |              | DedA family protein                                                                         |   | 2.32  | 0.001761605 | 0.009703278 |
| Pden_3868 |              | zinc metalloproteinase putative                                                             |   | -1.62 | 0.001298928 | 0.008020086 |
| Pden_3871 |              | conserved hypothetical protein                                                              |   | 2.34  | 6.19E-04    | 0.005085057 |
| Pden_3872 | <i>gdhA</i>  | glutamate dehydrogenase (NADP)                                                              |   | 2.94  | 9.34E-04    | 0.006564078 |
| Pden_3874 |              | conserved hypothetical protein                                                              |   | 1.82  | 2.91E-04    | 0.003349127 |
| Pden_3887 |              | chromosome partitioning protein                                                             |   | 1.43  | 8.18E-04    | 0.005967453 |
| Pden_3895 |              | conserved hypothetical protein                                                              |   | -1.50 | 0.001355938 | 0.008232592 |
| Pden_3916 |              | amidohydrolase                                                                              |   | -2.78 | 6.31E-05    | 0.001673359 |
| Pden_3917 |              | uracil-xanthine permease                                                                    |   | -3.27 | 2.50E-04    | 0.003045163 |
| Pden_3918 | <i>bhcD</i>  | ornithine cyclodeaminase                                                                    |   | -1.70 | 8.23E-04    | 0.005993794 |
| Pden_3926 | <i>purM</i>  | phosphoribosylformylglycinamide cyclo-ligase                                                |   | 1.74  | 9.63E-04    | 0.006681372 |
| Pden_3927 | <i>purN</i>  | formyltetrahydrofolate-dependent phosphoribosylglycinamide formyltransferase                |   | 1.49  | 2.38E-04    | 0.00295528  |
| Pden_3932 |              | amino acid/amide ABC transporter substrate-binding protein, HAAT family                     |   | -2.82 | 7.81E-05    | 0.001836392 |
| Pden_3936 | <i>gmk</i>   | guanylate kinase                                                                            |   | 1.45  | 0.001005266 | 0.006795278 |
| Pden_3951 |              | Radical SAM domain protein                                                                  |   | 3.64  | 4.77E-05    | 0.001471144 |
| Pden_3971 | <i>purL</i>  | phosphoribosylformylglycinamide synthase subunit II                                         |   | 1.65  | 2.84E-04    | 0.003327115 |
| Pden_3976 |              | conserved hypothetical protein                                                              |   | 2.14  | 4.14E-04    | 0.004011589 |
| Pden_3988 |              | VWA containing CoxE family protein                                                          |   | 1.36  | 4.75E-04    | 0.004327427 |
| Pden_3989 |              | Ppx/GppA phosphatase                                                                        |   | 1.89  | 0.001823665 | 0.009896267 |
| Pden_3997 | <i>dxr</i>   | 1-deoxy-D-xylulose 5-phosphate reductoisomerase                                             |   | 1.58  | 8.69E-04    | 0.006205608 |
| Pden_4002 |              | Penicillin amidase                                                                          |   | 2.29  | 1.03E-04    | 0.002055734 |
| Pden_4003 |              | 3-hydroxyisobutyrate dehydrogenase                                                          |   | -1.34 | 3.73E-04    | 0.003774183 |
| Pden_4025 | <i>typA</i>  | GTP-binding protein TypA                                                                    |   | 1.84  | 1.41E-04    | 0.00230248  |
| Pden_4027 |              | ferredoxin                                                                                  |   | 1.60  | 0.001353816 | 0.008232592 |
| Pden_4029 | <i>purD</i>  | phosphoribosylamine-glycine ligase                                                          |   | 2.05  | 7.02E-04    | 0.005417368 |
| Pden_4032 | <i>mreB</i>  | rod shape-determining protein MreB                                                          |   | 1.79  | 2.12E-04    | 0.002800179 |
| Pden_4033 | <i>mreC</i>  | rod shape-determining protein MreC                                                          |   | 1.98  | 1.00E-04    | 0.00205033  |
| Pden_4049 |              | protein of unknown function DUF1498                                                         |   | -1.69 | 3.61E-04    | 0.00370427  |
| Pden_4051 | <i>glcB</i>  | Malate synthase                                                                             |   | 1.36  | 5.89E-04    | 0.004960806 |
| Pden_4055 | <i>proB</i>  | glutamate 5-kinase                                                                          |   | 2.46  | 8.34E-04    | 0.006055957 |
| Pden_4074 |              | transcriptional regulator, TetR family                                                      |   | 2.40  | 5.91E-04    | 0.004969545 |
| Pden_4078 | <i>trmFO</i> | gid protein                                                                                 |   | 2.45  | 4.45E-05    | 0.001443847 |
| Pden_4101 |              | GCN5-related N-acetyltransferase                                                            |   | 1.56  | 6.53E-04    | 0.005207841 |
| Pden_4122 |              | TRAP dicarboxylate transporter, DctP subunit                                                |   | -3.97 | 0.001590823 | 0.009059996 |
| Pden_4136 |              | hypothetical protein                                                                        |   | -1.79 | 7.18E-04    | 0.005491965 |
| Pden_4140 |              | periplasmic solute binding protein                                                          |   | 1.57  | 0.001582917 | 0.009052351 |
| Pden_4141 |              | hypothetical protein                                                                        |   | -2.61 | 8.08E-04    | 0.005905824 |
| Pden_4143 | <i>tadA</i>  | CMP/dCMP deaminase, zinc-binding protein                                                    |   | 1.55  | 4.91E-04    | 0.004414551 |
| Pden_4149 |              | thioredoxin SoxW                                                                            |   | -1.33 | 7.77E-04    | 0.005793374 |
| Pden_4150 | <i>soxX</i>  | monoheme cytochrome SoxX (sulfur oxidation)                                                 |   | -3.34 | 1.19E-05    | 7.68E-04    |
| Pden_4151 | <i>soxY</i>  | thiosulfate-binding protein SoxY                                                            |   | -3.18 | 1.58E-04    | 0.002456618 |
| Pden_4153 | <i>soxA</i>  | diheme cytochrome SoxA (sulfur oxidation)                                                   |   | -3.09 | 1.39E-04    | 0.002302411 |
| Pden_4154 | <i>soxB</i>  | sulfate thiol esterase SoxB                                                                 |   | -1.53 | 0.001586503 | 0.009052708 |
| Pden_4167 |              | ABC transporter related protein                                                             |   | 1.76  | 9.78E-04    | 0.006721522 |
| Pden_4169 |              | putative sulfonate/nitrate transport system substrate-binding protein                       |   | 2.39  | 4.73E-04    | 0.004322322 |
| Pden_4177 |              | Mannitol dehydrogenase, C-terminal domain                                                   |   | -2.37 | 3.98E-04    | 0.003908229 |
| Pden_4178 |              | mannitol ABC transporter ATP-binding protein / sorbitol ABC transporter ATP-binding protein |   | -2.58 | 1.66E-04    | 0.002544325 |
| Pden_4179 |              | sorbitol ABC transporter membrane protein / mannitol ABC transporter membrane protein       |   | -2.67 | 8.07E-05    | 0.001856381 |
| Pden_4180 |              | mannitol ABC transporter membrane protein / sorbitol ABC transporter membrane protein       |   | -3.42 | 1.99E-04    | 0.002746744 |
| Pden_4181 |              | mannitol-binding protein / sorbitol-binding protein                                         |   | -3.05 | 5.30E-05    | 0.001560115 |
| Pden_4182 | <i>queF</i>  | GTP cyclohydrolase I                                                                        |   | 3.43  | 7.48E-05    | 0.001812039 |
| Pden_4183 | <i>queE</i>  | preQ(0) biosynthesis protein QueE                                                           |   | 4.41  | 5.50E-06    | 4.66E-04    |
| Pden_4184 |              | 6-pyruvoyl tetrahydropterin synthase and hypothetical protein                               |   | 4.20  | 3.41E-06    | 3.39E-04    |
| Pden_4185 | <i>queC</i>  | exsB protein                                                                                |   | 4.37  | 2.25E-05    | 0.001055027 |

|           |              |                                                                                  |       |             |             |
|-----------|--------------|----------------------------------------------------------------------------------|-------|-------------|-------------|
| Pden_4187 | <i>ugpC</i>  | carbohydrate ABC transporter ATP-binding protein, CUT1 family                    | -1.33 | 0.001645176 | 0.009296344 |
| Pden_4188 | <i>ugpE</i>  | carbohydrate ABC transporter membrane protein 2, CUT1 family                     | -2.42 | 0.001449945 | 0.008636553 |
| Pden_4189 | <i>ugpA</i>  | carbohydrate ABC transporter membrane protein 1, CUT1 family                     | -2.66 | 4.28E-05    | 0.001441542 |
| Pden_4190 | <i>ugpB</i>  | carbohydrate ABC transporter substrate-binding protein, CUT1 family              | -2.83 | 1.13E-05    | 7.46E-04    |
| Pden_4210 |              | response regulator receiver protein                                              | -2.20 | 0.001321453 | 0.0080999   |
| Pden_4211 |              | SSS sodium solute transporter superfamily                                        | -2.78 | 6.54E-04    | 0.005207841 |
| Pden_4213 | <i>acs</i>   | acetyl-coenzyme A synthetase                                                     | -2.83 | 1.12E-05    | 7.46E-04    |
| Pden_4221 |              | hypothetical protein                                                             | 3.24  | 0.001095282 | 0.007146149 |
| Pden_4226 |              | 3-octaprenyl-4-hydroxybenzoate decarboxylase                                     | 2.53  | 0.00181163  | 0.009873285 |
| Pden_4227 |              | conserved hypothetical protein                                                   | 3.27  | 4.60E-04    | 0.004272675 |
| Pden_4228 | <i>ubiU</i>  | peptidase U32                                                                    | 2.33  | 3.68E-04    | 0.003739575 |
| Pden_4229 | <i>ubiV</i>  | peptidase U32                                                                    | 1.73  | 5.77E-04    | 0.004898771 |
| Pden_4241 |              | drug resistance transporter, Bcr/CfIA subfamily                                  | 2.99  | 0.001409382 | 0.008444617 |
| Pden_4253 |              | ATP:cob(I)alamin adenosyltransferase                                             | -2.59 | 3.89E-04    | 0.003876944 |
| Pden_4255 |              | molecular chaperone, DnaK                                                        | 4.03  | 7.82E-05    | 0.001836392 |
| Pden_4257 | <i>xdhA</i>  | molybdopterin dehydrogenase, FAD-binding protein                                 | -2.80 | 8.87E-04    | 0.006300586 |
| Pden_4258 | <i>xdhB</i>  | xanthine dehydrogenase, molybdenum binding subunit apoprotein / Xanthine oxidase | -3.17 | 4.71E-04    | 0.004312253 |
| Pden_4259 | <i>xdhC</i>  | molybdenum cofactor sulfurylase                                                  | -2.82 | 1.36E-04    | 0.002288892 |
| Pden_4260 | <i>guaD</i>  | guanine deaminase                                                                | -2.83 | 5.08E-04    | 0.004507426 |
| Pden_4261 |              | acetone carboxylase, gamma subunit                                               | -7.27 | 3.86E-04    | 0.003865259 |
| Pden_4262 |              | acetone carboxylase, alpha subunit                                               | -7.83 | 4.57E-04    | 0.004269771 |
| Pden_4263 |              | acetone carboxylase, beta subunit                                                | -7.96 | 2.11E-04    | 0.002796602 |
| Pden_4273 | <i>tpa</i>   | aminotransferase                                                                 | -4.77 | 2.39E-04    | 0.002957052 |
| Pden_4274 |              | transcriptional regulator, GntR family                                           | -3.45 | 2.09E-04    | 0.00277756  |
| Pden_4276 |              | conserved hypothetical protein 698                                               | 1.91  | 0.001697942 | 0.009488612 |
| Pden_4289 |              | conserved hypothetical protein                                                   | 5.09  | 4.83E-05    | 0.0014723   |
| Pden_4290 |              | conserved hypothetical protein                                                   | 4.83  | 1.32E-04    | 0.002284717 |
| Pden_4291 | <i>dnaE2</i> | error-prone DNA polymerase, DnaE-like protein                                    | 3.52  | 5.62E-06    | 4.66E-04    |
| Pden_4295 |              | ATP-dependent DNA helicase, Rep family                                           | 1.33  | 3.45E-04    | 0.003644311 |
| Pden_4303 | <i>rpsD</i>  | SSU ribosomal protein S4P                                                        | 3.04  | 4.67E-04    | 0.00430718  |
| Pden_4312 |              | FAD linked oxidase domain protein                                                | 1.87  | 0.001148076 | 0.007373321 |
| Pden_4313 |              | GCN5-related N-acetyltransferase                                                 | 2.16  | 0.001639944 | 0.009279383 |
| Pden_4323 | <i>dprA</i>  | DNA protecting protein DprA                                                      | 2.35  | 1.24E-04    | 0.002256524 |
| Pden_4330 |              | phosphate ABC transporter substrate-binding protein, PhoT family                 | 1.62  | 2.24E-04    | 0.002864856 |
| Pden_4334 |              | amino acid/polyamine/organocation transporter, APC superfamily                   | -2.73 | 1.41E-04    | 0.002302411 |
| Pden_4338 |              | PE-PGRS family protein                                                           | -1.78 | 0.001008111 | 0.006805424 |
| Pden_4341 | <i>cysA</i>  | sulfate ABC transporter, ATPase subunit                                          | 2.70  | 6.39E-04    | 0.005142504 |
| Pden_4342 | <i>cysW</i>  | sulfate ABC transporter, inner membrane subunit CysW                             | 2.27  | 4.62E-04    | 0.004272675 |
| Pden_4347 |              | Radical SAM domain protein                                                       | -1.74 | 1.82E-04    | 0.002636701 |
| Pden_4352 |              | 5-oxoprolinase (ATP-hydrolyzing)                                                 | -1.73 | 1.86E-04    | 0.002661543 |
| Pden_4353 |              | 5-oxoprolinase (ATP-hydrolyzing)                                                 | -1.45 | 0.001162792 | 0.007442751 |
| Pden_4366 |              | DEAD/DEAH box helicase domain protein                                            | 2.98  | 1.59E-05    | 8.87E-04    |
| Pden_4368 |              | sodium:dicarboxylate symporter                                                   | -4.87 | 1.01E-04    | 0.00205033  |
| Pden_4373 |              | TonB-dependent siderophore receptor                                              | -2.23 | 6.05E-05    | 0.001630492 |
| Pden_4382 |              | TonB-dependent receptor                                                          | 2.17  | 3.49E-05    | 0.001297726 |
| Pden_4383 |              | periplasmic binding protein                                                      | 2.73  | 4.02E-05    | 0.001414323 |
| Pden_4384 |              | transport system permease protein                                                | 3.46  | 2.23E-04    | 0.002861702 |
| Pden_4385 |              | ABC transporter related protein                                                  | 3.62  | 7.65E-05    | 0.001836392 |
| Pden_4387 |              | carbohydrate ABC transporter substrate-binding protein, CUT1 family              | -2.90 | 4.41E-05    | 0.001441542 |
| Pden_4388 |              | conserved hypothetical protein                                                   | -1.53 | 3.23E-04    | 0.003558939 |
| Pden_4397 | <i>glcF</i>  | protein of unknown function DUF224, cysteine-rich region domain protein          | -1.94 | 3.50E-04    | 0.003644311 |
| Pden_4401 |              | Uncharacterized protein UPF0065                                                  | -4.38 | 3.27E-04    | 0.003573445 |
| Pden_4402 |              | protein of unknown function DUF112, transmembrane                                | -4.61 | 3.32E-04    | 0.003583012 |
| Pden_4403 |              | protein of unknown function DUF1468                                              | -4.92 | 2.01E-04    | 0.002747242 |
| Pden_4404 |              | Uncharacterized protein UPF0065                                                  | -5.72 | 2.51E-04    | 0.003045163 |
| Pden_4410 |              | transcriptional regulator, AraC family                                           | -1.52 | 3.47E-04    | 0.003644311 |
| Pden_4417 | <i>lepA</i>  | GTP-binding protein LepA                                                         | 1.40  | 2.82E-04    | 0.003316655 |
| Pden_4422 |              | alkylhydroperoxidase like protein, AhpD family                                   | 2.08  | 3.07E-04    | 0.003457321 |
| Pden_4427 | <i>glgC</i>  | glucose-1-phosphate adenyltransferase                                            | -1.53 | 3.96E-04    | 0.003908229 |
| Pden_4435 |              | aminodeoxychorismate synthase, subunit I                                         | 3.56  | 3.20E-04    | 0.003546894 |
| Pden_4441 |              | carbohydrate ABC transporter membrane protein 1, CUT1 family                     | 3.55  | 7.93E-04    | 0.005842821 |
| Pden_4442 |              | carbohydrate ABC transporter substrate-binding protein, CUT1 family              | 3.32  | 9.84E-04    | 0.006721522 |
| Pden_4447 |              | extracellular solute-binding protein, family 1                                   | -2.05 | 6.78E-04    | 0.005324    |
| Pden_4458 |              | RNA binding S1 domain protein                                                    | 1.78  | 1.94E-04    | 0.002717725 |
| Pden_4463 |              | Adenylosuccinate lyase                                                           | 1.43  | 8.07E-04    | 0.005905824 |
| Pden_4464 |              | flagellar motor switch protein FliG                                              | 3.10  | 5.59E-04    | 0.004802439 |
| Pden_4480 |              | acyl-CoA dehydrogenase domain protein                                            | -1.48 | 2.93E-04    | 0.003351226 |
| Pden_4491 | <i>murB</i>  | UDP-N-acetylmuramate dehydrogenase                                               | 2.10  | 5.96E-04    | 0.004981631 |
| Pden_4502 |              | ABC polyamine transporter, periplasmic substrate-binding protein                 | -1.90 | 9.55E-05    | 0.001988942 |
| Pden_4510 | <i>ubiB</i>  | 2-octaprenylphenol hydroxylase                                                   | 1.34  | 3.16E-04    | 0.00352866  |
| Pden_4511 | <i>ubiE</i>  | 2-octaprenyl-6-methoxy-1,4-benzoquinone methylase                                | 1.20  | 0.001078959 | 0.007094506 |
| Pden_4515 |              | 3-demethylubiquinone-9 3-methyltransferase                                       | -2.34 | 0.001002301 | 0.006795278 |
| Pden_4516 |              | 3-demethylubiquinone-9 3-methyltransferase                                       | -2.06 | 1.06E-04    | 0.002072833 |
| Pden_4519 |              | Activator of Hsp90 ATPase 1 family protein                                       | -2.23 | 6.99E-05    | 0.001761223 |
| Pden_4520 |              | Glyoxalase/bleomycin resistance protein/dioxygenase                              | -1.48 | 2.04E-04    | 0.002760804 |
| Pden_4522 |              | Glyoxalase/bleomycin resistance protein/dioxygenase                              | 1.19  | 0.001193501 | 0.007572298 |
| Pden_4526 |              | Methyltransferase type 11                                                        | 1.25  | 0.001236921 | 0.007741079 |
| Pden_4527 |              | transcriptional regulator, MarR family                                           | 1.54  | 3.55E-04    | 0.003665149 |
| Pden_4529 |              | Na <sup>+</sup> /solute symporter                                                | -2.51 | 3.73E-05    | 0.001329308 |
| Pden_4530 |              | ketopantoate reductase                                                           | -2.24 | 1.14E-04    | 0.002162073 |
| Pden_4531 |              | protein of unknown function DUF849                                               | -2.95 | 0.001798904 | 0.009814496 |



|           |             |                                                                         |       |             |             |
|-----------|-------------|-------------------------------------------------------------------------|-------|-------------|-------------|
| Pden_4543 |             | N-formylglutamate amidohydrolase                                        | -1.83 | 0.001814479 | 0.009878182 |
| Pden_4544 |             | Tripartite ATP-independent periplasmic transporter, DctQ component      | -2.45 | 0.001033384 | 0.006914571 |
| Pden_4545 |             | TRAP C4-dicarboxylate transport system permease DctM subunit            | -2.00 | 1.41E-04    | 0.002302411 |
| Pden_4547 |             | L-glutamine synthetase                                                  | -2.31 | 6.25E-04    | 0.005101822 |
| Pden_4550 | <i>acs</i>  | acetyl-coenzyme A synthetase                                            | -2.84 | 1.20E-05    | 7.68E-04    |
| Pden_4552 |             | Na <sup>+</sup> /solute symporter                                       | -4.38 | 1.31E-05    | 8.08E-04    |
| Pden_4553 |             | cyclic nucleotide-binding protein                                       | -4.12 | 1.60E-05    | 8.87E-04    |
| Pden_4566 |             | protein of unknown function DUF6, transmembrane                         | 2.31  | 2.51E-05    | 0.001123538 |
| Pden_4568 |             | hypothetical protein                                                    | 2.21  | 1.18E-04    | 0.002186091 |
| Pden_4569 |             | hypothetical protein                                                    | 2.48  | 9.25E-05    | 0.001988331 |
| Pden_4578 |             | Cupin 2, conserved barrel domain protein                                | 1.81  | 3.73E-04    | 0.003774183 |
| Pden_4591 |             | Rhodanese domain protein                                                | -1.68 | 1.31E-04    | 0.002284717 |
| Pden_4592 |             | uncharacterized peroxidase-related enzyme                               | -2.20 | 6.80E-04    | 0.005331091 |
| Pden_4603 |             | putative ABC transporter binding protein component                      | -3.12 | 2.36E-04    | 0.002938416 |
| Pden_4604 |             | transcriptional regulator, IclR family                                  | -1.32 | 0.001565968 | 0.009040019 |
| Pden_4606 |             | Radical SAM domain protein                                              | 3.89  | 4.39E-06    | 3.97E-04    |
| Pden_4607 |             | Uracil-DNA glycosylase superfamily                                      | 3.95  | 9.25E-06    | 6.69E-04    |
| Pden_4608 |             | putative general stress protein 26                                      | 1.65  | 2.42E-04    | 0.002976217 |
| Pden_4609 |             | phospholipase D/Transphosphatidylase                                    | 1.92  | 5.14E-04    | 0.004513649 |
| Pden_4616 | <i>hydA</i> | dihydropyrimidinase                                                     | -1.70 | 4.75E-04    | 0.004327427 |
| Pden_4625 |             | Glu/Leu/Phe/Val dehydrogenase, dimerization region                      | -2.84 | 1.96E-04    | 0.002717725 |
| Pden_4626 |             | protein of unknown function DUF161                                      | -3.08 | 1.76E-04    | 0.002605071 |
| Pden_4638 |             | hypothetical protein                                                    | 1.80  | 2.91E-04    | 0.003349127 |
| Pden_4641 |             | conserved hypothetical protein                                          | -2.38 | 0.001224623 | 0.007696203 |
| Pden_4642 |             | conserved hypothetical protein                                          | -2.24 | 1.15E-04    | 0.002162073 |
| Pden_4649 |             | extracellular solute-binding protein, family 1                          | -2.62 | 1.47E-05    | 8.86E-04    |
| Pden_4650 |             | binding-protein-dependent transport systems inner membrane component    | -2.32 | 3.49E-04    | 0.003644311 |
| Pden_4667 |             | amino acid ABC transporter substrate-binding protein, PAAT family       | -2.75 | 7.70E-04    | 0.005770981 |
| Pden_4670 |             | amino acid ABC transporter membrane protein 1, PAAT family              | -2.07 | 0.001508479 | 0.008849146 |
| Pden_4677 |             | 2OG-Fe(II) oxygenase                                                    | -1.50 | 9.66E-04    | 0.006681372 |
| Pden_4688 |             | YbaK/prolyl-tRNA synthetase associated region                           | 1.81  | 6.02E-04    | 0.005000875 |
| Pden_4689 |             | hypothetical protein                                                    | 1.51  | 0.001545068 | 0.008981262 |
| Pden_4691 | <i>pssA</i> | CDP-diaclyglycerol--serine O-phosphatidyltransferase                    | 1.09  | 0.001579159 | 0.009052351 |
| Pden_4692 | <i>psd</i>  | phosphatidylserine decarboxylase related protein                        | 1.72  | 0.001391469 | 0.008380808 |
| Pden_4693 |             | uracil-xanthine permease                                                | 2.69  | 2.62E-05    | 0.001142137 |
| Pden_4721 | <i>napA</i> | periplasmic nitrate reductase subunit NapA apoprotein                   | -2.07 | 6.91E-04    | 0.005364018 |
| Pden_4723 |             | periplasmic nitrate reductase subunit NapC                              | -2.36 | 4.47E-04    | 0.004200412 |
| Pden_4726 |             | MscS Mechanosensitive ion channel                                       | 2.91  | 1.79E-04    | 0.002619004 |
| Pden_4730 | <i>mauB</i> | methylamine dehydrogenase heavy chain                                   | -3.14 | 1.65E-04    | 0.002535748 |
| Pden_4751 |             | FAD dependent oxidoreductase                                            | -1.92 | 5.57E-05    | 0.001611959 |
| Pden_4752 |             | aldehyde dehydrogenase                                                  | -2.20 | 1.73E-04    | 0.0025947   |
| Pden_4753 |             | dihydrodipicolinate synthetase                                          | -2.52 | 1.72E-05    | 9.27E-04    |
| Pden_4754 |             | conserved hypothetical protein                                          | 1.97  | 3.49E-04    | 0.003644311 |
| Pden_4780 |             | phosphonate metabolism                                                  | -1.09 | 0.001256693 | 0.007826119 |
| Pden_4784 | <i>phnE</i> | phosphonate ABC transporter, inner membrane subunit                     | 2.29  | 4.15E-04    | 0.004014627 |
| Pden_4785 | <i>phnE</i> | phosphonate ABC transporter, inner membrane subunit                     | 3.79  | 0.001427143 | 0.008540929 |
| Pden_4786 | <i>phnD</i> | phosphonate ABC transporter, periplasmic phosphonate-binding protein    | 2.00  | 8.57E-04    | 0.006160708 |
| Pden_4793 |             | amino acid/amide ABC transporter ATP-binding protein 2, HAAT family     | -2.62 | 7.91E-05    | 0.001836392 |
| Pden_4794 |             | amino acid/amide ABC transporter ATP-binding protein 1, HAAT family     | -2.80 | 1.04E-04    | 0.002056763 |
| Pden_4795 |             | amino acid/amide ABC transporter membrane protein 2, HAAT family        | -3.31 | 3.64E-05    | 0.001320801 |
| Pden_4796 |             | amino acid/amide ABC transporter membrane protein 1, HAAT family        | -4.04 | 1.75E-04    | 0.002605071 |
| Pden_4797 |             | amino acid/amide ABC transporter substrate-binding protein, HAAT family | -4.74 | 9.27E-05    | 0.001988331 |
| Pden_4798 | <i>paaN</i> | phenylacetic acid degradation protein paaN                              | -1.94 | 2.33E-04    | 0.002932574 |
| Pden_4799 | <i>paaB</i> | Enoyl-CoA hydratase / short chain enoyl-CoA hydratase                   | -2.48 | 2.96E-04    | 0.003369347 |
| Pden_4801 | <i>paaF</i> | phenylacetate-CoA ligase                                                | -3.60 | 9.50E-05    | 0.001988942 |
| Pden_4806 | <i>paaK</i> | phenylacetate-CoA oxygenase/reductase, PaaK subunit                     | -1.52 | 0.001548283 | 0.008983446 |
| Pden_4807 | <i>paaJ</i> | phenylacetate-CoA oxygenase, PaaJ subunit                               | -1.88 | 3.38E-04    | 0.003618025 |
| Pden_4809 | <i>paaB</i> | phenylacetate-CoA oxygenase, PaaH subunit                               | -2.70 | 0.001523683 | 0.008897814 |
| Pden_4810 | <i>paaA</i> | phenylacetate-CoA oxygenase, PaaG subunit                               | -2.19 | 1.25E-04    | 0.002256524 |
| Pden_4813 |             | Penicillin amidase                                                      | -3.96 | 3.37E-05    | 0.001281971 |
| Pden_4814 |             | conserved hypothetical protein                                          | -2.51 | 7.44E-05    | 0.00180991  |
| Pden_4815 |             | conserved hypothetical protein                                          | -2.15 | 5.99E-05    | 0.001626459 |
| Pden_4816 |             | TRAP C4-dicarboxylate transport system permease DctM subunit            | -2.53 | 2.00E-04    | 0.002746744 |
| Pden_4817 |             | TRAP dicarboxylate transporter, DctP subunit                            | -4.07 | 7.12E-06    | 5.55E-04    |
| Pden_4818 |             | transcriptional regulator, IclR family                                  | -2.84 | 8.87E-04    | 0.006300586 |
| Pden_4819 |             | Thiolase                                                                | -2.92 | 9.95E-05    | 0.002048237 |
| Pden_4820 |             | AMP-dependent synthetase and ligase                                     | -2.34 | 5.09E-04    | 0.004509758 |
| Pden_4821 |             | conserved hypothetical protein                                          | -2.13 | 9.47E-04    | 0.006621591 |
| Pden_4822 |             | short-chain dehydrogenase/reductase SDR                                 | -2.32 | 0.001020549 | 0.006863897 |
| Pden_4829 |             | periplasmic binding protein                                             | 2.21  | 5.26E-04    | 0.004589558 |
| Pden_4830 |             | transport system permease protein                                       | 3.14  | 3.78E-04    | 0.003809005 |
| Pden_4859 | <i>hypF</i> | proline racemase                                                        | -1.60 | 0.001499962 | 0.008820336 |
| Pden_4861 |             | amino acid ABC transporter ATP-binding protein, PAAT family             | -1.20 | 0.00117731  | 0.007497765 |
| Pden_4862 |             | amino acid ABC transporter membrane protein 2, PAAT family              | -1.83 | 1.07E-04    | 0.002081794 |
| Pden_4863 |             | amino acid ABC transporter membrane protein 1, PAAT family              | -2.45 | 6.16E-04    | 0.005082021 |
| Pden_4864 |             | amino acid ABC transporter substrate-binding protein, PAAT family       | -1.95 | 5.77E-05    | 0.001613164 |
| Pden_4871 | <i>proC</i> | pyrroline-5-carboxylate reductase                                       | 2.62  | 0.001650719 | 0.00931727  |
| Pden_4872 |             | FAD linked oxidase domain protein                                       | 1.79  | 0.001298054 | 0.008020086 |
| Pden_4881 |             | Substrate-binding region of ABC-type glycine betaine transport system   | -2.21 | 5.86E-04    | 0.004954272 |
| Pden_4888 |             | Substrate-binding region of ABC-type glycine betaine transport system   | -1.69 | 8.01E-04    | 0.005884409 |
| Pden_4889 |             | Nitrilase/cyanide hydratase and apolipoprotein N-acyltransferase        | -1.12 | 0.001640341 | 0.009279383 |

|           |              |                                                                                                       |       |             |             |
|-----------|--------------|-------------------------------------------------------------------------------------------------------|-------|-------------|-------------|
| Pden_4911 |              | extracellular solute-binding protein                                                                  | -3.38 | 3.22E-04    | 0.003554006 |
| Pden_4941 |              | Betaine-aldehyde dehydrogenase                                                                        | -2.55 | 5.11E-05    | 0.001530504 |
| Pden_4942 |              | thiamine pyrophosphate enzyme domain protein TPP-binding protein                                      | -2.14 | 6.10E-05    | 0.001632877 |
| Pden_4943 |              | extracellular solute-binding protein, family 1                                                        | -3.53 | 2.41E-04    | 0.002970463 |
| Pden_4944 |              | ABC transporter related protein                                                                       | -3.47 | 5.23E-04    | 0.004572565 |
| Pden_4945 |              | binding-protein-dependent transport systems inner membrane component                                  | -2.44 | 6.14E-05    | 0.001635888 |
| Pden_4946 |              | binding-protein-dependent transport systems inner membrane component                                  | -2.28 | 2.41E-04    | 0.002970463 |
| Pden_4976 | <i>argE</i>  | acetylornithine deacetylase / acetylornithine deacetylase ArgE, Metallo peptidase. MEROPS family M20A | -1.67 | 0.001016066 | 0.006849989 |
| Pden_4992 |              | Enoyl-CoA hydratase/isomerase                                                                         | -2.21 | 5.22E-04    | 0.004571911 |
| Pden_4994 |              | amino acid/amide ABC transporter substrate-binding protein, HAAT family                               | -3.09 | 8.49E-05    | 0.001909873 |
| Pden_4996 |              | CoA-binding domain protein                                                                            | -3.35 | 4.40E-05    | 0.001441542 |
| Pden_4997 |              | amino acid/amide ABC transporter ATP-binding protein 2, HAAT family                                   | -4.69 | 1.62E-05    | 8.87E-04    |
| Pden_4998 |              | amino acid/amide ABC transporter ATP-binding protein 1, HAAT family                                   | -4.19 | 5.70E-05    | 0.001613164 |
| Pden_4999 |              | amino acid/amide ABC transporter membrane protein 2, HAAT family                                      | -4.38 | 1.49E-05    | 8.86E-04    |
| Pden_5000 |              | amino acid/amide ABC transporter membrane protein 1, HAAT family                                      | -4.02 | 4.36E-06    | 3.97E-04    |
| Pden_5002 |              | Rhodanese domain protein                                                                              | 1.16  | 0.001293446 | 0.008005764 |
| Pden_5004 | <i>ssuB2</i> | ABC transporter related protein                                                                       | 2.54  | 1.28E-04    | 0.002273372 |
| Pden_5005 |              | binding-protein-dependent transport systems inner membrane component                                  | 3.24  | 1.42E-04    | 0.002302984 |
| Pden_5006 |              | aliphatic sulfonates family ABC transporter, periplasmic ligand-binding protein                       | 3.15  | 1.26E-05    | 7.88E-04    |
| Pden_5007 |              | monooxygenase, NtaA/SnaA/SoxA family                                                                  | 3.67  | 7.26E-06    | 5.57E-04    |
| Pden_5010 |              | ABC transporter related protein                                                                       | 3.03  | 0.001172131 | 0.007483606 |
| Pden_5011 |              | binding-protein-dependent transport systems inner membrane component                                  | 2.47  | 9.52E-05    | 0.001988942 |
| Pden_5012 |              | ABC transporter substrate-binding protein                                                             | 3.22  | 2.97E-04    | 0.003369347 |
| Pden_5013 |              | Alkanesulfonate monooxygenase                                                                         | 3.24  | 3.70E-05    | 0.001328541 |
| Pden_5014 |              | Acyl-CoA dehydrogenase, type 2, C-terminal domain                                                     | 3.63  | 2.05E-04    | 0.002762396 |
| Pden_5016 |              | serine O-acetyltransferase                                                                            | 2.00  | 0.001256603 | 0.007826119 |
| Pden_5017 |              | conserved hypothetical protein                                                                        | 2.64  | 4.13E-05    | 0.001440375 |
| Pden_5021 |              | 3-oxoadipate CoA-transferase beta subunit                                                             | 1.66  | 7.28E-04    | 0.005551687 |
| Pden_5022 | <i>pcaF</i>  | 3-oxoadipyl-CoA thiolase                                                                              | 1.83  | 1.87E-04    | 0.002675066 |
| Pden_5023 |              | NAD-dependent epimerase/dehydratase                                                                   | 1.49  | 6.61E-04    | 0.005252026 |
| Pden_5024 |              | hypothetical protein                                                                                  | 2.39  | 9.53E-04    | 0.006658331 |
| Pden_5037 |              | ABC transporter related protein                                                                       | 1.77  | 9.83E-04    | 0.006721522 |
| Pden_5039 |              | ABC-2 type transporter                                                                                | 1.78  | 0.001230242 | 0.007708806 |
| Pden_5041 |              | hypothetical protein                                                                                  | 1.65  | 4.77E-04    | 0.004336923 |
| Pden_5044 |              | aldo/keto reductase                                                                                   | -1.04 | 0.001733671 | 0.009603475 |
| Pden_5048 |              | ABC transporter related protein                                                                       | -2.17 | 5.56E-04    | 0.004791174 |
| Pden_5049 |              | binding-protein-dependent transport systems inner membrane component                                  | -1.55 | 7.91E-04    | 0.005842821 |
| Pden_5050 |              | binding-protein-dependent transport systems inner membrane component                                  | -1.59 | 2.50E-04    | 0.003045163 |
| Pden_5051 |              | polysaccharide deacetylase                                                                            | -1.63 | 2.35E-04    | 0.002938416 |
| Pden_5081 |              | amino acid ABC transporter substrate-binding protein, PAAT family                                     | -2.16 | 2.06E-04    | 0.002762396 |
| Pden_5101 |              | conserved hypothetical protein                                                                        | 2.79  | 9.02E-06    | 6.62E-04    |
| Pden_5117 |              | protein of unknown function DUF1234                                                                   | 3.11  | 5.12E-04    | 0.004509969 |
| Pden_5118 |              | conserved hypothetical protein                                                                        | 3.11  | 1.45E-04    | 0.00231305  |
| Pden_5119 |              | NADPH-dependent FMN reductase                                                                         | 2.42  | 5.07E-05    | 0.001528498 |
| Pden_5120 |              | hypothetical protein                                                                                  | 3.26  | 1.83E-05    | 9.57E-04    |
| Pden_5121 |              | hypothetical protein                                                                                  | 3.37  | 1.91E-05    | 9.76E-04    |
| Pden_5124 |              | hypothetical protein                                                                                  | 3.38  | 5.66E-04    | 0.004855209 |
| Pden_5125 |              | putative monooxygenase protein                                                                        | 4.63  | 2.41E-06    | 2.65E-04    |
| Pden_5126 |              | binding-protein-dependent transport systems inner membrane component                                  | 5.15  | 3.31E-05    | 0.001270903 |
| Pden_5127 |              | transcriptional regulator, Fis family                                                                 | 4.70  | 2.75E-05    | 0.001152121 |
| Pden_5128 |              | ABC transporter related protein                                                                       | 4.35  | 1.47E-04    | 0.002325272 |
| Pden_5132 |              | efflux transporter, RND family, MFP subunit                                                           | 2.63  | 7.13E-04    | 0.005462944 |
| Pden_5133 | <i>macB3</i> | ABC transporter related protein                                                                       | 2.79  | 0.001659813 | 0.009345864 |

Table S4. Lists of differentially expressed genes between *ΔrecA* with MMC vs. *ΔrecA* without MMC.

| gene_id   | name              | annotation                                                              | PhiSpy_phage_region | logFC | PValue      | FDR         |
|-----------|-------------------|-------------------------------------------------------------------------|---------------------|-------|-------------|-------------|
| Pden_0003 | <i>mmE (trmE)</i> | tRNA modification GTPase trmE                                           |                     | 2.32  | 3.05E-05    | 7.09E-04    |
| Pden_0010 | <i>rph</i>        | RNase PH                                                                |                     | 1.29  | 6.49E-04    | 0.003220189 |
| Pden_0011 | <i>rdgB</i>       | dITPase                                                                 |                     | 1.94  | 0.001666094 | 0.00593209  |
| Pden_0012 |                   | Endoribonuclease L-PSP                                                  |                     | 1.92  | 1.45E-04    | 0.001413281 |
| Pden_0013 |                   | putative oxygen-independent coproporphyrinogen III oxidase              |                     | 2.00  | 8.13E-05    | 0.00102897  |
| Pden_0017 | <i>clpP</i>       | ATP-dependent Clp protease proteolytic subunit ClpP                     |                     | -1.75 | 0.0024824   | 0.007287348 |
| Pden_0018 |                   | GCN5-related N-acetyltransferase                                        |                     | -1.72 | 7.95E-04    | 0.003649359 |
| Pden_0019 | <i>fghA</i>       | Carboxylesterase                                                        |                     | -1.95 | 0.001383444 | 0.005219358 |
| Pden_0020 |                   | Pyrolo-quinoline quinone                                                |                     | -4.03 | 7.15E-04    | 0.00340186  |
| Pden_0021 |                   | hypothetical protein                                                    |                     | -3.02 | 1.51E-04    | 0.001447668 |
| Pden_0022 |                   | amino acid ABC transporter substrate-binding protein, PAAT family       |                     | -2.53 | 4.84E-04    | 0.002708578 |
| Pden_0024 |                   | conserved hypothetical protein                                          |                     | -2.98 | 1.12E-05    | 6.87E-04    |
| Pden_0026 |                   | amino acid/amide ABC transporter substrate-binding protein, HAAT family |                     | -4.03 | 3.19E-05    | 7.09E-04    |
| Pden_0027 |                   | 40-residue YVTN family beta-propeller repeat protein                    |                     | -4.16 | 1.81E-05    | 6.87E-04    |
| Pden_0028 |                   | hypothetical protein                                                    |                     | -4.70 | 2.55E-04    | 0.001883264 |
| Pden_0029 |                   | ABC transporter related protein                                         |                     | -3.66 | 6.06E-05    | 9.28E-04    |
| Pden_0030 |                   | ABC-2 type transporter                                                  |                     | -2.98 | 9.77E-05    | 0.001134352 |
| Pden_0031 |                   | conserved hypothetical protein                                          |                     | -1.38 | 0.001295901 | 0.004974334 |
| Pden_0042 | <i>thiD</i>       | hydroxymethylpyrimidine kinase / phosphomethylpyrimidine kinase         |                     | 2.69  | 3.78E-04    | 0.002311838 |
| Pden_0046 |                   | two component transcriptional regulator, winged helix family            |                     | -2.09 | 3.12E-05    | 7.09E-04    |
| Pden_0047 |                   | PAS/PAC sensor hybrid histidine kinase                                  |                     | -2.55 | 1.06E-05    | 6.87E-04    |
| Pden_0048 |                   | AMP-dependent synthetase and ligase                                     |                     | -4.73 | 5.05E-05    | 9.00E-04    |
| Pden_0049 |                   | amino acid/amide ABC transporter ATP-binding protein 1, HAAT family     |                     | -4.65 | 4.73E-06    | 6.87E-04    |
| Pden_0050 |                   | amino acid/amide ABC transporter membrane protein 1, HAAT family        |                     | -4.10 | 5.20E-05    | 9.01E-04    |
| Pden_0051 |                   | amino acid/amide ABC transporter membrane protein 2, HAAT family        |                     | -4.11 | 1.98E-04    | 0.001639291 |
| Pden_0052 |                   | amino acid/amide ABC transporter substrate-binding protein, HAAT family |                     | -5.27 | 7.51E-06    | 6.87E-04    |
| Pden_0053 |                   | amino acid/amide ABC transporter ATP-binding protein 2, HAAT family     |                     | -5.03 | 5.22E-06    | 6.87E-04    |
| Pden_0054 |                   | phenylacetate-CoA ligase, putative                                      |                     | -3.61 | 1.61E-05    | 6.87E-04    |
| Pden_0056 |                   | N-formylglutamate amidohydrolase                                        |                     | -1.10 | 0.001287242 | 0.004956126 |
| Pden_0057 |                   | SPFH domain, Band 7 family protein                                      |                     | -1.66 | 9.08E-04    | 0.00396488  |
| Pden_0067 | <i>tnpB</i>       | IS66 Orf2 family protein                                                |                     | 6.11  | 2.25E-05    | 6.88E-04    |
| Pden_0068 |                   | transposase IS66                                                        |                     | 4.22  | 5.36E-06    | 6.87E-04    |
| Pden_0072 |                   | CHAD domain containing protein                                          |                     | 1.88  | 1.14E-04    | 0.001205609 |
| Pden_0074 |                   | adenylate cyclase                                                       |                     | 1.16  | 0.002547446 | 0.007991152 |
| Pden_0077 |                   | transposase                                                             |                     | 2.74  | 3.81E-05    | 7.91E-04    |
| Pden_0084 |                   | hypothetical protein                                                    |                     | 2.98  | 0.002334265 | 0.007479989 |
| Pden_0085 |                   | hypothetical protein                                                    |                     | 3.05  | 0.001176029 | 0.004659024 |
| Pden_0087 | <i>pseF</i>       | acylneuraminate cytidyltransferase                                      |                     | 1.44  | 0.001049593 | 0.004359385 |
| Pden_0088 |                   | flagellin modification protein FlmD                                     |                     | 1.57  | 3.91E-04    | 0.002370473 |
| Pden_0097 |                   | hypothetical protein                                                    |                     | -2.00 | 1.62E-04    | 0.001494676 |
| Pden_0098 |                   | Conjugal transfer TraD family protein                                   |                     | -3.07 | 3.11E-05    | 7.09E-04    |
| Pden_0099 |                   | conserved hypothetical protein                                          |                     | -2.57 | 2.69E-05    | 7.01E-04    |
| Pden_0100 | <i>traA</i>       | plasmid mobilization system relaxase                                    |                     | 1.53  | 0.002473962 | 0.007804156 |
| Pden_0108 |                   | aldo/keto reductase                                                     |                     | 2.05  | 0.001435982 | 0.005357684 |
| Pden_0116 | <i>catB</i>       | transferase hexapeptide repeat containing protein                       |                     | 1.94  | 1.52E-04    | 0.001450721 |
| Pden_0117 |                   | hypothetical protein                                                    |                     | -1.10 | 0.002680201 | 0.008264226 |
| Pden_0120 |                   | DNA methylase N-4/N-6 domain protein                                    |                     | 3.30  | 2.94E-04    | 0.002042562 |
| Pden_0126 |                   | hypothetical protein                                                    |                     | 3.94  | 1.17E-05    | 6.87E-04    |
| Pden_0127 |                   | conserved hypothetical protein                                          |                     | 4.11  | 3.51E-04    | 0.002253976 |
| Pden_0128 |                   | hypothetical protein                                                    |                     | 1.86  | 4.66E-04    | 0.002638816 |
| Pden_0130 |                   | transcriptional regulator, XRE family                                   |                     | 1.12  | 0.00217453  | 0.00714912  |
| Pden_0131 |                   | hypothetical protein                                                    |                     | 5.03  | 7.26E-06    | 6.87E-04    |
| Pden_0132 |                   | putative replication protein A                                          |                     | 3.62  | 2.63E-05    | 7.00E-04    |
| Pden_0133 |                   | conserved hypothetical protein                                          |                     | 2.95  | 2.00E-05    | 6.87E-04    |
| Pden_0134 |                   | transposase IS116/IS110/IS902 family protein                            |                     | -1.94 | 5.50E-05    | 9.01E-04    |
| Pden_0136 |                   | protein of unknown function DUF736                                      |                     | -1.23 | 0.0020275   | 0.006816224 |
| Pden_0138 |                   | hypothetical protein                                                    |                     | -1.51 | 3.31E-04    | 0.002212274 |
| Pden_0157 |                   | transcriptional regulator, LysR family                                  |                     | -1.99 | 7.42E-04    | 0.003490386 |
| Pden_0160 |                   | acriflavin resistance protein                                           |                     | 2.37  | 1.89E-05    | 6.87E-04    |
| Pden_0171 |                   | monooxygenase, FAD-binding protein                                      |                     | -2.60 | 0.001413867 | 0.005302526 |
| Pden_0172 |                   | benzoate-CoA ligase family                                              |                     | -2.95 | 3.18E-04    | 0.002153186 |
| Pden_0173 |                   | fumarylacetoacetate (FAA) hydrolase                                     |                     | -3.33 | 0.001590682 | 0.005776426 |
| Pden_0174 | <i>maiA</i>       | maleylacetoacetate isomerase                                            |                     | -2.89 | 3.99E-04    | 0.002394246 |
| Pden_0175 |                   | amino acid/amide ABC transporter substrate-binding protein, HAAT family |                     | -4.26 | 0.001322502 | 0.00504584  |
| Pden_0176 |                   | amino acid/amide ABC transporter membrane protein 1, HAAT family        |                     | -2.03 | 0.003114475 | 0.009239266 |
| Pden_0177 |                   | amino acid/amide ABC transporter membrane protein 2, HAAT family        |                     | -2.18 | 0.002603158 | 0.00810067  |
| Pden_0179 |                   | amino acid/amide ABC transporter ATP-binding protein 2, HAAT family     |                     | -2.15 | 0.001280585 | 0.004941769 |
| Pden_0180 |                   | aldehyde dehydrogenase                                                  |                     | -3.38 | 7.30E-05    | 9.81E-04    |
| Pden_0181 |                   | glucose-methanol-choline oxidoreductase                                 |                     | -3.46 | 3.43E-04    | 0.002238614 |
| Pden_0182 |                   | RNase Z                                                                 |                     | -2.31 | 0.001187224 | 0.004688702 |
| Pden_0187 |                   | transcriptional regulator, MarR family                                  |                     | -2.83 | 1.06E-05    | 6.87E-04    |
| Pden_0188 |                   | regulatory protein, IclR                                                |                     | -1.57 | 0.002344826 | 0.007499592 |
| Pden_0189 |                   | TRAP C4-dicarboxylate transport system permease DctM subunit            |                     | -2.58 | 1.82E-04    | 0.001544858 |
| Pden_0190 |                   | Tripartite ATP-independent periplasmic transporter, DctQ component      |                     | -3.65 | 7.96E-05    | 0.001019694 |
| Pden_0192 |                   | short-chain dehydrogenase/reductase SDR                                 |                     | -3.36 | 6.76E-05    | 9.57E-04    |
| Pden_0193 |                   | TRAP dicarboxylate transporter- DctP subunit                            |                     | -3.73 | 0.001233407 | 0.004829652 |
| Pden_0194 |                   | conserved hypothetical protein                                          |                     | -1.46 | 0.001001808 | 0.004219763 |
| Pden_0195 |                   | L-carnitine dehydratase/bile acid-inducible protein F                   |                     | -2.02 | 6.81E-04    | 0.003308863 |
| Pden_0196 |                   | short-chain dehydrogenase/reductase SDR                                 |                     | -1.83 | 8.46E-04    | 0.003801247 |
| Pden_0201 |                   | 3-hydroxyacyl-CoA dehydrogenase                                         |                     | 2.57  | 0.001993578 | 0.006751497 |
| Pden_0203 |                   | luciferase family protein                                               |                     | -3.15 | 6.59E-06    | 6.87E-04    |
| Pden_0204 | <i>nbbB</i>       | 3,4-dihydroxy-2-butanone 4-phosphate synthase                           |                     | -1.81 | 0.002977608 | 0.008946962 |
| Pden_0205 |                   | hypothetical protein                                                    |                     | -2.48 | 0.001354214 | 0.00513587  |
| Pden_0206 |                   | short-chain dehydrogenase/reductase SDR                                 |                     | -4.03 | 1.81E-05    | 6.87E-04    |
| Pden_0207 |                   | alpha/beta hydrolase fold protein                                       |                     | -1.57 | 0.00253914  | 0.007979929 |



|           |             |                                                                                                  |       |             |             |             |
|-----------|-------------|--------------------------------------------------------------------------------------------------|-------|-------------|-------------|-------------|
| Pden_0211 |             | transcriptional regulator, MerR family                                                           | -1.32 | 0.001075397 | 0.004419427 |             |
| Pden_0218 |             | transcriptional regulator, LysR family                                                           | -1.72 | 1.96E-04    | 0.001631407 |             |
| Pden_0219 |             | hypothetical protein                                                                             | -1.27 | 0.001082511 | 0.004432197 |             |
| Pden_0220 |             | luciferase family protein                                                                        | -2.56 | 5.51E-05    | 9.01E-04    |             |
| Pden_0221 |             | conserved hypothetical protein                                                                   | -1.41 | 3.58E-04    | 0.002285725 |             |
| Pden_0224 |             | sigma54 specific transcriptional regulator, Fis family                                           | -2.94 | 3.37E-05    | 7.29E-04    |             |
| Pden_0233 |             | membrane protein-like protein                                                                    | 1.69  | 1.92E-04    | 0.001609815 |             |
| Pden_0234 |             | hypothetical protein                                                                             | 1.85  | 0.001449441 | 0.005395971 |             |
| Pden_0235 |             | oligopeptide/dipeptide ABC transporter, ATPase subunit                                           | -2.25 | 1.13E-04    | 0.001195179 |             |
| Pden_0236 |             | oligopeptide/dipeptide ABC transporter, ATPase subunit                                           | -2.34 | 5.15E-05    | 9.01E-04    |             |
| Pden_0237 |             | binding-protein-dependent transport systems inner membrane component                             | -3.18 | 3.62E-04    | 0.002298137 |             |
| Pden_0238 |             | binding-protein-dependent transport systems inner membrane component                             | -3.57 | 1.19E-04    | 0.001240013 |             |
| Pden_0239 |             | extracellular solute-binding protein, family 5                                                   | -3.45 | 3.10E-04    | 0.002120136 |             |
| Pden_0242 |             | iron-containing alcohol dehydrogenase                                                            | -2.72 | 6.31E-05    | 9.35E-04    |             |
| Pden_0243 |             | succinate semialdehyde dehydrogenase                                                             | -2.09 | 0.001035715 | 0.004326587 |             |
| Pden_0244 |             | Mandelate racemase/muconate lactonizing enzyme, C-terminal domain protein                        | -2.18 | 1.85E-04    | 0.001572457 |             |
| Pden_0245 |             | 5-carboxymethyl-2-hydroxyruconate delta-isomerase                                                | -1.88 | 3.92E-04    | 0.002370473 |             |
| Pden_0248 |             | monosaccharide ABC transporter ATP-binding protein, CUT2 family                                  | 1.26  | 0.002386871 | 0.00759091  |             |
| Pden_0255 |             | hypothetical protein                                                                             | -3.17 | 2.78E-04    | 0.001990943 |             |
| Pden_0270 |             | gene transfer agent (GTA) like protein                                                           | 1.84  | 9.92E-05    | 0.001137092 |             |
| Pden_0279 |             | transcriptional regulator, GntR family                                                           | -1.71 | 0.001470674 | 0.005462966 |             |
| Pden_0280 | <i>ehuA</i> | hydroxyectoine ABC transporter ATP-binding protein / ectoine ABC transporter ATP-binding protein | -4.07 | 4.65E-04    | 0.002634998 |             |
| Pden_0281 | <i>ehuB</i> | hydroxyectoine-binding protein / ectoine-binding protein                                         | -4.32 | 4.92E-05    | 8.92E-04    |             |
| Pden_0282 | <i>ehuC</i> | hydroxyectoine ABC transporter membrane protein / ectoine ABC transporter membrane protein       | -4.17 | 5.54E-05    | 9.01E-04    |             |
| Pden_0283 | <i>ehuD</i> | hydroxyectoine ABC transporter membrane protein / ectoine ABC transporter membrane protein       | -3.25 | 1.67E-04    | 0.001505274 |             |
| Pden_0284 |             | Asp/Glu racemase                                                                                 | -2.73 | 5.45E-04    | 0.002899708 |             |
| Pden_0285 | <i>eutB</i> | Pyridoxal-5'-phosphate-dependent enzyme, beta subunit                                            | -2.79 | 2.09E-04    | 0.001676926 |             |
| Pden_0286 |             | Ornithine cyclodeaminase                                                                         | -3.08 | 4.35E-04    | 0.002539593 |             |
| Pden_0287 | <i>doeA</i> | peptidase M24                                                                                    | -3.34 | 2.63E-04    | 0.00192913  |             |
| Pden_0288 | <i>doeB</i> | Succinylglutamate desuccinylase/aspartoacylase                                                   | -2.66 | 0.002072324 | 0.006920961 |             |
| Pden_0289 |             | succinate semialdehyde dehydrogenase                                                             | -2.95 | 5.93E-04    | 0.003059768 |             |
| Pden_0290 |             | aminotransferase                                                                                 | -3.40 | 8.77E-05    | 0.001067537 |             |
| Pden_0291 |             | Alcohol dehydrogenase, zinc-binding domain protein                                               | -2.40 | 0.001081179 | 0.004432197 |             |
| Pden_0293 |             | hypothetical protein                                                                             | 2.01  | 0.003371994 | 0.009800462 |             |
| Pden_0294 |             | Hemolysin-type calcium-binding region                                                            | 1.43  | 5.69E-04    | 0.002981835 |             |
| Pden_0296 |             | TonB-dependent receptor                                                                          | -1.24 | 0.002057742 | 0.006885889 |             |
| Pden_0300 |             | periplasmic binding protein                                                                      | -1.36 | 7.21E-04    | 0.00341488  |             |
| Pden_0304 |             | transcriptional regulator, LysR family                                                           | 2.98  | 6.87E-04    | 0.00331005  |             |
| Pden_0310 |             | two component transcriptional regulator, winged helix family                                     | -1.55 | 0.001024247 | 0.00429285  |             |
| Pden_0318 |             | transcriptional regulator, GntR family                                                           | -1.38 | 0.001033855 | 0.004323912 |             |
| Pden_0319 |             | conserved hypothetical protein                                                                   | -2.65 | 2.81E-04    | 0.002001287 |             |
| Pden_0326 |             | luciferase family protein                                                                        | -1.66 | 0.00110441  | 0.004476884 |             |
| Pden_0342 |             | DNA polymerase III beta subunit family protein                                                   | 1.95  | 0.001117084 | 0.004513404 |             |
| Pden_0344 |             | hypothetical protein                                                                             | -2.69 | 1.56E-05    | 6.87E-04    |             |
| Pden_0345 |             | hypothetical protein                                                                             | -1.08 | 0.002912148 | 0.008790037 |             |
| Pden_0347 |             | hypothetical protein                                                                             | -4.15 | 0.003327307 | 0.009722909 |             |
| Pden_0357 |             | hypothetical protein                                                                             | 2.47  | 0.001056745 | 0.004364031 |             |
| Pden_0358 |             | Resolvase helix-turn-helix domain protein                                                        | 1     | 4.07        | 6.58E-06    | 6.87E-04    |
| Pden_0359 |             | phage Terminase                                                                                  | 1     | 4.01        | 1.32E-05    | 6.87E-04    |
| Pden_0360 |             | phage portal protein, HK97 family                                                                | 1     | 3.49        | 1.19E-05    | 6.87E-04    |
| Pden_0361 |             | peptidase S14, ClpP                                                                              | 1     | 2.35        | 1.68E-04    | 0.001505274 |
| Pden_0362 |             | phage major capsid protein, HK97 family                                                          | 1     | 1.86        | 3.71E-04    | 0.002309828 |
| Pden_0364 |             | hypothetical protein                                                                             | 1     | 1.75        | 0.002132275 | 0.00705609  |
| Pden_0365 |             | hypothetical protein                                                                             | 1     | 2.23        | 0.001053999 | 0.004364031 |
| Pden_0368 |             | hypothetical protein                                                                             | 1     | -5.23       | 0.002212077 | 0.007225642 |
| Pden_0376 |             | hypothetical protein                                                                             | 1     | 2.08        | 4.93E-04    | 0.002738506 |
| Pden_0377 |             | hypothetical protein                                                                             | 1     | 2.16        | 4.53E-04    | 0.002599236 |
| Pden_0380 |             | hypothetical protein                                                                             | 1     | 2.28        | 5.87E-04    | 0.003045698 |
| Pden_0387 |             | hypothetical protein                                                                             | -1.04 | 0.001659001 | 0.005923996 |             |
| Pden_0391 |             | hypothetical protein                                                                             | -1.86 | 0.002038343 | 0.006848131 |             |
| Pden_0393 |             | hypothetical protein                                                                             | -3.56 | 7.42E-05    | 9.87E-04    |             |
| Pden_0396 | <i>mtaB</i> | MiaB-like tRNA modifying enzyme                                                                  | 1.04  | 0.002946992 | 0.008870761 |             |
| Pden_0400 | <i>dxs</i>  | 1-deoxy-D-xylulose-5-phosphate synthase                                                          | 1.26  | 0.002002197 | 0.006771624 |             |
| Pden_0404 | <i>amn</i>  | AMP nucleosidase                                                                                 | -2.11 | 5.52E-05    | 9.01E-04    |             |
| Pden_0417 |             | protein of unknown function DUF1491                                                              | 1.37  | 3.77E-04    | 0.002311838 |             |
| Pden_0425 |             | Electron-transferring-flavoprotein dehydrogenase                                                 | -1.42 | 3.54E-04    | 0.002264122 |             |
| Pden_0439 |             | hypothetical protein                                                                             | -1.40 | 0.001522886 | 0.00560347  |             |
| Pden_0440 | <i>leuB</i> | 3-isopropylmalate dehydrogenase                                                                  | -1.29 | 0.002968734 | 0.008925594 |             |
| Pden_0444 |             | conserved hypothetical protein                                                                   | -1.80 | 0.002811521 | 0.008560656 |             |
| Pden_0446 |             | zinc finger, CHC2-family protein                                                                 | -2.59 | 0.002284619 | 0.007362843 |             |
| Pden_0447 |             | hypothetical protein                                                                             | -3.05 | 2.71E-04    | 0.001969565 |             |
| Pden_0448 |             | conserved hypothetical protein                                                                   | -3.55 | 0.001235838 | 0.004835431 |             |
| Pden_0449 |             | Exonuclease, RNase T and DNA polymerase III                                                      | -3.61 | 0.001132008 | 0.004557929 |             |
| Pden_0450 |             | conserved hypothetical protein                                                                   | -1.08 | 0.002201684 | 0.007205642 |             |
| Pden_0461 | <i>istA</i> | Integrase, catalytic region                                                                      | -2.50 | 2.88E-05    | 7.03E-04    |             |
| Pden_0462 |             | IstB domain protein ATP-binding protein                                                          | -2.73 | 1.13E-05    | 6.87E-04    |             |
| Pden_0463 |             | Recombinase                                                                                      | -1.47 | 0.001227351 | 0.004813383 |             |
| Pden_0464 |             | transposase IS116/IS110/IS902 family protein                                                     | -2.32 | 6.37E-05    | 9.35E-04    |             |
| Pden_0467 |             | putative spermidine/putrescine-binding protein                                                   | -4.37 | 0.001568718 | 0.005718083 |             |
| Pden_0468 |             | binding-protein-dependent transport systems inner membrane component                             | -4.50 | 3.43E-04    | 0.002238614 |             |
| Pden_0469 |             | binding-protein-dependent transport systems inner membrane component                             | -3.90 | 0.001607477 | 0.005813326 |             |
| Pden_0471 |             | protein of unknown function DUF849                                                               | -3.12 | 0.001837734 | 0.006359843 |             |
| Pden_0472 |             | 5-oxoprolinase (ATP-hydrolyzing)                                                                 | -3.37 | 8.29E-06    | 6.87E-04    |             |
| Pden_0473 |             | Hydantoinase B/oxoprolinase                                                                      | -3.53 | 6.26E-06    | 6.87E-04    |             |
| Pden_0474 |             | short-chain dehydrogenase/reductase SDR                                                          | -3.28 | 4.94E-06    | 6.87E-04    |             |
| Pden_0475 |             | hypothetical protein                                                                             | -2.99 | 2.93E-05    | 7.06E-04    |             |
| Pden_0476 |             | thioesterase superfamily protein                                                                 | -2.72 | 1.20E-04    | 0.00124867  |             |

|           |             |                                                                      |       |             |             |
|-----------|-------------|----------------------------------------------------------------------|-------|-------------|-------------|
| Pden_0477 |             | transcriptional regulator, XRE family                                | -2.08 | 0.001814883 | 0.006297979 |
| Pden_0494 |             | NUDX hydrolase                                                       | 3.78  | 8.64E-04    | 0.003825889 |
| Pden_0495 |             | response regulator receiver protein                                  | 2.26  | 8.00E-05    | 0.001019694 |
| Pden_0507 |             | chaperone DnaJ domain protein                                        | -1.10 | 0.001610262 | 0.005813604 |
| Pden_0514 |             | Sarcosine oxidase, delta subunit, heterotetrameric                   | -1.30 | 6.63E-04    | 0.003258025 |
| Pden_0515 |             | sarcosine oxidase, alpha subunit family                              | -1.32 | 0.001578469 | 0.005745354 |
| Pden_0524 |             | purine nucleotide phosphorylase                                      | -2.65 | 1.35E-04    | 0.001332887 |
| Pden_0525 |             | nucleoside ABC transporter membrane protein                          | -2.79 | 4.41E-05    | 8.44E-04    |
| Pden_0526 |             | nucleoside ABC transporter membrane protein                          | -2.56 | 5.56E-04    | 0.002936497 |
| Pden_0527 |             | nucleoside ABC transporter ATP-binding protein                       | -2.83 | 2.18E-04    | 0.001704793 |
| Pden_0528 |             | nucleoside-binding protein                                           | -3.89 | 6.56E-06    | 6.87E-04    |
| Pden_0540 | <i>glyS</i> | glycyl-tRNA synthetase beta chain                                    | 1.19  | 0.001770983 | 0.006171016 |
| Pden_0543 |             | dihydroneopterin aldolase                                            | 1.19  | 0.001294413 | 0.004972392 |
| Pden_0548 |             | ATPase associated with various cellular activities, AAA_5            | -1.24 | 8.28E-04    | 0.003758457 |
| Pden_0551 | <i>lpdA</i> | dihydrolipoamide dehydrogenase                                       | -1.40 | 6.24E-04    | 0.003147257 |
| Pden_0554 | <i>odhB</i> | 2-oxoglutarate dehydrogenase E2 component                            | -1.04 | 0.001915719 | 0.006553571 |
| Pden_0560 |             | Hemolysin-type calcium-binding region                                | -1.46 | 5.73E-04    | 0.002995825 |
| Pden_0564 |             | NnrUfamily protein                                                   | -1.20 | 8.60E-04    | 0.003825716 |
| Pden_0565 |             | conserved hypothetical protein                                       | -1.66 | 1.95E-04    | 0.001628537 |
| Pden_0566 |             | L-erythro-3-methylmaly-CoA dehydratase                               | -1.43 | 2.24E-04    | 0.00171547  |
| Pden_0570 |             | conserved hypothetical protein                                       | -1.38 | 0.001089632 | 0.004446969 |
| Pden_0574 |             | beta-lactamase domain protein                                        | -3.16 | 2.11E-04    | 0.001679183 |
| Pden_0579 | <i>rimJ</i> | protein of unknown function DUF519                                   | 1.92  | 9.62E-05    | 0.001121864 |
| Pden_0590 |             | membrane protein involved in aromatic hydrocarbon degradation        | -4.42 | 6.02E-04    | 0.003082284 |
| Pden_0592 | <i>guaB</i> | inosine-5'-monophosphate dehydrogenase                               | 1.10  | 0.002044273 | 0.006863498 |
| Pden_0593 |             | hypothetical protein                                                 | 2.91  | 8.83E-06    | 6.87E-04    |
| Pden_0594 |             | Fmu (Sun) domain protein                                             | 1.93  | 0.003106892 | 0.009239266 |
| Pden_0595 |             | multi-sensor hybrid histidine kinase                                 | 3.11  | 4.61E-04    | 0.002628348 |
| Pden_0596 |             | conserved hypothetical protein                                       | 1.23  | 0.001639218 | 0.005877734 |
| Pden_0600 |             | putative glutamine amidotransferase                                  | -1.82 | 1.31E-04    | 0.001314735 |
| Pden_0601 |             | hypothetical protein                                                 | 3.04  | 3.72E-04    | 0.002309828 |
| Pden_0605 |             | thiamine diphosphokinase                                             | 1.40  | 5.75E-04    | 0.003000752 |
| Pden_0606 |             | binding-protein-dependent transport systems inner membrane component | -3.40 | 2.15E-04    | 0.001694513 |
| Pden_0607 |             | binding-protein-dependent transport systems inner membrane component | -3.66 | 7.78E-05    | 0.001009788 |
| Pden_0608 |             | extracellular solute-binding protein, family 5                       | -3.64 | 2.00E-05    | 6.87E-04    |
| Pden_0609 |             | ABC transporter related protein                                      | -2.67 | 5.31E-05    | 9.01E-04    |
| Pden_0610 |             | amidohydrolase                                                       | -2.69 | 2.34E-05    | 6.88E-04    |
| Pden_0611 | <i>lpdA</i> | dihydrolipoamide dehydrogenase                                       | -2.84 | 8.35E-05    | 0.001043896 |
| Pden_0612 |             | protein of unknown function DUF924                                   | -1.68 | 2.85E-04    | 0.002013301 |
| Pden_0615 |             | putative bacterioferritin-associated ferredoxin                      | -2.60 | 0.003429049 | 0.009903205 |
| Pden_0628 |             | hypothetical protein                                                 | 1.59  | 1.49E-04    | 0.001433489 |
| Pden_0630 |             | aromatic amino acid aminotransferase apoenzyme                       | -1.79 | 8.55E-05    | 0.001060694 |
| Pden_0632 | <i>smpB</i> | SsrA-binding protein                                                 | 1.84  | 6.77E-05    | 9.57E-04    |
| Pden_0633 |             | thiamine pyrophosphate enzyme TPP binding domain protein             | -2.13 | 0.0016626   | 0.005923996 |
| Pden_0645 | <i>def</i>  | peptide deformylase                                                  | 2.05  | 1.31E-04    | 0.001314195 |
| Pden_0646 | <i>def</i>  | peptide deformylase                                                  | 1.38  | 4.56E-04    | 0.002608497 |
| Pden_0648 |             | aminotransferase, class I and II                                     | -1.37 | 2.82E-04    | 0.002004634 |
| Pden_0649 |             | Erk/YbiS/YcfS/YnhG family protein                                    | -1.26 | 0.002052369 | 0.006881553 |
| Pden_0656 |             | phosphoadenylylsulfate reductase (thioredoxin)                       | -1.58 | 0.001624115 | 0.005840986 |
| Pden_0659 | <i>topA</i> | DNA topoisomerase I                                                  | 1.33  | 3.61E-04    | 0.002294387 |
| Pden_0660 | <i>ggt</i>  | gamma-glutamyltransferase 1, Threonine peptidase, MEROPS family T03  | -2.31 | 8.31E-05    | 0.00104193  |
| Pden_0661 |             | protein of unknown function DUF488                                   | 1.62  | 0.00174496  | 0.006122271 |
| Pden_0663 |             | TRAP transporter, 4TM/12TM fusion protein                            | -2.26 | 2.07E-05    | 6.87E-04    |
| Pden_0664 |             | TRAP transporter solute receptor, TAXI family                        | -2.67 | 1.35E-05    | 6.87E-04    |
| Pden_0665 |             | phosphate transporter                                                | 1.37  | 0.001944579 | 0.00663437  |
| Pden_0666 |             | amino acid carrier protein                                           | -1.23 | 0.002654426 | 0.008219791 |
| Pden_0688 | <i>cpoB</i> | conserved hypothetical protein                                       | -1.65 | 3.37E-04    | 0.002227917 |
| Pden_0690 | <i>ftsH</i> | membrane protease FtsH catalytic subunit                             | -1.40 | 0.001231974 | 0.004827776 |
| Pden_0691 |             | chorismate mutase                                                    | 1.61  | 1.99E-04    | 0.001641009 |
| Pden_0702 |             | multisubunit potassium/proton antiporter, PhaG subunit               | -1.08 | 0.00331867  | 0.009712385 |
| Pden_0706 |             | protein of unknown function DUF6, transmembrane                      | 1.94  | 1.25E-04    | 0.001283565 |
| Pden_0707 |             | inositol monophosphatase                                             | 1.64  | 1.97E-04    | 0.001637428 |
| Pden_0716 |             | amino acid ABC transporter substrate-binding protein, PAAT family    | -2.02 | 0.001158529 | 0.004629544 |
| Pden_0717 |             | amino acid ABC transporter membrane protein 1, PAAT family           | -2.16 | 3.53E-04    | 0.00226395  |
| Pden_0718 |             | amino acid ABC transporter membrane protein 2, PAAT family           | -1.68 | 1.00E-04    | 0.001137092 |
| Pden_0719 |             | amino acid ABC transporter ATP-binding protein, PAAT family          | -1.10 | 0.001094949 | 0.00445637  |
| Pden_0721 |             | Patatin                                                              | -2.54 | 7.63E-04    | 0.003564054 |
| Pden_0725 |             | TonB family protein                                                  | -2.40 | 0.001900571 | 0.00651055  |
| Pden_0726 | <i>exbD</i> | outer membrane transport energization protein ExbD                   | -3.19 | 2.73E-05    | 7.03E-04    |
| Pden_0727 | <i>exbB</i> | outer membrane transport energization protein ExbB                   | -2.24 | 6.16E-04    | 0.003133449 |
| Pden_0738 |             | transferase hexapeptide repeat containing protein                    | 1.83  | 7.47E-04    | 0.003509395 |
| Pden_0739 |             | ABC transporter related protein                                      | 2.05  | 3.31E-04    | 0.002212274 |
| Pden_0740 |             | hypothetical protein                                                 | 3.50  | 2.07E-05    | 6.87E-04    |
| Pden_0742 | <i>nusG</i> | transcription antitermination protein nusG                           | 2.56  | 1.37E-05    | 6.87E-04    |
| Pden_0744 | <i>rplA</i> | LSU ribosomal protein L1P                                            | 1.69  | 5.99E-04    | 0.003074387 |
| Pden_0745 | <i>rplJ</i> | LSU ribosomal protein L10P                                           | 2.75  | 2.77E-04    | 0.001988805 |
| Pden_0746 | <i>rplL</i> | LSU ribosomal protein L12P / LSU ribosomal protein L12P              | 2.32  | 4.81E-04    | 0.002695821 |
| Pden_0751 |             | protein of unknown function DUF6, transmembrane                      | 1.39  | 3.69E-04    | 0.002309828 |
| Pden_0752 |             | conserved hypothetical protein                                       | 1.39  | 0.001509555 | 0.005578741 |
| Pden_0757 |             | hypothetical protein                                                 | -2.78 | 1.93E-05    | 6.87E-04    |
| Pden_0760 | <i>rplD</i> | LSU ribosomal protein L4P                                            | 1.81  | 0.001073939 | 0.004417022 |
| Pden_0765 | <i>rpsC</i> | SSU ribosomal protein S3P                                            | 1.49  | 0.002846725 | 0.008646051 |
| Pden_0778 |             | conserved hypothetical protein                                       | 5.21  | 3.04E-06    | 6.87E-04    |
| Pden_0779 | <i>rplO</i> | LSU ribosomal protein L15P                                           | 2.50  | 1.47E-04    | 0.001416878 |
| Pden_0787 |             | N-acyl-L-homoserine lactone synthetase-like protein                  | -2.59 | 4.17E-04    | 0.002469493 |
| Pden_0791 |             | HAD-superfamily hydrolase, subfamily IA, variant 3                   | 1.10  | 0.002647632 | 0.008218861 |

|           |                                                                                                                                                                                              |   |       |             |             |
|-----------|----------------------------------------------------------------------------------------------------------------------------------------------------------------------------------------------|---|-------|-------------|-------------|
| Pden_0793 | L-aspartate-binding protein / L-glutamate-binding protein<br>/L-glutamine-binding protein / L-asparagine-binding protein                                                                     |   | -2.98 | 9.56E-05    | 0.001120928 |
| Pden_0794 | L-asparagine ABC transporter membrane protein / L-glutamate ABC transporter membrane protein<br>/L-glutamate ABC transporter membrane protein / L-aspartate ABC transporter membrane protein |   | -2.92 | 8.85E-05    | 0.001071179 |
| Pden_0795 | L-glutamate ABC transporter membrane protein / L-asparagine ABC transporter membrane protein<br>/L-glutamine ABC transporter membrane protein / L-aspartate ABC transporter membrane protein |   | -2.58 | 2.49E-04    | 0.001844661 |
| Pden_0799 | Citrate (pro-3S)-lyase                                                                                                                                                                       |   | -2.00 | 6.52E-04    | 0.003231196 |
| Pden_0801 | binding-protein-dependent transport systems inner membrane component                                                                                                                         |   | -1.73 | 2.56E-04    | 0.001890373 |
| Pden_0809 | Lytic transglycosylase, catalytic                                                                                                                                                            |   | -1.13 | 0.002277759 | 0.00735009  |
| Pden_0810 | extracellular solute-binding protein, family 5                                                                                                                                               |   | -2.75 | 9.39E-05    | 0.001108203 |
| Pden_0821 | hypothetical protein                                                                                                                                                                         |   | 1.75  | 1.03E-04    | 0.001157656 |
| Pden_0823 | protein of unknown function DUF404                                                                                                                                                           |   | -1.60 | 1.72E-04    | 0.001509512 |
| Pden_0824 | protein of unknown function DUF403                                                                                                                                                           |   | -1.54 | 2.07E-04    | 0.00167015  |
| Pden_0829 | extracellular solute-binding protein, family 1                                                                                                                                               |   | -3.34 | 8.53E-06    | 6.87E-04    |
| Pden_0830 | binding-protein-dependent transport systems inner membrane component                                                                                                                         |   | -2.96 | 2.37E-04    | 0.001782039 |
| Pden_0831 | binding-protein-dependent transport systems inner membrane component                                                                                                                         |   | -2.60 | 4.09E-05    | 8.15E-04    |
| Pden_0832 | ABC transporter related protein                                                                                                                                                              |   | -1.96 | 1.30E-04    | 0.001314195 |
| Pden_0841 | hypothetical protein                                                                                                                                                                         |   | -2.71 | 2.85E-04    | 0.00201284  |
| Pden_0848 | Malate dehydrogenase (oxaloacetate-decarboxylating) (NADP(+)), Phosphate acetyltransferase                                                                                                   |   | -1.53 | 0.001491409 | 0.005527823 |
| Pden_0851 | <i>pncA</i> Nicotinamidase                                                                                                                                                                   |   | -2.44 | 7.56E-04    | 0.003539627 |
| Pden_0852 | <i>pncB</i> nicotinate phosphoribosyltransferase                                                                                                                                             |   | -2.65 | 6.40E-06    | 6.87E-04    |
| Pden_0855 | <i>gpt</i> Xanthine phosphoribosyltransferase                                                                                                                                                |   | -1.42 | 2.23E-04    | 0.00171547  |
| Pden_0858 | <i>pdxH</i> Pyridoxamine 5'-phosphate oxidase                                                                                                                                                |   | -1.96 | 1.06E-04    | 0.001171118 |
| Pden_0864 | ABC transporter related protein                                                                                                                                                              |   | 3.66  | 1.81E-05    | 6.87E-04    |
| Pden_0865 | transport system permease protein                                                                                                                                                            |   | 3.39  | 2.62E-04    | 0.001926306 |
| Pden_0866 | periplasmic binding protein                                                                                                                                                                  |   | 2.35  | 3.04E-05    | 7.09E-04    |
| Pden_0867 | <i>tsaA</i> protein of unknown function UPF0066                                                                                                                                              |   | 2.48  | 1.21E-05    | 6.87E-04    |
| Pden_0868 | hypothetical protein                                                                                                                                                                         |   | 2.26  | 2.05E-05    | 6.87E-04    |
| Pden_0869 | conserved hypothetical protein                                                                                                                                                               |   | 2.20  | 5.07E-05    | 9.00E-04    |
| Pden_0872 | <i>rpmH</i> LSU ribosomal protein L34P                                                                                                                                                       |   | 1.48  | 4.61E-04    | 0.002628348 |
| Pden_0873 | <i>rnpA</i> ribonuclease P protein component                                                                                                                                                 |   | 1.88  | 9.84E-05    | 0.001137092 |
| Pden_0874 | <i>yidD</i> protein of unknown function DUF37                                                                                                                                                |   | 2.01  | 1.46E-04    | 0.00141608  |
| Pden_0875 | <i>ttcA</i> PP-Loop domain protein                                                                                                                                                           |   | 1.79  | 0.001746111 | 0.006122271 |
| Pden_0876 | diguanylate phosphodiesterase                                                                                                                                                                |   | 3.46  | 1.82E-05    | 6.87E-04    |
| Pden_0877 | <i>yidC</i> protein translocase subunit yidC                                                                                                                                                 |   | 1.14  | 0.001697137 | 0.006011301 |
| Pden_0878 | MOSC domain containing protein                                                                                                                                                               |   | 2.39  | 5.21E-05    | 9.01E-04    |
| Pden_0879 | <i>engB</i> small GTP-binding protein                                                                                                                                                        |   | 2.59  | 7.64E-05    | 0.001002704 |
| Pden_0886 | hypothetical protein                                                                                                                                                                         |   | 3.14  | 0.001256538 | 0.004886217 |
| Pden_0895 | <i>prmC</i> [protein release factor]-glutamine N5-methyltransferase                                                                                                                          |   | 2.57  | 2.28E-04    | 0.001730572 |
| Pden_0896 | conserved hypothetical protein                                                                                                                                                               |   | 1.57  | 2.71E-04    | 0.001970419 |
| Pden_0909 | <i>tatC</i> Sec-independent protein translocase, TatC subunit                                                                                                                                |   | -1.04 | 0.002388697 | 0.007591949 |
| Pden_0911 | penicillin amidase, Cysteine peptidase, MEROPS family C59                                                                                                                                    |   | -2.10 | 4.02E-04    | 0.00240555  |
| Pden_0922 | <i>prtC</i> bacterial peptide chain release factor 3 (bRF-3)                                                                                                                                 |   | 1.95  | 0.001090882 | 0.004446969 |
| Pden_0926 | protein of unknown function DUF305                                                                                                                                                           |   | -2.82 | 0.001345336 | 0.005116549 |
| Pden_0930 | hypothetical protein                                                                                                                                                                         |   | -2.50 | 1.68E-05    | 6.87E-04    |
| Pden_0931 | extracellular solute-binding protein, family 5                                                                                                                                               |   | -1.39 | 0.001291564 | 0.004968989 |
| Pden_0932 | 3-hydroxybutyrate dehydrogenase                                                                                                                                                              |   | -2.64 | 0.002190673 | 0.007174243 |
| Pden_0935 | Glyoxalase/bleomycin resistance protein/dioxygenase                                                                                                                                          |   | -1.61 | 3.89E-04    | 0.002358731 |
| Pden_0939 | <i>aspA</i> aspartate ammonia-lyase                                                                                                                                                          |   | -2.42 | 9.32E-05    | 0.001105227 |
| Pden_0945 | Substrate-binding region of ABC-type glycine betaine transport system                                                                                                                        |   | -1.84 | 0.001317477 | 0.005034736 |
| Pden_0946 | binding-protein-dependent transport systems inner membrane component                                                                                                                         |   | -1.92 | 5.26E-04    | 0.002843317 |
| Pden_0947 | glycine betaine/L-proline ABC transporter, ATPase subunit                                                                                                                                    |   | -2.09 | 0.002115075 | 0.007017446 |
| Pden_0954 | cold-shock DNA-binding protein family                                                                                                                                                        |   | -2.38 | 0.00267388  | 0.008249759 |
| Pden_0957 | <i>phaZ</i> polyhydroxyalkanoate depolymerase, intracellular                                                                                                                                 |   | -3.80 | 0.001038143 | 0.00432914  |
| Pden_0958 | <i>phaC</i> poly(R)-hydroxyalkanoic acid synthase, class I                                                                                                                                   |   | -2.89 | 1.06E-05    | 6.87E-04    |
| Pden_0959 | conserved hypothetical protein                                                                                                                                                               |   | 1.75  | 2.00E-04    | 0.001641009 |
| Pden_0961 | phage integrase family protein                                                                                                                                                               | 2 | -1.99 | 2.16E-04    | 0.001694513 |
| Pden_0962 | conserved hypothetical protein                                                                                                                                                               | 2 | -1.96 | 0.001364217 | 0.005166067 |
| Pden_0970 | DNA polymerase III beta subunit family protein                                                                                                                                               | 2 | 2.05  | 4.78E-04    | 0.002686491 |
| Pden_0971 | hypothetical protein                                                                                                                                                                         | 2 | -1.32 | 0.001631432 | 0.005853961 |
| Pden_0972 | hypothetical protein                                                                                                                                                                         | 2 | -1.44 | 3.38E-04    | 0.002227917 |
| Pden_0973 | hypothetical protein                                                                                                                                                                         | 2 | -3.09 | 4.55E-04    | 0.0026076   |
| Pden_0978 | hypothetical protein                                                                                                                                                                         | 2 | -3.84 | 4.73E-04    | 0.002669604 |
| Pden_0983 | phage/plasmid primase, P4 family                                                                                                                                                             | 2 | 1.49  | 4.62E-04    | 0.002630851 |
| Pden_0986 | hypothetical protein                                                                                                                                                                         | 2 | 3.01  | 8.28E-04    | 0.003758078 |
| Pden_0987 | Resolvase helix-turn-helix domain protein                                                                                                                                                    | 2 | 3.94  | 1.12E-05    | 6.87E-04    |
| Pden_0988 | phage Terminase                                                                                                                                                                              | 2 | 4.19  | 4.90E-06    | 6.87E-04    |
| Pden_0989 | phage portal protein, HK97 family                                                                                                                                                            | 2 | 3.90  | 7.67E-06    | 6.87E-04    |
| Pden_0990 | peptidase S14, ClpP                                                                                                                                                                          | 2 | 2.54  | 6.41E-05    | 9.38E-04    |
| Pden_0991 | phage major capsid protein, HK97 family                                                                                                                                                      | 2 | 1.88  | 3.45E-04    | 0.002238614 |
| Pden_0993 | hypothetical protein                                                                                                                                                                         | 2 | 1.75  | 0.002138223 | 0.007066463 |
| Pden_0994 | hypothetical protein                                                                                                                                                                         | 2 | 2.51  | 1.25E-04    | 0.001286187 |
| Pden_0996 | gene transfer agent                                                                                                                                                                          | 2 | 3.61  | 0.001052328 | 0.004364031 |
| Pden_1003 | conserved hypothetical protein                                                                                                                                                               |   | 1.45  | 0.002372865 | 0.007565375 |
| Pden_1004 | hypothetical protein                                                                                                                                                                         |   | 2.55  | 5.89E-05    | 9.13E-04    |
| Pden_1008 | <i>pta</i> phosphate acetyltransferase                                                                                                                                                       |   | 2.20  | 0.001330838 | 0.005073821 |
| Pden_1009 | conserved hypothetical protein 698                                                                                                                                                           |   | 2.08  | 0.00104852  | 0.004358501 |
| Pden_1017 | transposase IS116/IS110/IS902 family protein                                                                                                                                                 |   | -2.41 | 0.001209419 | 0.004754106 |
| Pden_1020 | transcriptional regulator, LysR family                                                                                                                                                       |   | -1.68 | 2.00E-04    | 0.001641009 |
| Pden_1021 | spermidine/putrescine ABC transporter, periplasmic binding protein, putative                                                                                                                 |   | -2.82 | 7.94E-04    | 0.003647678 |
| Pden_1023 | binding-protein-dependent transport systems inner membrane component                                                                                                                         |   | -2.13 | 0.00209069  | 0.006968507 |
| Pden_1024 | ABC transporter related protein                                                                                                                                                              |   | -2.23 | 0.001881956 | 0.006469312 |
| Pden_1032 | monosaccharide ABC transporter substrate-binding protein, CUT2 family                                                                                                                        |   | -2.34 | 6.28E-05    | 9.34E-04    |
| Pden_1033 | monosaccharide ABC transporter ATP-binding protein, CUT2 family                                                                                                                              |   | -2.40 | 5.59E-05    | 9.01E-04    |
| Pden_1037 | amidohydrolase                                                                                                                                                                               |   | -1.18 | 0.001346088 | 0.005116549 |
| Pden_1038 | protein of unknown function DUF6, transmembrane                                                                                                                                              |   | 1.70  | 2.03E-04    | 0.001651967 |
| Pden_1056 | hypothetical protein                                                                                                                                                                         |   | 2.24  | 6.53E-05    | 9.42E-04    |
| Pden_1057 | N-isopropylammelide isopropylaminohydrolase                                                                                                                                                  |   | -2.68 | 3.48E-04    | 0.002243683 |

|           |             |                                                                       |       |             |             |
|-----------|-------------|-----------------------------------------------------------------------|-------|-------------|-------------|
| Pden_1062 |             | flavin reductase domain protein, FMN-binding protein                  | -2.10 | 5.54E-05    | 9.01E-04    |
| Pden_1077 |             | carbohydrate ABC transporter ATP-binding protein, CUT1 family         | 3.19  | 2.38E-05    | 6.88E-04    |
| Pden_1079 |             | binding-protein-dependent transport systems inner membrane component  | 4.11  | 2.15E-05    | 6.88E-04    |
| Pden_1080 |             | beta-lactamase domain protein                                         | 4.17  | 1.62E-05    | 6.87E-04    |
| Pden_1090 |             | carbohydrate ABC transporter substrate-binding protein, CUT1 family   | -1.58 | 0.002543101 | 0.007983175 |
| Pden_1092 |             | acetolactate synthase, large subunit                                  | -3.06 | 1.79E-04    | 0.001533089 |
| Pden_1094 |             | conserved hypothetical protein                                        | -2.24 | 1.67E-04    | 0.001505274 |
| Pden_1100 |             | major facilitator superfamily MFS_1                                   | 1.74  | 6.27E-04    | 0.003151095 |
| Pden_1130 |             | conserved hypothetical protein                                        | 4.42  | 5.90E-04    | 0.003052963 |
| Pden_1131 |             | conserved hypothetical protein                                        | 3.04  | 7.73E-04    | 0.003597541 |
| Pden_1132 |             | PRC-barrel containing protein                                         | 2.51  | 3.28E-04    | 0.002205051 |
| Pden_1134 |             | short-chain dehydrogenase/reductase SDR                               | 1.00  | 0.002601094 | 0.008099224 |
| Pden_1136 |             | protein of unknown function DUF892                                    | 2.82  | 1.41E-05    | 6.87E-04    |
| Pden_1138 |             | transcriptional regulator, AraC family                                | -1.77 | 8.11E-04    | 0.003696149 |
| Pden_1142 |             | ABC transporter related protein                                       | 1.96  | 0.001053199 | 0.004364031 |
| Pden_1143 |             | ABC transporter related protein                                       | 1.53  | 0.003075685 | 0.009170902 |
| Pden_1147 |             | amino acid ABC transporter substrate-binding protein, PAAT family     | -3.04 | 0.001056221 | 0.004364031 |
| Pden_1148 |             | amino acid ABC transporter membrane protein 1, PAAT family            | -2.85 | 1.74E-04    | 0.0015113   |
| Pden_1149 |             | amino acid ABC transporter membrane protein 2, PAAT family            | -3.08 | 6.84E-04    | 0.00331005  |
| Pden_1150 |             | amino acid ABC transporter ATP-binding protein, PAAT family           | -2.29 | 3.38E-04    | 0.002227917 |
| Pden_1151 |             | agmatinase                                                            | -1.35 | 0.001218587 | 0.004786429 |
| Pden_1157 |             | periplasmic binding protein                                           | 2.38  | 9.45E-04    | 0.004070411 |
| Pden_1158 |             | conserved hypothetical protein                                        | 2.74  | 4.87E-05    | 8.89E-04    |
| Pden_1161 |             | D-isomer specific 2-hydroxyacid dehydrogenase, NAD-binding protein    | 1.36  | 0.002899917 | 0.008760311 |
| Pden_1162 |             | Arginase/agmatinase/formiminoglutamase                                | 1.85  | 0.003217526 | 0.009468264 |
| Pden_1163 |             | NUDIX hydrolase                                                       | 2.50  | 5.92E-04    | 0.00305499  |
| Pden_1167 |             | molybdenum ABC transporter, periplasmic molybdate-binding protein     | 1.75  | 1.61E-04    | 0.001491729 |
| Pden_1168 |             | periplasmic binding protein                                           | 1.73  | 8.57E-04    | 0.003825716 |
| Pden_1169 |             | transport system permease protein                                     | 2.27  | 0.003117722 | 0.009239266 |
| Pden_1170 |             | ABC transporter related protein                                       | 3.16  | 2.72E-04    | 0.001970419 |
| Pden_1171 |             | TonB-dependent receptor                                               | 1.56  | 7.92E-04    | 0.003644887 |
| Pden_1172 |             | TOBE domain protein                                                   | -3.54 | 2.77E-06    | 6.87E-04    |
| Pden_1176 | <i>catA</i> | catechol 1,2-dioxygenase                                              | -4.06 | 0.001685714 | 0.005980919 |
| Pden_1186 | <i>fdhA</i> | glutathione-independent formaldehyde dehydrogenase                    | -3.03 | 7.40E-05    | 9.86E-04    |
| Pden_1188 |             | ferredoxin                                                            | -1.53 | 0.001591569 | 0.005776426 |
| Pden_1193 |             | glycine betaine/L-proline ABC transporter, ATPase subunit             | -2.15 | 0.002400089 | 0.007623371 |
| Pden_1194 |             | binding-protein-dependent transport systems inner membrane component  | -1.92 | 5.26E-04    | 0.00284302  |
| Pden_1195 |             | Substrate-binding region of ABC-type glycine betaine transport system | -1.84 | 0.001318043 | 0.005034736 |
| Pden_1197 | <i>hpbA</i> | NADH:flavin oxidoreductase/NADH oxidase                               | -1.16 | 0.002429284 | 0.007696786 |
| Pden_1199 |             | amidohydrolase                                                        | -3.22 | 8.18E-05    | 0.0010329   |
| Pden_1200 |             | conserved hypothetical protein                                        | -2.62 | 1.12E-04    | 0.001193485 |
| Pden_1201 |             | conserved hypothetical protein                                        | -1.78 | 0.00110413  | 0.004476884 |
| Pden_1204 | <i>dal</i>  | D-alanine--D-alanine ligase                                           | -2.16 | 9.81E-05    | 0.001136331 |
| Pden_1212 | <i>ureD</i> | Urease accessory protein UreD                                         | 2.33  | 0.002026337 | 0.006816224 |
| Pden_1214 |             | transcriptional regulator, ArsR family                                | -1.84 | 0.001311362 | 0.005018463 |
| Pden_1215 |             | Activator of Hsp90 ATPase 1 family protein                            | -2.13 | 2.51E-04    | 0.001854347 |
| Pden_1221 |             | transposase, IS4 family                                               | 1.49  | 8.97E-04    | 0.003925429 |
| Pden_1222 |             | transposase-like protein                                              | 1.46  | 0.001716465 | 0.006050604 |
| Pden_1223 |             | phage integrase family protein                                        | 1.30  | 0.002793323 | 0.00852433  |
| Pden_1225 |             | hypothetical protein                                                  | -1.94 | 2.82E-04    | 0.002004634 |
| Pden_1229 |             | hypothetical protein                                                  | -2.20 | 0.002831053 | 0.00860878  |
| Pden_1247 |             | glutathionylspermidine synthase                                       | -1.41 | 0.001969504 | 0.006683376 |
| Pden_1248 |             | extracellular solute-binding protein, family 5                        | -2.13 | 1.30E-04    | 0.001314195 |
| Pden_1250 |             | binding-protein-dependent transport systems inner membrane component  | -1.49 | 0.003114626 | 0.009239266 |
| Pden_1252 |             | ABC transporter related protein                                       | -1.30 | 0.002714476 | 0.008329327 |
| Pden_1255 |             | short-chain dehydrogenase/reductase SDR                               | -2.91 | 1.69E-04    | 0.00150607  |
| Pden_1256 |             | ABC-3 protein                                                         | -2.27 | 3.61E-04    | 0.002294387 |
| Pden_1257 |             | ABC-3 protein                                                         | -2.60 | 5.86E-05    | 9.13E-04    |
| Pden_1258 |             | ABC transporter related protein                                       | -2.70 | 7.58E-05    | 0.001002205 |
| Pden_1259 |             | periplasmic solute binding protein                                    | -3.57 | 4.80E-05    | 8.86E-04    |
| Pden_1265 | <i>clpP</i> | ATP-dependent Clp protease proteolytic subunit ClpP                   | -1.98 | 0.002994665 | 0.008987544 |
| Pden_1271 | <i>accC</i> | acetyl-CoA carboxylase carboxyltransferase subunit alpha              | -1.35 | 0.003420113 | 0.009889224 |
| Pden_1277 |             | uracil-xanthine permease                                              | -3.56 | 1.76E-05    | 6.87E-04    |
| Pden_1284 |             | multisubunit potassium/proton antiporter, PhaG subunit                | -1.05 | 0.002299629 | 0.007387705 |
| Pden_1297 | <i>fci</i>  | NAD-dependent epimerase/dehydratase                                   | 3.21  | 1.23E-04    | 0.001274131 |
| Pden_1298 | <i>gmd</i>  | GDP-mannose 4,6-dehydratase                                           | 2.65  | 7.86E-06    | 6.87E-04    |
| Pden_1305 |             | Antibiotic biosynthesis monooxygenase                                 | -3.32 | 2.36E-05    | 6.88E-04    |
| Pden_1306 |             | Cobyrinic acid a,c-diamide synthase                                   | -1.87 | 7.19E-05    | 9.81E-04    |
| Pden_1308 | <i>uvrB</i> | Excinuclease ABC subunit B                                            | -1.66 | 0.003140266 | 0.009292324 |
| Pden_1315 | <i>mdoH</i> | glycosyl transferase, family 2                                        | 1.08  | 0.002205847 | 0.007214602 |
| Pden_1316 |             | conserved hypothetical protein                                        | 1.84  | 6.88E-04    | 0.00331005  |
| Pden_1322 |             | conserved hypothetical protein                                        | 1.89  | 0.002798302 | 0.008529684 |
| Pden_1323 |             | pyridoxamine 5'-phosphate oxidase-related, FMN-binding protein        | -1.69 | 1.07E-04    | 0.001176884 |
| Pden_1324 |             | oligopeptide/dipeptide ABC transporter, ATPase subunit                | -1.44 | 5.67E-04    | 0.00297487  |
| Pden_1325 |             | oligopeptide/dipeptide ABC transporter, ATPase subunit                | -1.39 | 0.001270728 | 0.004922492 |
| Pden_1326 |             | binding-protein-dependent transport systems inner membrane component  | -2.17 | 5.12E-05    | 9.00E-04    |
| Pden_1327 | <i>oppB</i> | binding-protein-dependent transport systems inner membrane component  | -3.49 | 4.86E-06    | 6.87E-04    |
| Pden_1328 |             | extracellular solute-binding protein, family 5                        | -3.91 | 3.31E-04    | 0.002212274 |
| Pden_1341 |             | extracellular solute-binding protein, family 5                        | 3.58  | 8.17E-06    | 6.87E-04    |
| Pden_1342 |             | binding-protein-dependent transport systems inner membrane component  | 3.80  | 5.01E-05    | 9.00E-04    |
| Pden_1343 |             | binding-protein-dependent transport systems inner membrane component  | 3.94  | 2.14E-04    | 0.001694513 |
| Pden_1344 |             | ABC transporter related protein                                       | 2.55  | 8.10E-04    | 0.003693153 |
| Pden_1346 | <i>prpB</i> | 2,3-dimethylmalate lyase                                              | -2.44 | 6.20E-04    | 0.003143656 |
| Pden_1347 | <i>prpC</i> | 2-methylcitrate synthase                                              | -2.51 | 7.36E-04    | 0.003470891 |
| Pden_1348 |             | 2-methylcitrate dehydratase                                           | -1.92 | 6.84E-04    | 0.00331005  |
| Pden_1355 |             | methionine synthase (B12-independent)                                 | -2.83 | 8.05E-04    | 0.003682344 |
| Pden_1362 |             | periplasmic binding protein                                           | -1.29 | 0.001406434 | 0.00527856  |

|           |             |                                                                      |       |             |             |
|-----------|-------------|----------------------------------------------------------------------|-------|-------------|-------------|
| Pden_1372 |             | phosphoesterase or phosphohydrolase-like protein                     | 2.33  | 0.002098161 | 0.006983413 |
| Pden_1373 |             | ATP-dependent Lon protease                                           | 3.35  | 1.22E-04    | 0.00126941  |
| Pden_1374 |             | metallophosphoesterase                                               | 2.71  | 1.70E-05    | 6.87E-04    |
| Pden_1376 | <i>lipA</i> | lipic acid synthetase                                                | -2.26 | 0.001169221 | 0.004646598 |
| Pden_1377 |             | Redoxin domain protein                                               | 3.81  | 7.26E-05    | 9.81E-04    |
| Pden_1380 |             | protein of unknown function DUF853, NPT hydrolase putative           | -1.84 | 6.97E-04    | 0.003346308 |
| Pden_1382 |             | protease Do                                                          | -2.17 | 0.001038891 | 0.00432914  |
| Pden_1383 |             | hypothetical protein                                                 | -2.01 | 9.95E-04    | 0.004206003 |
| Pden_1384 |             | ribonucleoside-diphosphate reductase class II                        | -2.40 | 2.77E-04    | 0.001988805 |
| Pden_1395 |             | aminotransferase, class V                                            | -1.54 | 0.001962537 | 0.006668949 |
| Pden_1397 |             | L-glutamine synthetase                                               | -1.93 | 0.001756559 | 0.006137651 |
| Pden_1420 | <i>dusA</i> | tRNA-U16,U17-dihydrouridine synthase                                 | 1.51  | 8.10E-04    | 0.003693153 |
| Pden_1427 |             | TonB-dependent receptor                                              | 1.80  | 5.12E-04    | 0.002788261 |
| Pden_1428 |             | transcriptional regulator, AraC family                               | 1.82  | 0.002019802 | 0.006808426 |
| Pden_1431 |             | transcriptional regulator, GntR family                               | -2.60 | 5.11E-05    | 9.00E-04    |
| Pden_1432 |             | BioY protein                                                         | -1.96 | 4.40E-04    | 0.00254936  |
| Pden_1433 | <i>bioB</i> | biotin synthase                                                      | -2.55 | 1.95E-05    | 6.87E-04    |
| Pden_1436 |             | MOSC domain containing protein                                       | -1.32 | 0.002270739 | 0.007336792 |
| Pden_1443 |             | conserved hypothetical protein                                       | -1.89 | 0.001166275 | 0.004645832 |
| Pden_1449 |             | conserved hypothetical protein                                       | 1.60  | 0.001855333 | 0.00641198  |
| Pden_1455 |             | major facilitator superfamily MFS_1                                  | -3.15 | 7.83E-04    | 0.003626579 |
| Pden_1461 |             | GCN5-related N-acetyltransferase                                     | -2.45 | 3.97E-04    | 0.002393936 |
| Pden_1463 |             | transcriptional regulator, LysR family                               | -2.43 | 0.00187387  | 0.00645841  |
| Pden_1466 |             | helix-turn-helix- domain containing protein, AraC type               | -2.49 | 3.15E-05    | 7.09E-04    |
| Pden_1468 |             | protein of unknown function DUF1234                                  | -1.44 | 8.09E-04    | 0.003693153 |
| Pden_1482 |             | conjugal transfer protein trbB                                       | 2.29  | 8.65E-04    | 0.003825889 |
| Pden_1492 |             | ABC transporter related protein                                      | -1.84 | 9.86E-05    | 0.001137092 |
| Pden_1496 |             | major facilitator superfamily MFS_1                                  | 1.47  | 0.001153375 | 0.00461259  |
| Pden_1497 |             | transcriptional regulator, AraC family                               | -5.24 | 2.40E-05    | 6.88E-04    |
| Pden_1506 |             | TRAG family protein                                                  | 1.70  | 6.15E-04    | 0.003131842 |
| Pden_1510 |             | conjugal transfer protein precursor                                  | 2.68  | 3.69E-04    | 0.002309828 |
| Pden_1512 |             | replication protein A                                                | 2.45  | 0.003284787 | 0.009635503 |
| Pden_1518 |             | protein of unknown function DUF736                                   | 3.96  | 6.85E-04    | 0.00331005  |
| Pden_1519 |             | hypothetical protein                                                 | 3.17  | 4.42E-04    | 0.00255247  |
| Pden_1525 |             | hypothetical protein                                                 | -2.61 | 0.000362817 | 0.002299054 |
| Pden_1526 |             | helicase domain protein                                              | -2.49 | 3.08E-05    | 7.09E-04    |
| Pden_1527 |             | DEAD/DEAH box helicase domain protein                                | -2.53 | 5.88E-05    | 9.13E-04    |
| Pden_1528 |             | protein of unknown function DUF262                                   | -2.80 | 5.62E-04    | 0.002961881 |
| Pden_1529 |             | conserved hypothetical protein                                       | -1.69 | 9.26E-05    | 0.001100653 |
| Pden_1530 |             | hypothetical protein                                                 | -1.92 | 5.66E-04    | 0.00297487  |
| Pden_1534 |             | filamentation induced by cAMP protein Fic                            | -1.85 | 0.002048127 | 0.006871879 |
| Pden_1541 |             | ParB family protein                                                  | 3.04  | 1.04E-04    | 0.001161644 |
| Pden_1543 |             | conserved hypothetical protein                                       | 4.77  | 4.89E-04    | 0.002721641 |
| Pden_1544 |             | domain of unknown function DUF1738                                   | 4.07  | 6.01E-05    | 9.25E-04    |
| Pden_1545 |             | histone family protein nucleoid-structuring protein H-NS             | -3.50 | 4.56E-06    | 6.87E-04    |
| Pden_1546 |             | ORF-3 family protein                                                 | -3.65 | 7.96E-05    | 0.001019694 |
| Pden_1548 |             | HipA domain protein                                                  | -1.31 | 6.05E-04    | 0.003092881 |
| Pden_1551 |             | protein of unknown function DUF481                                   | -2.31 | 6.50E-04    | 0.003223566 |
| Pden_1558 |             | Capsule polysaccharide biosynthesis                                  | 2.58  | 0.001042715 | 0.0043415   |
| Pden_1559 |             | polysaccharide export protein                                        | -2.07 | 0.001004826 | 0.004225445 |
| Pden_1562 | <i>nrdR</i> | ATP-cone domain protein                                              | -1.69 | 0.001697839 | 0.006011301 |
| Pden_1563 |             | TRAP dicarboxylate transporter- DctP subunit                         | -4.17 | 3.03E-05    | 7.09E-04    |
| Pden_1564 |             | TRAP dicarboxylate transporter, DctM subunit                         | -1.33 | 6.99E-04    | 0.003354223 |
| Pden_1569 |             | extracellular solute-binding protein, family 5                       | -3.90 | 2.99E-04    | 0.002061667 |
| Pden_1570 | <i>oppB</i> | binding-protein-dependent transport systems inner membrane component | -3.49 | 4.85E-06    | 6.87E-04    |
| Pden_1571 |             | binding-protein-dependent transport systems inner membrane component | -2.17 | 5.12E-05    | 9.00E-04    |
| Pden_1572 |             | oligopeptide/dipeptide ABC transporter, ATPase subunit               | -1.39 | 0.001269456 | 0.004921331 |
| Pden_1573 |             | oligopeptide/dipeptide ABC transporter, ATPase subunit               | -1.44 | 5.67E-04    | 0.00297487  |
| Pden_1574 |             | pyridoxamine 5'-phosphate oxidase-related, FMN-binding protein       | -1.69 | 1.08E-04    | 0.001177715 |
| Pden_1575 |             | conserved hypothetical protein                                       | 1.91  | 0.002949957 | 0.008874411 |
| Pden_1581 |             | conserved hypothetical protein                                       | 1.84  | 6.87E-04    | 0.00331005  |
| Pden_1582 | <i>mdoH</i> | glycosyl transferase, family 2                                       | 1.10  | 0.001950252 | 0.00664103  |
| Pden_1584 |             | hypothetical protein                                                 | 2.61  | 0.002117893 | 0.007022197 |
| Pden_1590 |             | plasmid segregation oscillating ATPase ParF                          | -1.87 | 7.18E-05    | 9.81E-04    |
| Pden_1591 |             | Antibiotic biosynthesis monooxygenase                                | -3.32 | 2.36E-05    | 6.88E-04    |
| Pden_1595 |             | ABC transporter related protein                                      | 2.91  | 6.19E-05    | 9.33E-04    |
| Pden_1596 |             | ABC-3 protein                                                        | 2.43  | 9.65E-04    | 0.004115048 |
| Pden_1603 |             | Dihydrolipoyllysine-residue succinyltransferase                      | 1.44  | 0.002794862 | 0.00852433  |
| Pden_1604 |             | Transketolase, central region                                        | 1.07  | 0.003454511 | 0.00996592  |
| Pden_1605 |             | flavoprotein                                                         | -1.29 | 0.002705269 | 0.008311152 |
| Pden_1610 |             | binding-protein-dependent transport systems inner membrane component | 2.68  | 8.60E-04    | 0.003825716 |
| Pden_1611 |             | ABC transporter related protein                                      | 2.52  | 0.001650172 | 0.005905195 |
| Pden_1620 |             | flagellin domain protein                                             | -3.35 | 0.002125117 | 0.007041535 |
| Pden_1624 |             | transposase IS3/IS911 family protein                                 | 2.02  | 0.001612076 | 0.005813604 |
| Pden_1629 |             | RNA polymerase, sigma-24 subunit, ECF subfamily                      | 2.68  | 3.47E-05    | 7.44E-04    |
| Pden_1630 |             | putative FecR                                                        | 1.91  | 9.90E-05    | 0.001137092 |
| Pden_1631 |             | TonB-dependent receptor, plug                                        | 2.84  | 2.54E-05    | 7.00E-04    |
| Pden_1632 |             | hypothetical protein                                                 | 3.45  | 0.001625795 | 0.005840986 |
| Pden_1633 |             | uncharacterized enzyme                                               | 2.28  | 3.17E-04    | 0.002148938 |
| Pden_1636 |             | isochorismatase hydrolase                                            | 2.98  | 6.20E-04    | 0.003143656 |
| Pden_1640 | <i>pta</i>  | phosphotransacetylase                                                | 2.16  | 0.001423591 | 0.005327157 |
| Pden_1641 |             | conserved hypothetical protein 698                                   | 2.14  | 9.48E-04    | 0.004070411 |
| Pden_1653 |             | lytic murein transglycosylase                                        | -1.93 | 3.25E-04    | 0.002189096 |
| Pden_1657 | <i>panB</i> | ketopantoate hydroxymethyltransferase                                | -1.02 | 0.001822465 | 0.006319958 |
| Pden_1662 |             | Hemolysin-type calcium-binding region                                | -2.34 | 3.71E-04    | 0.002309828 |
| Pden_1666 |             | L-lysine 2,3-aminomutase                                             | 1.70  | 1.16E-04    | 0.001218765 |
| Pden_1667 |             | ABC transporter related protein                                      | -1.77 | 1.73E-04    | 0.001509512 |



|           |             |                                                                                                   |       |             |             |
|-----------|-------------|---------------------------------------------------------------------------------------------------|-------|-------------|-------------|
| Pden_1668 |             | ABC transporter related protein                                                                   | -2.04 | 0.001140538 | 0.004578915 |
| Pden_1669 |             | binding-protein-dependent transport systems inner membrane component                              | -2.37 | 4.90E-04    | 0.002725905 |
| Pden_1670 |             | binding-protein-dependent transport systems inner membrane component                              | -2.85 | 2.55E-05    | 7.00E-04    |
| Pden_1671 |             | extracellular solute-binding protein, family 5                                                    | -5.62 | 2.64E-04    | 0.00192913  |
| Pden_1672 | <i>iolB</i> | 5-deoxyglucuronate isomerase                                                                      | -1.84 | 1.60E-04    | 0.001489115 |
| Pden_1673 |             | conserved hypothetical protein                                                                    | -2.15 | 7.15E-04    | 0.00340186  |
| Pden_1674 | <i>iolE</i> | 2-keto-myo-inositol dehydratase                                                                   | -2.14 | 6.58E-04    | 0.003245718 |
| Pden_1675 | <i>iolD</i> | 3D-(3,5/4)-trihydroxycyclohexane-1,2-dione hydrolase                                              | -1.79 | 0.0020993   | 0.006983413 |
| Pden_1678 | <i>iolG</i> | myo-inositol 2-dehydrogenase                                                                      | -2.36 | 2.62E-04    | 0.001926306 |
| Pden_1680 |             | oxidoreductase domain protein                                                                     | -2.35 | 2.48E-04    | 0.00184162  |
| Pden_1681 |             | monosaccharide ABC transporter substrate-binding protein, CUT2 family                             | -3.76 | 2.97E-04    | 0.002051463 |
| Pden_1682 |             | monosaccharide ABC transporter membrane protein, CUT2 family                                      | -3.81 | 2.05E-05    | 6.87E-04    |
| Pden_1683 | <i>rhsA</i> | monosaccharide ABC transporter ATP-binding protein, CUT2 family                                   | -4.05 | 1.11E-04    | 0.00118365  |
| Pden_1684 |             | monosaccharide ABC transporter substrate-binding protein, CUT2 family                             | -3.72 | 4.62E-05    | 8.76E-04    |
| Pden_1688 |             | conserved hypothetical protein                                                                    | 1.77  | 0.001555936 | 0.005687871 |
| Pden_1692 |             | creatinase                                                                                        | -1.51 | 0.003159321 | 0.009336478 |
| Pden_1693 |             | major facilitator superfamily MFS_1                                                               | -3.27 | 2.27E-04    | 0.001730572 |
| Pden_1695 | <i>fbp</i>  | D-fructose 1,6-bisphosphatase                                                                     | -2.99 | 9.36E-04    | 0.004043846 |
| Pden_1697 | <i>tkt</i>  | transketolase                                                                                     | -2.31 | 3.27E-04    | 0.002198565 |
| Pden_1698 |             | fructose-bisphosphate aldolase                                                                    | -3.10 | 9.30E-04    | 0.004030546 |
| Pden_1699 | <i>cbbL</i> | ribulose-1,5-bisphosphate carboxylase/oxygenase large subunit                                     | -3.44 | 2.64E-04    | 0.001931095 |
| Pden_1700 |             | ribulose 1,5-bisphosphate carboxylase small subunit                                               | -3.08 | 0.002722227 | 0.008342998 |
| Pden_1701 | <i>cbbX</i> | AAA ATPase, central domain protein                                                                | -1.45 | 0.001283293 | 0.004945029 |
| Pden_1710 |             | Betaine-aldehyde dehydrogenase                                                                    | -5.98 | 0.002896496 | 0.008755198 |
| Pden_1712 |             | glucose-methanol-choline oxidoreductase                                                           | -2.60 | 6.97E-05    | 9.69E-04    |
| Pden_1713 |             | amino acid/amide ABC transporter membrane protein 2, HAAT family                                  | -3.31 | 1.52E-05    | 6.87E-04    |
| Pden_1714 |             | amino acid/amide ABC transporter membrane protein 1, HAAT family                                  | -3.38 | 4.65E-05    | 8.76E-04    |
| Pden_1715 |             | amino acid/amide ABC transporter ATP-binding protein 2, HAAT family                               | -2.92 | 1.07E-04    | 0.001176884 |
| Pden_1716 |             | amino acid/amide ABC transporter ATP-binding protein 1, HAAT family                               | -3.33 | 2.48E-05    | 6.90E-04    |
| Pden_1717 |             | amino acid/amide ABC transporter substrate-binding protein, HAAT family                           | -3.16 | 3.47E-05    | 7.44E-04    |
| Pden_1718 |             | transcriptional regulator, LysR family                                                            | -1.56 | 2.02E-04    | 0.001645714 |
| Pden_1719 |             | AMP-dependent synthetase and ligase                                                               | -2.67 | 6.47E-06    | 6.87E-04    |
| Pden_1721 |             | transporter, UIT1 family                                                                          | -1.92 | 3.71E-04    | 0.002309828 |
| Pden_1725 |             | hypothetical protein                                                                              | -2.14 | 2.25E-04    | 0.001721674 |
| Pden_1727 |             | conserved hypothetical protein                                                                    | -2.25 | 2.87E-04    | 0.002014555 |
| Pden_1734 |             | protein of unknown function DUF451                                                                | -2.77 | 5.29E-06    | 6.87E-04    |
| Pden_1735 | <i>efeB</i> | Dyp-type peroxidase family                                                                        | -3.50 | 1.82E-06    | 6.87E-04    |
| Pden_1736 | <i>efeO</i> | protein of unknown function DUF451                                                                | -5.52 | 1.62E-06    | 6.87E-04    |
| Pden_1741 |             | conserved hypothetical protein                                                                    | 2.39  | 8.61E-04    | 0.003825716 |
| Pden_1742 | <i>dtl</i>  | D-tyrosyl-HRNA(Tyr) deacylase                                                                     | 2.29  | 3.32E-04    | 0.002212274 |
| Pden_1744 | <i>tdk</i>  | thymidine kinase                                                                                  | 2.28  | 1.96E-04    | 0.001631407 |
| Pden_1747 |             | ABC transporter related protein                                                                   | 2.15  | 4.47E-04    | 0.002574525 |
| Pden_1753 |             | conserved hypothetical protein                                                                    | -1.70 | 0.001402322 | 0.005267032 |
| Pden_1754 |             | short-chain dehydrogenase/reductase SDR                                                           | 1.42  | 9.58E-04    | 0.004097585 |
| Pden_1757 |             | Serine-type D-Ala-D-Ala carboxypeptidase                                                          | -1.82 | 2.01E-04    | 0.0016447   |
| Pden_1761 |             | protein of unknown function DUF6, transmembrane                                                   | 1.87  | 1.02E-04    | 0.00115165  |
| Pden_1774 |             | periplasmic binding protein                                                                       | -1.58 | 0.00278277  | 0.008507948 |
| Pden_1778 |             | drug resistance transporter, Bcr/CflA subfamily                                                   | 1.08  | 0.00235753  | 0.007265479 |
| Pden_1780 |             | efflux transporter, RND family, MFP subunit                                                       | -1.86 | 7.89E-05    | 0.001019694 |
| Pden_1781 |             | transporter, hydrophobe/amphiphile efflux-1 (HAE1) family                                         | -1.74 | 8.72E-05    | 0.001065159 |
| Pden_1783 |             | signal transduction histidine kinase, glucose-6-phosphate specific                                | -2.15 | 4.51E-04    | 0.00259101  |
| Pden_1784 |             | two component transcriptional regulator, LuxR family                                              | -2.47 | 5.61E-05    | 9.01E-04    |
| Pden_1785 |             | helix-turn-helix domain protein                                                                   | -1.91 | 0.001365353 | 0.005166504 |
| Pden_1791 | <i>maf</i>  | maf protein                                                                                       | 1.15  | 8.89E-04    | 0.00389767  |
| Pden_1792 |             | ribonuclease                                                                                      | 2.14  | 2.05E-05    | 6.87E-04    |
| Pden_1793 | <i>yacG</i> | protein of unknown function DUF329                                                                | 2.53  | 3.08E-05    | 7.09E-04    |
| Pden_1795 |             | Allergen V5/Tpx-1 family protein                                                                  | -1.66 | 3.75E-04    | 0.002309828 |
| Pden_1798 |             | sulfate ABC transporter, periplasmic sulfate-binding protein                                      | -1.36 | 0.002309806 | 0.007415694 |
| Pden_1807 |             | extracellular solute-binding protein, family 5                                                    | -1.83 | 5.90E-04    | 0.003052963 |
| Pden_1810 |             | conserved hypothetical protein                                                                    | 1.86  | 0.003048021 | 0.009099135 |
| Pden_1811 |             | 5'-Nucleotidase domain protein                                                                    | 1.55  | 0.001003093 | 0.004221661 |
| Pden_1814 |             | Patatin                                                                                           | 3.93  | 7.08E-05    | 9.77E-04    |
| Pden_1815 | <i>prtB</i> | bacterial peptide chain release factor 2 (bRF-2)                                                  | 1.69  | 1.07E-04    | 0.001177715 |
| Pden_1818 |             | aminotransferase                                                                                  | 1.27  | 0.002871511 | 0.008705666 |
| Pden_1823 |             | peptidase M20                                                                                     | -1.97 | 5.03E-04    | 0.002762958 |
| Pden_1830 |             | Sterol-binding domain protein                                                                     | -1.63 | 0.001241705 | 0.004844257 |
| Pden_1831 |             | alpha/beta hydrolase fold protein                                                                 | -1.40 | 0.002889802 | 0.008745409 |
| Pden_1832 |             | oligoendopeptidase, pepF/M3 family                                                                | -1.15 | 0.003346613 | 0.00974908  |
| Pden_1834 |             | Glutathione S-transferase, C-terminal domain                                                      | -2.73 | 7.42E-04    | 0.003490386 |
| Pden_1838 |             | phosphoesterase, PA-phosphatase related protein                                                   | 2.42  | 0.003369582 | 0.009799076 |
| Pden_1839 | <i>iolD</i> | ABC transporter related protein                                                                   | 1.88  | 0.001106291 | 0.004479442 |
| Pden_1840 |             | lipoprotein releasing system, transmembrane protein, LolC/E family                                | 1.25  | 0.003182421 | 0.0093951   |
| Pden_1845 | <i>ccoP</i> | cytochrome c oxidase, cbb3-type, subunit III                                                      | -1.98 | 7.83E-04    | 0.003626579 |
| Pden_1846 |             | Cbb3-type cytochrome oxidase component                                                            | -1.99 | 0.001179375 | 0.004668627 |
| Pden_1847 | <i>ccoO</i> | cytochrome c oxidase, cbb3-type, subunit II                                                       | -1.59 | 0.002570443 | 0.00802847  |
| Pden_1856 |             | histidine triad (HIT) protein                                                                     | -1.95 | 3.12E-04    | 0.002120675 |
| Pden_1860 | <i>plsX</i> | phosphate:acyl-[acyl carrier protein] acyltransferase                                             | 1.72  | 6.59E-04    | 0.003246886 |
| Pden_1861 | <i>fabH</i> | 3-oxoacyl-[acyl-carrier-protein] synthase III                                                     | 2.45  | 1.58E-04    | 0.00147988  |
| Pden_1862 |             | transcriptional regulator, TraR/DksA family                                                       | 1.80  | 8.89E-04    | 0.00389767  |
| Pden_1863 | <i>ihfA</i> | integration host factor, alpha subunit                                                            | -1.64 | 2.15E-04    | 0.001694513 |
| Pden_1879 | <i>carB</i> | carbamoyl-phosphate synthase large subunit                                                        | 2.10  | 8.29E-05    | 0.00104193  |
| Pden_1884 | <i>hisH</i> | imidazole glycerol phosphate synthase subunit hisH                                                | 1.39  | 0.00105658  | 0.004364031 |
| Pden_1885 |             | conserved hypothetical protein                                                                    | -3.07 | 0.001611899 | 0.005813604 |
| Pden_1886 | <i>hisA</i> | 1-(5-phosphoribosyl)-5-((5-phosphoribosylamino)methylideneamino)imidazole-4-carboxamide isomerase | 2.01  | 0.003118551 | 0.009239266 |
| Pden_1889 |             | MgtC/SapB transporter                                                                             | 1.36  | 0.002011227 | 0.006788563 |
| Pden_1898 | <i>betI</i> | transcriptional regulator, TetR family                                                            | 1.58  | 6.41E-04    | 0.003194596 |

|           |             |                                                                       |       |             |             |
|-----------|-------------|-----------------------------------------------------------------------|-------|-------------|-------------|
| Pden_1899 | <i>choX</i> | Substrate-binding region of ABC-type glycine betaine transport system | -1.93 | 3.99E-04    | 0.002394246 |
| Pden_1900 | <i>choW</i> | binding-protein-dependent transport systems inner membrane component  | -2.59 | 1.36E-04    | 0.001338383 |
| Pden_1901 | <i>choV</i> | ABC transporter related protein                                       | -2.73 | 2.82E-05    | 7.03E-04    |
| Pden_1903 |             | Lysine exporter protein (LYSE/YGGA)                                   | 3.44  | 4.21E-04    | 0.002481719 |
| Pden_1919 |             | hypothetical protein                                                  | 2.05  | 0.001430053 | 0.005343439 |
| Pden_1920 |             | fructose-bisphosphate aldolase                                        | -1.62 | 1.73E-04    | 0.001509649 |
| Pden_1922 |             | hypothetical protein                                                  | 2.34  | 2.07E-05    | 6.87E-04    |
| Pden_1923 |             | ATP phosphoribosyltransferase catalytic subunit                       | 2.58  | 3.40E-04    | 0.002230025 |
| Pden_1924 |             | ATP phosphoribosyltransferase regulatory subunit                      | 2.13  | 1.05E-04    | 0.001166968 |
| Pden_1925 | <i>hisS</i> | histidyl-tRNA synthetase                                              | 1.46  | 9.30E-04    | 0.004030546 |
| Pden_1933 |             | O-acetylhomoserine sulfhydrylase                                      | -2.50 | 7.65E-05    | 0.001002704 |
| Pden_1934 |             | translation initiation factor 2, gamma subunit, GTPase                | 4.04  | 2.24E-04    | 0.00171547  |
| Pden_1937 |             | cytochrome c, class I                                                 | -2.86 | 4.13E-04    | 0.002451367 |
| Pden_1938 | <i>ctaD</i> | Cytochrome-c oxidase                                                  | -2.66 | 0.001533422 | 0.005621808 |
| Pden_1939 |             | conserved hypothetical protein                                        | -1.20 | 0.001840961 | 0.006366658 |
| Pden_1940 |             | FAD dependent oxidoreductase                                          | 1.15  | 0.002219728 | 0.007231971 |
| Pden_1941 |             | Glyoxylate reductase                                                  | -1.47 | 4.19E-04    | 0.002476529 |
| Pden_1945 | <i>moeB</i> | UBA/THIF-type NAD/FAD binding protein                                 | 2.99  | 1.77E-04    | 0.001524591 |
| Pden_1946 | <i>dut</i>  | deoxyuridine 5'-triphosphate nucleotidohydrolase                      | 1.10  | 0.001448421 | 0.005395971 |
| Pden_1948 |             | conserved hypothetical protein                                        | -1.21 | 0.002259698 | 0.00731094  |
| Pden_1949 |             | putative L-sorbose dehydrogenase                                      | -1.63 | 3.64E-04    | 0.002303161 |
| Pden_1953 |             | conserved hypothetical protein                                        | 2.92  | 8.52E-04    | 0.003818535 |
| Pden_1954 |             | SAM-dependent methyltransferase                                       | 2.31  | 1.99E-04    | 0.001641009 |
| Pden_1955 | <i>edd</i>  | 6-phosphogluconate dehydratase                                        | 2.31  | 0.001862483 | 0.00642561  |
| Pden_1956 |             | putative PAS/PAC sensor protein                                       | 2.92  | 1.83E-05    | 6.87E-04    |
| Pden_1962 |             | hypothetical protein                                                  | 3.98  | 0.001388292 | 0.005229852 |
| Pden_1973 |             | hypothetical protein                                                  | 1.95  | 2.74E-04    | 0.001979409 |
| Pden_1974 |             | Mu-like prophage major head subunit gpT                               | 7.10  | 0.001989825 | 0.006743296 |
| Pden_1975 |             | hypothetical protein                                                  | 4.80  | 2.71E-06    | 6.87E-04    |
| Pden_1984 | <i>ilvD</i> | dihydroxyacid dehydratase                                             | -1.46 | 9.67E-04    | 0.00411907  |
| Pden_1985 |             | pterin-4-alpha-carbinolamine dehydratase                              | -2.38 | 1.02E-04    | 0.00115165  |
| Pden_1986 | <i>cls</i>  | cardiolipin synthetase 2                                              | -1.95 | 5.79E-05    | 9.13E-04    |
| Pden_1991 |             | aldehyde dehydrogenase                                                | -1.67 | 2.75E-04    | 0.001980264 |
| Pden_1993 |             | hypothetical protein                                                  | 4.03  | 5.58E-05    | 9.01E-04    |
| Pden_1994 |             | hypothetical protein                                                  | 1.60  | 9.72E-04    | 0.004133467 |
| Pden_2001 |             | protein of unknown function DUF55                                     | -1.40 | 6.27E-04    | 0.003151095 |
| Pden_2004 | <i>lysM</i> | Peptidoglycan-binding LysM                                            | -2.43 | 5.20E-04    | 0.002814686 |
| Pden_2005 |             | AMP-dependent synthetase and ligase                                   | -2.94 | 1.46E-05    | 6.87E-04    |
| Pden_2013 |             | ABC-2 type transporter                                                | -1.40 | 3.93E-04    | 0.002373286 |
| Pden_2020 | <i>lysA</i> | diaminopimelate decarboxylase                                         | 1.05  | 0.001278181 | 0.004938294 |
| Pden_2025 |             | diguanylate phosphodiesterase                                         | 1.23  | 0.001141337 | 0.004578915 |
| Pden_2026 |             | acetyl-CoA acetyltransferase                                          | -2.78 | 5.36E-05    | 9.01E-04    |
| Pden_2027 |             | 3-oxoacyl-[acyl-carrier-protein] reductase                            | -3.70 | 8.04E-04    | 0.003682344 |
| Pden_2028 |             | protein of unknown function DUF465                                    | -4.80 | 0.001626662 | 0.005840986 |
| Pden_2034 |             | toluene tolerance family protein                                      | -2.59 | 1.36E-05    | 6.87E-04    |
| Pden_2039 | <i>argF</i> | ornithine carbamoyltransferase                                        | -1.30 | 8.73E-04    | 0.003853738 |
| Pden_2040 |             | GCN5-related N-acetyltransferase                                      | 2.18  | 1.61E-04    | 0.001492398 |
| Pden_2041 | <i>argD</i> | acetylornithine aminotransferase apoenzyme                            | 1.96  | 6.26E-05    | 9.34E-04    |
| Pden_2046 |             | TonB-dependent receptor                                               | -1.82 | 1.35E-04    | 0.001332887 |
| Pden_2047 | <i>rocF</i> | arginase                                                              | -2.53 | 2.60E-05    | 7.00E-04    |
| Pden_2052 |             | hypothetical protein                                                  | -2.37 | 3.73E-04    | 0.002309828 |
| Pden_2053 |             | hypothetical protein                                                  | -2.16 | 7.70E-05    | 0.001002704 |
| Pden_2056 |             | hypothetical protein                                                  | 2.06  | 5.32E-04    | 0.002866564 |
| Pden_2063 |             | conserved hypothetical phage terminase large subunit                  | 2.78  | 6.22E-04    | 0.003147257 |
| Pden_2064 |             | phage terminase, small subunit, putative, P27 family                  | 3.23  | 6.96E-05    | 9.69E-04    |
| Pden_2068 |             | ParB domain protein nuclease                                          | 3.64  | 8.34E-06    | 6.87E-04    |
| Pden_2072 |             | hypothetical protein                                                  | 3.21  | 8.73E-05    | 0.001065159 |
| Pden_2076 |             | RNA polymerase, sigma-24 subunit, ECF subfamily                       | 1.95  | 0.003126823 | 0.009257955 |
| Pden_2078 |             | hypothetical protein                                                  | -2.77 | 4.22E-04    | 0.002481719 |
| Pden_2082 |             | conserved hypothetical protein                                        | 2.08  | 0.001950467 | 0.00664103  |
| Pden_2085 |             | conserved hypothetical protein                                        | -1.65 | 0.003406586 | 0.009867016 |
| Pden_2087 |             | conserved hypothetical protein                                        | -1.45 | 6.76E-04    | 0.003305876 |
| Pden_2088 |             | endonuclease                                                          | -2.40 | 7.56E-04    | 0.0035394   |
| Pden_2089 |             | conserved hypothetical protein                                        | -1.89 | 2.31E-04    | 0.001743752 |
| Pden_2090 |             | conserved hypothetical protein                                        | -2.39 | 0.001277162 | 0.004938294 |
| Pden_2098 |             | alkane 1-monoxygenase                                                 | 1.46  | 7.84E-04    | 0.003626579 |
| Pden_2101 |             | DNA methylase N-4/N-6 domain protein                                  | -2.02 | 2.09E-04    | 0.001676926 |
| Pden_2125 |             | ABC-2 type transporter                                                | 1.48  | 0.003015167 | 0.009033013 |
| Pden_2127 |             | ABC transporter related protein                                       | 1.67  | 0.001241921 | 0.004844257 |
| Pden_2130 |             | Nitrilase/cyanide hydratase and apolipoprotein N-acyltransferase      | 2.03  | 0.001603336 | 0.005802495 |
| Pden_2131 |             | GCN5-related N-acetyltransferase                                      | 2.56  | 1.35E-04    | 0.001332887 |
| Pden_2143 |             | Serine-type D-Ala-D-Ala carboxypeptidase                              | -1.59 | 3.67E-04    | 0.002309564 |
| Pden_2149 |             | binding-protein-dependent transport systems inner membrane component  | -2.58 | 2.80E-04    | 0.001999931 |
| Pden_2150 |             | binding-protein-dependent transport systems inner membrane component  | -2.55 | 2.91E-04    | 0.002029518 |
| Pden_2151 |             | polyamine ABC transporter, periplasmic polyamine-binding protein      | -2.19 | 0.00188353  | 0.006469312 |
| Pden_2152 |             | extracellular solute-binding protein, family 1                        | -2.59 | 6.46E-04    | 0.003213642 |
| Pden_2164 |             | GatB/Yqey domain protein                                              | 1.18  | 9.93E-04    | 0.004204018 |
| Pden_2166 |             | General secretory system II, protein E domain protein                 | 2.91  | 6.16E-05    | 9.33E-04    |
| Pden_2172 |             | peptidase M48, Ste24p                                                 | -1.56 | 2.86E-04    | 0.002014555 |
| Pden_2173 |             | conserved hypothetical protein                                        | -1.89 | 1.22E-04    | 0.00126941  |
| Pden_2182 |             | conserved hypothetical protein                                        | 1.54  | 7.64E-04    | 0.003564054 |
| Pden_2189 | <i>cobS</i> | cobalochelatase CobS subunit                                          | -1.40 | 0.001573969 | 0.005733096 |
| Pden_2190 |             | hypothetical protein                                                  | -1.00 | 0.002184219 | 0.007167014 |
| Pden_2193 |             | peptidase M24                                                         | -1.31 | 3.36E-04    | 0.002227917 |
| Pden_2199 |             | conserved hypothetical protein                                        | -1.94 | 8.57E-04    | 0.003825716 |
| Pden_2204 |             | conserved hypothetical protein                                        | -1.73 | 8.98E-05    | 0.001079381 |
| Pden_2219 | <i>upp</i>  | uracil phosphoribosyltransferase                                      | -1.02 | 0.003090137 | 0.009203155 |

|           |                    |                                                                                            |       |             |             |
|-----------|--------------------|--------------------------------------------------------------------------------------------|-------|-------------|-------------|
| Pden_2224 |                    | Malate dehydrogenase (oxaloacetate-decarboxylating) (NADP(+)), Phosphate acetyltransferase | -2.11 | 1.59E-04    | 0.001488419 |
| Pden_2225 |                    | propionyl-CoA synthetase                                                                   | -3.05 | 5.73E-05    | 9.13E-04    |
| Pden_2226 | <i>aroA</i>        | 3-phosphoshikimate 1-carboxyvinyltransferase                                               | 1.47  | 0.001167673 | 0.004646598 |
| Pden_2247 | <i>nuoD (nqo4)</i> | NADH dehydrogenase subunit D                                                               | -1.13 | 0.002132296 | 0.00705609  |
| Pden_2248 | <i>nuoC</i>        | NADH dehydrogenase subunit C                                                               | -1.25 | 6.35E-04    | 0.0031761   |
| Pden_2249 | <i>nuoB (nqo6)</i> | NADH dehydrogenase subunit B                                                               | -1.05 | 0.001830636 | 0.00634395  |
| Pden_2253 |                    | glutathione-dependent formaldehyde-activating, GFA                                         | -2.21 | 8.59E-05    | 0.001060694 |
| Pden_2255 |                    | conserved hypothetical protein                                                             | -2.30 | 2.13E-05    | 6.88E-04    |
| Pden_2257 |                    | succinate semialdehyde dehydrogenase                                                       | -3.27 | 1.04E-05    | 6.87E-04    |
| Pden_2262 | <i>pheT</i>        | phenylalanyl-tRNA synthetase beta subunit                                                  | 1.38  | 8.35E-04    | 0.003775583 |
| Pden_2265 | <i>mscL</i>        | large conductance mechanosensitive channel protein                                         | -3.22 | 0.003307025 | 0.009695118 |
| Pden_2272 |                    | cytochrome P450                                                                            | 3.42  | 2.42E-05    | 6.88E-04    |
| Pden_2275 |                    | hypothetical protein                                                                       | 1.09  | 0.003333896 | 0.009734438 |
| Pden_2276 | <i>pyk</i>         | pyruvate kinase                                                                            | 1.37  | 6.55E-04    | 0.003235458 |
| Pden_2278 |                    | hypothetical protein                                                                       | -1.78 | 1.60E-04    | 0.001489115 |
| Pden_2280 |                    | hypothetical protein                                                                       | -1.46 | 4.40E-04    | 0.00254936  |
| Pden_2281 |                    | Arc domain protein DNA binding domain protein                                              | -2.45 | 0.001428881 | 0.005343002 |
| Pden_2285 | <i>choX</i>        | Substrate-binding region of ABC-type glycine betaine transport system                      | -3.69 | 6.47E-05    | 9.41E-04    |
| Pden_2286 | <i>betC</i>        | sulfatase                                                                                  | -1.58 | 1.49E-04    | 0.001431346 |
| Pden_2287 |                    | membrane protein of unknown function UCP014873                                             | 1.60  | 0.002009075 | 0.006788563 |
| Pden_2291 |                    | protein of unknown function DUF6, transmembrane                                            | 1.27  | 0.002463045 | 0.007779412 |
| Pden_2292 |                    | conserved hypothetical protein                                                             | 1.73  | 0.001103082 | 0.004476884 |
| Pden_2293 |                    | glycosyl transferase, family 14                                                            | 3.47  | 4.23E-06    | 6.87E-04    |
| Pden_2294 |                    | conserved hypothetical protein                                                             | 1.98  | 1.08E-04    | 0.00118008  |
| Pden_2297 |                    | UDP-glucose pyrophosphorylase                                                              | -2.09 | 8.12E-05    | 0.00102897  |
| Pden_2302 | <i>dnaK</i>        | chaperone protein DnaK                                                                     | -2.09 | 0.00205743  | 0.006885889 |
| Pden_2313 |                    | conserved hypothetical protein                                                             | -2.14 | 0.003336044 | 0.009735094 |
| Pden_2314 |                    | conserved hypothetical protein                                                             | -1.85 | 1.92E-04    | 0.001609815 |
| Pden_2327 |                    | protein of unknown function DUF1428                                                        | -2.86 | 5.16E-04    | 0.002802086 |
| Pden_2328 |                    | Glyoxalase/bleomycin resistance protein/dioxygenase                                        | -2.38 | 4.07E-05    | 8.15E-04    |
| Pden_2332 |                    | cobalamin (vitamin B12) biosynthesis CbiX protein                                          | -1.66 | 5.85E-04    | 0.003035437 |
| Pden_2333 |                    | conserved hypothetical protein                                                             | -2.21 | 7.89E-04    | 0.003638028 |
| Pden_2338 |                    | 4-aminobutyrate aminotransferase apoenzyme                                                 | -3.58 | 3.32E-05    | 7.22E-04    |
| Pden_2349 |                    | short-chain dehydrogenase/reductase SDR                                                    | -1.87 | 3.15E-04    | 0.002139228 |
| Pden_2351 |                    | conserved hypothetical protein                                                             | -1.25 | 0.001140209 | 0.004578915 |
| Pden_2353 |                    | domain of unknown function DUF1745                                                         | -2.12 | 0.002381669 | 0.007583468 |
| Pden_2354 |                    | two component transcriptional regulator, LuxR family                                       | -3.04 | 3.36E-04    | 0.002227917 |
| Pden_2359 | <i>pqqE</i>        | coenzyme PQQ biosynthesis protein E                                                        | -1.81 | 0.00187867  | 0.006466844 |
| Pden_2360 | <i>pqqD</i>        | coenzyme PQQ synthesis D                                                                   | -2.22 | 1.71E-04    | 0.001509512 |
| Pden_2361 | <i>pqqC</i>        | coenzyme PQQ biosynthesis protein C                                                        | -2.06 | 2.16E-04    | 0.001694513 |
| Pden_2362 | <i>pqqB</i>        | coenzyme PQQ biosynthesis protein B                                                        | -2.40 | 3.41E-04    | 0.002237339 |
| Pden_2366 | <i>adh</i>         | Aldehyde dehydrogenase (NAD(+))                                                            | -5.40 | 4.86E-04    | 0.0027113   |
| Pden_2367 | <i>adhP</i>        | Alcohol dehydrogenase GroES domain protein                                                 | -4.03 | 8.70E-05    | 0.001065159 |
| Pden_2368 |                    | protein of unknown function DUF779                                                         | -4.01 | 6.80E-04    | 0.003306024 |
| Pden_2374 |                    | two component transcriptional regulator, winged helix family                               | -1.90 | 0.002277333 | 0.00735009  |
| Pden_2378 |                    | putative RNA methylase                                                                     | 1.30  | 6.79E-04    | 0.003306024 |
| Pden_2380 |                    | metallophosphoesterase                                                                     | 1.56  | 2.70E-04    | 0.001969565 |
| Pden_2386 |                    | 2,3-dihydroxybenzoate-AMP ligase                                                           | -2.19 | 1.53E-04    | 0.001451477 |
| Pden_2393 | <i>gndA</i>        | 6-phosphogluconate dehydrogenase (decarboxylating)                                         | 2.28  | 0.001594182 | 0.005776476 |
| Pden_2394 |                    | hypothetical protein                                                                       | 4.86  | 7.55E-06    | 6.87E-04    |
| Pden_2395 |                    | hypothetical protein                                                                       | 2.56  | 2.39E-05    | 6.88E-04    |
| Pden_2406 | <i>ddl</i>         | D-alanine-D-alanine ligase                                                                 | -3.91 | 1.85E-05    | 6.87E-04    |
| Pden_2410 |                    | conserved hypothetical protein                                                             | -1.29 | 0.001263209 | 0.004904621 |
| Pden_2412 |                    | type I secretion membrane fusion protein, HlyD family                                      | -1.14 | 0.002378318 | 0.00757799  |
| Pden_2413 |                    | ABC transporter related protein                                                            | -1.18 | 0.003088017 | 0.009202254 |
| Pden_2414 |                    | hypothetical protein                                                                       | -1.85 | 0.003422509 | 0.009890503 |
| Pden_2417 | <i>tnpB</i>        | IS66 Orf2 family protein                                                                   | 2.73  | 3.70E-04    | 0.002309828 |
| Pden_2419 |                    | phage integrase family protein                                                             | -4.07 | 9.99E-04    | 0.004214886 |
| Pden_2423 |                    | hypothetical protein                                                                       | 2.34  | 4.65E-05    | 8.76E-04    |
| Pden_2428 |                    | hypothetical protein                                                                       | 2.93  | 1.75E-04    | 0.001512937 |
| Pden_2436 |                    | hypothetical protein                                                                       | -2.63 | 0.002658519 | 0.008227434 |
| Pden_2437 |                    | hypothetical protein                                                                       | -1.65 | 9.34E-04    | 0.004038014 |
| Pden_2443 | <i>tssB</i>        | Uncharacterized conserved protein UCP028301                                                | -3.42 | 6.51E-05    | 9.41E-04    |
| Pden_2444 | <i>tssC</i>        | protein of unknown function DUF877                                                         | -3.91 | 5.38E-05    | 9.01E-04    |
| Pden_2445 |                    | protein of unknown function DUF796                                                         | -3.23 | 9.91E-04    | 0.004196995 |
| Pden_2450 | <i>tssJ</i>        | conserved hypothetical protein                                                             | -4.03 | 4.97E-04    | 0.002744854 |
| Pden_2451 | <i>tssK</i>        | protein of unknown function DUF876                                                         | -3.03 | 0.002113209 | 0.007015853 |
| Pden_2457 |                    | conserved hypothetical protein                                                             | 1.21  | 0.003031062 | 0.009075263 |
| Pden_2459 |                    | OmpA/MotB domain protein                                                                   | -2.25 | 0.00141898  | 0.005313828 |
| Pden_2462 |                    | peptidase C14, caspase catalytic subunit p20                                               | 1.67  | 0.001962766 | 0.006668949 |
| Pden_2465 |                    | Hemolysin-type calcium-binding region                                                      | 1.58  | 5.95E-04    | 0.003066191 |
| Pden_2468 |                    | cation diffusion facilitator family transporter                                            | 2.51  | 5.70E-04    | 0.002982562 |
| Pden_2469 |                    | carbohydrate ABC transporter ATP-binding protein, CUT1 family                              | -2.78 | 1.69E-05    | 6.87E-04    |
| Pden_2470 |                    | carbohydrate ABC transporter membrane protein 2, CUT1 family                               | -3.69 | 9.66E-05    | 0.001123928 |
| Pden_2471 |                    | carbohydrate ABC transporter membrane protein 1, CUT1 family                               | -4.12 | 1.62E-05    | 6.87E-04    |
| Pden_2472 |                    | carbohydrate ABC transporter substrate-binding protein, CUT1 family                        | -3.32 | 1.09E-05    | 6.87E-04    |
| Pden_2476 |                    | glutamine-fructose-6-phosphate transaminase                                                | -1.80 | 0.003207439 | 0.00945793  |
| Pden_2479 |                    | hypothetical protein                                                                       | -1.55 | 0.001878872 | 0.006466844 |
| Pden_2480 |                    | cytochrome c oxidase, subunit III                                                          | -1.72 | 9.13E-04    | 0.003980302 |
| Pden_2483 |                    | nitric oxide reductase, NorB subunit apoprotein                                            | -4.22 | 7.55E-07    | 6.87E-04    |
| Pden_2484 |                    | nitric oxide reductase, NorC subunit apoprotein                                            | -4.00 | 5.39E-05    | 9.01E-04    |
| Pden_2486 | <i>nirI</i>        | FMN-binding domain protein                                                                 | 3.42  | 5.72E-04    | 0.002990456 |
| Pden_2497 | <i>katG</i>        | catalase/oxidase HPI                                                                       | -2.91 | 2.10E-04    | 0.001676926 |
| Pden_2502 |                    | protein of unknown function DUF81                                                          | 2.92  | 1.27E-04    | 0.001290694 |
| Pden_2506 | <i>gpml</i>        | phosphoglycerate mutase                                                                    | 1.31  | 9.05E-04    | 0.003955843 |
| Pden_2507 |                    | peptidase M23B                                                                             | 1.50  | 0.002446791 | 0.007737728 |
| Pden_2508 |                    | carboxyl-terminal protease                                                                 | -1.14 | 0.001085567 | 0.004436017 |



|           |             |                                                               |       |             |             |
|-----------|-------------|---------------------------------------------------------------|-------|-------------|-------------|
| Pden_2510 |             | lytic murein transglycosylase                                 | -2.03 | 0.001109926 | 0.004488461 |
| Pden_2512 |             | YbaK/prolyl-HRNA synthetase associated region                 | -1.71 | 0.001082248 | 0.004432197 |
| Pden_2518 | <i>rsfS</i> | iojap-like protein                                            | -1.67 | 0.001055549 | 0.004364031 |
| Pden_2524 |             | conserved hypothetical protein                                | -2.31 | 5.75E-05    | 9.13E-04    |
| Pden_2525 |             | cobalt transporter, subunit CbtA                              | -1.86 | 1.78E-04    | 0.001530905 |
| Pden_2526 |             | conserved hypothetical protein                                | -1.33 | 0.002443814 | 0.007733144 |
| Pden_2528 |             | conserved hypothetical protein                                | -2.56 | 2.18E-04    | 0.001706774 |
| Pden_2529 | <i>cobO</i> | cob(I)yrinic acid a,c-diamide adenosyltransferase             | -1.86 | 1.22E-04    | 0.001269567 |
| Pden_2537 |             | precorrin-6A reductase                                        | -2.04 | 6.48E-04    | 0.003219899 |
| Pden_2544 |             | cytochrome c, class II                                        | -2.18 | 2.00E-04    | 0.001641009 |
| Pden_2547 |             | short-chain dehydrogenase/reductase SDR                       | 2.57  | 1.31E-04    | 0.001314735 |
| Pden_2550 |             | electron transfer flavoprotein beta-subunit                   | -1.43 | 0.001626141 | 0.005840986 |
| Pden_2560 |             | Enoyl-CoA hydratase/isomerase                                 | -1.27 | 9.88E-04    | 0.004188746 |
| Pden_2565 |             | putative esterase                                             | -1.41 | 0.001726481 | 0.006069778 |
| Pden_2566 |             | hypothetical protein                                          | -3.52 | 7.12E-05    | 9.80E-04    |
| Pden_2572 | <i>rpe</i>  | ribulose-5-phosphate 3-epimerase                              | -1.05 | 0.003047267 | 0.009099135 |
| Pden_2578 |             | conserved hypothetical protein                                | -1.50 | 3.64E-04    | 0.002303161 |
| Pden_2591 | <i>rimP</i> | protein of unknown function DUF150                            | 2.34  | 1.96E-05    | 6.87E-04    |
| Pden_2594 | <i>infB</i> | bacterial translation initiation factor 2 (bIF-2)             | 1.37  | 7.85E-04    | 0.003626579 |
| Pden_2596 | <i>mutT</i> | mutator MutT protein                                          | -1.14 | 0.001995376 | 0.006753066 |
| Pden_2598 |             | PpiC-type peptidyl-prolyl cis-trans isomerase                 | -1.64 | 1.08E-04    | 0.001177715 |
| Pden_2602 | <i>ilvE</i> | branched chain amino acid aminotransferase apoenzyme          | -2.04 | 1.95E-04    | 0.001628537 |
| Pden_2604 | <i>raiA</i> | SSU ribosomal protein S30P / sigma 54 modulation protein      | -2.88 | 0.002555576 | 0.008001781 |
| Pden_2610 |             | TonB-dependent receptor                                       | -4.52 | 1.54E-04    | 0.001458681 |
| Pden_2626 |             | type III secretion exporter                                   | 1.33  | 0.0018847   | 0.006469312 |
| Pden_2627 |             | flagellar biosynthetic protein FlIR                           | 1.65  | 0.002171816 | 0.007144838 |
| Pden_2629 |             | hypothetical protein                                          | 3.59  | 6.77E-04    | 0.003306024 |
| Pden_2630 |             | flagellar motor protein                                       | 2.76  | 3.73E-04    | 0.002309828 |
| Pden_2643 |             | hypothetical protein                                          | -4.09 | 6.12E-05    | 9.31E-04    |
| Pden_2644 |             | phage integrase family protein                                | -4.67 | 3.20E-04    | 0.002159975 |
| Pden_2649 | <i>flfF</i> | flagellar M-ring protein FlfF                                 | 1.79  | 5.56E-04    | 0.002936497 |
| Pden_2659 | <i>mepA</i> | murein endopeptidase, Metallo peptidase, MEROPS family M74    | -1.31 | 0.001259646 | 0.004894542 |
| Pden_2663 |             | acetyl-CoA acetyltransferase                                  | -3.67 | 1.68E-06    | 6.87E-04    |
| Pden_2664 |             | putative transcriptional regulator, ModE family               | -2.35 | 1.09E-04    | 0.001182514 |
| Pden_2678 |             | protein of unknown function DUF490                            | -1.61 | 0.001562613 | 0.005704043 |
| Pden_2679 |             | surface antigen (D15)                                         | -1.18 | 0.001241864 | 0.004844257 |
| Pden_2680 |             | glucokinase                                                   | 3.45  | 1.32E-05    | 6.87E-04    |
| Pden_2681 |             | hypothetical protein                                          | 2.16  | 4.97E-04    | 0.002744854 |
| Pden_2684 |             | conserved hypothetical protein                                | -4.25 | 8.04E-04    | 0.003682344 |
| Pden_2688 |             | inositol monophosphatase                                      | 1.36  | 0.001318598 | 0.005034736 |
| Pden_2699 | <i>flgI</i> | flagellar P-ring protein                                      | -1.60 | 0.00260659  | 0.008101389 |
| Pden_2703 |             | transposase, IS4 family                                       | 1.51  | 7.16E-04    | 0.003403276 |
| Pden_2704 |             | transposase-like protein                                      | 1.45  | 0.001011269 | 0.004248664 |
| Pden_2709 |             | saccharopine dehydrogenase (NAD+, L-lysine-forming)           | -1.83 | 8.92E-05    | 0.001075115 |
| Pden_2711 |             | conserved hypothetical protein                                | -1.56 | 4.37E-04    | 0.0025457   |
| Pden_2718 | <i>purH</i> | IMP cyclohydrolase                                            | 1.28  | 0.002701697 | 0.008311152 |
| Pden_2732 |             | protein of unknown function DUF81                             | -1.80 | 1.04E-04    | 0.001161644 |
| Pden_2733 |             | conserved hypothetical protein                                | -1.66 | 7.94E-04    | 0.003647678 |
| Pden_2735 |             | glycerophosphoryl diester phosphodiesterase                   | -1.67 | 2.81E-04    | 0.002001287 |
| Pden_2741 |             | hypothetical protein                                          | 2.84  | 0.001754427 | 0.006137651 |
| Pden_2743 | <i>efp</i>  | translation elongation factor P (EF-P)                        | 2.35  | 4.13E-04    | 0.002453976 |
| Pden_2745 |             | multiple monosaccharide-binding protein                       | -4.82 | 0.002557977 | 0.008004349 |
| Pden_2746 |             | multiple monosaccharide ABC transporter ATP-binding protein   | -4.25 | 0.002448629 | 0.007738707 |
| Pden_2747 |             | multiple monosaccharide ABC transporter membrane protein      | -3.87 | 0.001614671 | 0.005818563 |
| Pden_2754 |             | short-chain dehydrogenase/reductase SDR                       | -1.20 | 0.002108383 | 0.007005405 |
| Pden_2755 |             | aldehyde dehydrogenase                                        | -1.90 | 1.91E-04    | 0.001609111 |
| Pden_2761 |             | type I secretion target repeat protein                        | 2.51  | 6.31E-04    | 0.003164466 |
| Pden_2763 |             | outer membrane porin                                          | -2.16 | 7.42E-04    | 0.003490386 |
| Pden_2768 |             | HI0933 family protein                                         | 3.35  | 0.002569863 | 0.00802847  |
| Pden_2770 |             | major facilitator superfamily MFS_1                           | -1.52 | 4.91E-04    | 0.002726957 |
| Pden_2781 |             | two component transcriptional regulator, Fis family           | -1.82 | 1.01E-04    | 0.001137092 |
| Pden_2782 |             | histone family protein nucleoid-structuring protein H-NS      | -3.77 | 0.003403129 | 0.009867016 |
| Pden_2793 | <i>trxA</i> | thioredoxin                                                   | -1.70 | 1.80E-04    | 0.001538995 |
| Pden_2800 |             | conserved hypothetical protein                                | 1.27  | 7.17E-04    | 0.003406925 |
| Pden_2801 | <i>truB</i> | tRNA pseudouridine synthase B                                 | 1.91  | 9.67E-04    | 0.00411907  |
| Pden_2802 |             | conserved hypothetical protein                                | -2.06 | 0.001299508 | 0.004984399 |
| Pden_2803 |             | beta-lactamase domain protein                                 | -3.33 | 1.79E-04    | 0.001533089 |
| Pden_2811 |             | UDP-sulfoquinovose synthase                                   | -1.60 | 9.77E-04    | 0.004148874 |
| Pden_2819 |             | signal transduction histidine kinase                          | 1.36  | 9.51E-04    | 0.00407864  |
| Pden_2828 | <i>fdxH</i> | formate dehydrogenase (quinone-dependent) iron-sulfur subunit | -1.63 | 0.003227469 | 0.009483852 |
| Pden_2829 | <i>fdnG</i> | formate dehydrogenase (quinone-dependent) catalytic subunit   | -2.33 | 6.19E-04    | 0.003143078 |
| Pden_2830 |             | formate dehydrogenase (quinone-dependent) catalytic subunit   | -3.58 | 4.07E-05    | 8.15E-04    |
| Pden_2831 |             | ferredoxin                                                    | -1.37 | 0.002652684 | 0.008219791 |
| Pden_2832 |             | Rieske (2Fe-2S) domain protein                                | -1.65 | 0.00286165  | 0.007363138 |
| Pden_2835 | <i>recF</i> | DNA replication and repair protein RecF                       | 1.78  | 3.66E-04    | 0.002309564 |
| Pden_2842 | <i>dapE</i> | succinyldiaminopimelate desuccinylase                         | 1.51  | 0.001106811 | 0.004479442 |
| Pden_2843 |             | CN5-related N-acetyltransferase                               | 1.37  | 7.68E-04    | 0.003578439 |
| Pden_2847 |             | transcriptional regulator, TetR family                        | 2.61  | 1.06E-05    | 6.87E-04    |
| Pden_2849 |             | PTS system fructose subfamily IIA component                   | 1.74  | 0.001117876 | 0.004513404 |
| Pden_2852 | <i>pckA</i> | Phosphoenolpyruvate carboxykinase (ATP)                       | -5.26 | 2.35E-05    | 6.88E-04    |
| Pden_2856 | <i>fdhF</i> | formate dehydrogenase alpha subunit                           | -1.02 | 0.003412034 | 0.009872234 |
| Pden_2870 |             | acetyl-CoA acetyltransferase                                  | -2.91 | 0.002241761 | 0.007272039 |
| Pden_2871 |             | 3-hydroxyacyl-CoA dehydrogenase                               | -2.55 | 2.06E-04    | 0.001670021 |
| Pden_2872 |             | PlkB domain protein                                           | 1.91  | 0.001713644 | 0.006047193 |
| Pden_2878 | <i>atpE</i> | ATP synthase F0 subcomplex C subunit                          | 1.06  | 0.003104384 | 0.009239266 |
| Pden_2880 |             | conserved hypothetical protein                                | 1.87  | 0.002342698 | 0.007497521 |
| Pden_2881 |             | transcriptional regulator, ArsR family                        | 2.23  | 3.46E-04    | 0.002238614 |

|           |             |                                                                         |   |       |             |             |
|-----------|-------------|-------------------------------------------------------------------------|---|-------|-------------|-------------|
| Pden_2883 |             | protein of unknown function DUF952                                      |   | 1.86  | 0.001938934 | 0.006619569 |
| Pden_2886 |             | conserved hypothetical protein                                          | 3 | 2.85  | 6.40E-04    | 0.003193022 |
| Pden_2887 |             | putative phage host specificity protein                                 | 3 | 3.47  | 0.002264863 | 0.007322477 |
| Pden_2890 |             | conserved hypothetical protein                                          | 3 | 3.01  | 8.85E-04    | 0.003887375 |
| Pden_2896 |             | head-tail adaptor, putative                                             | 3 | 3.21  | 0.001708381 | 0.006035961 |
| Pden_2897 |             | conserved hypothetical protein                                          | 3 | 2.67  | 6.91E-04    | 0.003324257 |
| Pden_2898 |             | phage major capsid protein, HK97 family                                 | 3 | 1.86  | 5.98E-04    | 0.003074387 |
| Pden_2901 |             | phage portal protein, HK97 family                                       | 3 | 5.72  | 8.87E-06    | 6.87E-04    |
| Pden_2902 |             | protein of unknown function DUF264                                      |   | 5.34  | 7.85E-04    | 0.003626579 |
| Pden_2906 |             | acyl-CoA dehydrogenase domain protein                                   |   | -1.79 | 0.001595006 | 0.005776476 |
| Pden_2908 |             | short-chain dehydrogenase/reductase SDR                                 |   | -1.79 | 0.001700567 | 0.006016749 |
| Pden_2913 |             | Cobyrinic acid a,c-diamide synthase                                     |   | -1.72 | 5.27E-04    | 0.002843404 |
| Pden_2914 |             | conserved hypothetical protein                                          |   | 2.63  | 2.10E-04    | 0.001676926 |
| Pden_2915 |             | conserved hypothetical protein                                          |   | 2.04  | 1.57E-04    | 0.00147988  |
| Pden_2922 |             | transcriptional regulator, GntR family                                  |   | 2.06  | 0.001522235 | 0.00560347  |
| Pden_2924 |             | protein of unknown function DUF162                                      |   | -1.92 | 0.001220147 | 0.00478884  |
| Pden_2925 |             | iron-sulfur cluster binding protein                                     |   | -1.95 | 0.002600709 | 0.008099224 |
| Pden_2926 |             | protein of unknown function DUF224, cysteine-rich region domain protein |   | -3.81 | 0.001518839 | 0.005602074 |
| Pden_2927 |             | L-lactate transport                                                     |   | -3.67 | 4.86E-04    | 0.0027113   |
| Pden_2928 | <i>dld</i>  | D-lactate dehydrogenase                                                 |   | 1.84  | 1.49E-04    | 0.001431346 |
| Pden_2939 |             | hypothetical protein                                                    |   | 2.79  | 1.99E-05    | 6.87E-04    |
| Pden_2940 |             | transcriptional regulator, TetR family                                  |   | 2.45  | 2.47E-04    | 0.001838028 |
| Pden_2941 |             | efflux transporter, RND family, MFP subunit                             |   | 3.43  | 1.66E-04    | 0.001500534 |
| Pden_2942 |             | transporter, hydrophobe/amphiphile efflux-1 (HAE1) family               |   | 2.59  | 1.09E-04    | 0.00118008  |
| Pden_2943 |             | RND efflux system, outer membrane lipoprotein, NodT family              |   | 3.06  | 9.36E-05    | 0.001107509 |
| Pden_2944 | <i>thiC</i> | hydroxymethylpyrimidine synthase                                        |   | 2.80  | 1.69E-04    | 0.001507924 |
| Pden_2945 |             | Exopolysaccharide synthesis, ExoD                                       |   | 2.47  | 6.19E-04    | 0.003143078 |
| Pden_2946 |             | PKB domain protein                                                      |   | 1.70  | 6.43E-04    | 0.003202373 |
| Pden_2947 |             | conserved hypothetical protein                                          |   | -1.87 | 8.63E-04    | 0.003825716 |
| Pden_2948 |             | antifreeze protein, type I                                              |   | -2.53 | 1.26E-04    | 0.001288234 |
| Pden_2954 |             | protein of unknown function UPF0118                                     |   | 1.76  | 3.77E-04    | 0.002311838 |
| Pden_2968 |             | hypothetical protein                                                    |   | 2.70  | 9.87E-04    | 0.004188561 |
| Pden_2970 | <i>rpsI</i> | SSU ribosomal protein S9P                                               |   | 2.16  | 8.43E-04    | 0.003795331 |
| Pden_2972 |             | hypothetical protein                                                    |   | 2.98  | 4.69E-04    | 0.002650816 |
| Pden_2984 |             | Methyltransferase type 11                                               |   | 1.85  | 6.74E-04    | 0.003302397 |
| Pden_2985 |             | transcriptional regulator, XRE family                                   |   | 3.37  | 1.63E-04    | 0.001496408 |
| Pden_2986 |             | PEP phosphonmutase and related enzymes-like protein                     |   | 5.07  | 2.25E-05    | 6.88E-04    |
| Pden_2988 |             | hypothetical protein                                                    |   | -2.13 | 0.001470022 | 0.005462966 |
| Pden_2990 |             | two component transcriptional regulator, LuxR family                    |   | -2.71 | 1.67E-04    | 0.001503857 |
| Pden_2998 |             | conserved hypothetical protein                                          |   | 3.48  | 2.32E-05    | 6.88E-04    |
| Pden_2999 |             | MxaA protein, putative                                                  |   | 4.13  | 7.94E-05    | 0.001019694 |
| Pden_3000 |             | von Willebrand factor, type A                                           |   | 4.12  | 1.44E-04    | 0.001397768 |
| Pden_3001 |             | conserved hypothetical protein                                          |   | 3.91  | 3.75E-04    | 0.002309828 |
| Pden_3002 |             | von Willebrand factor, type A                                           |   | 3.84  | 3.48E-05    | 7.44E-04    |
| Pden_3009 |             | chorismate mutase related enzyme                                        |   | 2.04  | 1.79E-04    | 0.001533089 |
| Pden_3030 |             | Methyltransferase type 12                                               |   | 3.15  | 3.99E-05    | 8.15E-04    |
| Pden_3031 |             | transport system permease protein                                       |   | 3.74  | 6.12E-05    | 9.31E-04    |
| Pden_3032 |             | ABC transporter related protein                                         |   | 3.60  | 2.94E-06    | 6.87E-04    |
| Pden_3036 |             | sulphate transporter                                                    |   | 3.47  | 9.27E-06    | 6.87E-04    |
| Pden_3037 |             | Cl <sup>-</sup> channel, voltage-gated family protein                   |   | -1.16 | 0.00166131  | 0.005923996 |
| Pden_3038 |             | choline/carnitine/betaine transporter                                   |   | -2.11 | 7.08E-04    | 0.00381724  |
| Pden_3039 |             | hypothetical protein                                                    |   | -2.12 | 3.48E-04    | 0.002243683 |
| Pden_3046 |             | Alcohol dehydrogenase, zinc-binding domain protein                      |   | 1.36  | 5.84E-04    | 0.003033472 |
| Pden_3049 |             | Transketolase, central region                                           |   | -1.48 | 3.77E-04    | 0.002311838 |
| Pden_3050 |             | regulatory protein, lclR                                                |   | -2.52 | 0.003309041 | 0.009695414 |
| Pden_3051 |             | Endoribonuclease L-PSP                                                  |   | -2.31 | 0.001684712 | 0.005980919 |
| Pden_3052 |             | aminotransferase                                                        |   | -1.62 | 1.81E-04    | 0.001543104 |
| Pden_3053 |             | Amidase                                                                 |   | -1.48 | 4.06E-04    | 0.002419718 |
| Pden_3057 |             | amino acid/amide ABC transporter membrane protein 1, HAAT family        |   | -1.84 | 0.002404502 | 0.007632598 |
| Pden_3058 |             | amino acid/amide ABC transporter membrane protein 2, HAAT family        |   | -2.48 | 6.53E-04    | 0.003231196 |
| Pden_3059 | <i>iaaH</i> | Amidase                                                                 |   | -2.60 | 0.001391354 | 0.0052336   |
| Pden_3061 |             | outer membrane autotransporter barrel domain                            |   | 1.98  | 2.91E-04    | 0.00202724  |
| Pden_3067 |             | conserved hypothetical protein                                          |   | 2.77  | 5.84E-05    | 9.13E-04    |
| Pden_3069 |             | transcriptional regulator, LysR family                                  |   | 2.25  | 4.73E-04    | 0.002669604 |
| Pden_3071 |             | aconitase                                                               |   | -2.85 | 2.09E-05    | 6.87E-04    |
| Pden_3073 |             | protein of unknown function DUF112, transmembrane                       |   | -4.23 | 1.38E-05    | 6.87E-04    |
| Pden_3074 |             | putative tricarboxylic transport membrane protein                       |   | -5.23 | 0.001139941 | 0.004578915 |
| Pden_3075 |             | Uncharacterized protein UPF0065                                         |   | -4.22 | 1.12E-04    | 0.001190496 |
| Pden_3077 |             | gene transfer agent (GTA) like protein                                  |   | 4.33  | 3.87E-05    | 7.97E-04    |
| Pden_3078 |             | conserved hypothetical protein                                          |   | 2.30  | 0.00172509  | 0.006069582 |
| Pden_3080 |             | conserved hypothetical protein                                          |   | -2.00 | 8.41E-04    | 0.003795331 |
| Pden_3081 |             | hypothetical protein                                                    |   | -4.63 | 0.00389514  | 0.009845731 |
| Pden_3082 |             | outer membrane autotransporter barrel domain                            |   | -4.03 | 2.48E-05    | 6.90E-04    |
| Pden_3083 |             | putative outer membrane protein                                         |   | -2.68 | 8.68E-04    | 0.003833364 |
| Pden_3086 |             | hypothetical protein                                                    |   | -3.26 | 0.002027235 | 0.006816224 |
| Pden_3092 |             | conserved hypothetical protein                                          |   | 1.27  | 0.00324695  | 0.009722909 |
| Pden_3099 |             | HupE/UreJ protein                                                       |   | -1.94 | 2.01E-04    | 0.001641009 |
| Pden_3108 | <i>hypB</i> | hydrogenase accessory protein HypB                                      |   | -1.22 | 0.001727543 | 0.006069778 |
| Pden_3109 |             | two component, sigma54 specific, transcriptional regulator, Fis family  |   | -1.08 | 0.003217907 | 0.009468264 |
| Pden_3110 | <i>hypC</i> | hydrogenase assembly chaperone hypC/hupF                                |   | -1.77 | 0.002412303 | 0.007652563 |
| Pden_3111 | <i>hypD</i> | hydrogenase expression/formation protein HypD                           |   | -2.09 | 6.99E-05    | 9.69E-04    |
| Pden_3113 |             | hypothetical protein                                                    |   | 2.80  | 1.46E-05    | 6.87E-04    |
| Pden_3122 |             | phage integrase family protein                                          |   | -3.82 | 8.30E-04    | 0.003764313 |
| Pden_3125 |             | conserved hypothetical protein                                          |   | 1.26  | 5.33E-04    | 0.002866564 |
| Pden_3131 | <i>chrA</i> | chromate transporter, chromate ion transporter (CHR) family             |   | 2.96  | 2.31E-04    | 0.001743752 |
| Pden_3132 |             | Rhodanese domain protein                                                |   | 3.09  | 4.24E-05    | 8.32E-04    |
| Pden_3133 | <i>arsH</i> | NADPH-dependent FMN reductase                                           |   | 1.41  | 4.69E-04    | 0.002650816 |

|           |             |                                                                  |       |             |             |
|-----------|-------------|------------------------------------------------------------------|-------|-------------|-------------|
| Pden_3134 | <i>arsB</i> | arsenical-resistance protein                                     | 2.05  | 2.31E-04    | 0.001746437 |
| Pden_3135 | <i>arsC</i> | arsenate reductase                                               | 2.70  | 6.27E-05    | 9.34E-04    |
| Pden_3136 |             | transcriptional regulator, ArsR family                           | 2.27  | 5.40E-04    | 0.002881826 |
| Pden_3148 |             | protease Do                                                      | -1.60 | 1.77E-04    | 0.001524591 |
| Pden_3149 |             | Phytanoyl-CoA dioxygenase                                        | 3.53  | 3.74E-04    | 0.002309828 |
| Pden_3153 |             | Cupin 2, conserved barrel domain protein                         | 1.56  | 0.001142772 | 0.004581039 |
| Pden_3155 |             | Methyltransferase type 12                                        | 2.74  | 0.001264372 | 0.004905378 |
| Pden_3160 |             | transposase IS116/IS110/IS902 family protein                     | -2.43 | 9.47E-04    | 0.004070411 |
| Pden_3163 |             | conserved hypothetical protein                                   | 2.91  | 8.45E-04    | 0.003801247 |
| Pden_3164 |             | DNA methylase N-4/N-6 domain protein                             | 4.90  | 1.10E-04    | 0.001182514 |
| Pden_3165 |             | hypothetical protein                                             | 3.11  | 8.59E-05    | 0.001060694 |
| Pden_3166 |             | protein of unknown function DUF81                                | 2.08  | 2.14E-04    | 0.001694513 |
| Pden_3167 |             | single-strand binding protein                                    | 4.21  | 5.83E-05    | 9.13E-04    |
| Pden_3169 |             | hypothetical protein                                             | 3.17  | 6.62E-06    | 6.87E-04    |
| Pden_3170 |             | hypothetical protein                                             | 3.73  | 1.59E-05    | 6.87E-04    |
| Pden_3171 |             | transcriptional regulator, XRE family                            | 1.82  | 0.002793347 | 0.00852433  |
| Pden_3172 |             | hypothetical protein                                             | 1.53  | 2.19E-04    | 0.001708297 |
| Pden_3173 |             | hypothetical protein                                             | 3.64  | 6.23E-04    | 0.003147257 |
| Pden_3174 |             | conserved hypothetical protein                                   | 4.09  | 1.46E-05    | 6.87E-04    |
| Pden_3176 |             | conserved hypothetical protein                                   | 1.92  | 0.002359484 | 0.00753695  |
| Pden_3178 |             | putative transcriptional regulator                               | 3.91  | 1.93E-04    | 0.00161701  |
| Pden_3179 |             | replication protein A                                            | 2.96  | 0.001369625 | 0.005178798 |
| Pden_3181 |             | conserved hypothetical protein                                   | 3.50  | 1.34E-05    | 6.87E-04    |
| Pden_3182 |             | C-5 cytosine-specific DNA methylase                              | 4.42  | 4.19E-06    | 6.87E-04    |
| Pden_3183 |             | conjugation peptidase TraF, Serine peptidase, MEROPS family S26C | 3.79  | 9.25E-05    | 0.001100653 |
| Pden_3187 |             | conserved hypothetical protein                                   | 2.51  | 1.51E-04    | 0.001444647 |
| Pden_3188 |             | TRAG family protein                                              | 1.53  | 0.001306954 | 0.005005376 |
| Pden_3190 |             | conserved hypothetical protein                                   | 2.60  | 3.49E-04    | 0.002248218 |
| Pden_3191 |             | hypothetical protein                                             | 1.97  | 6.24E-04    | 0.003147257 |
| Pden_3192 | <i>vapC</i> | PIIT protein domain protein                                      | 2.44  | 0.00165802  | 0.005923996 |
| Pden_3193 |             | putative plasmid stabilization protein                           | 2.29  | 0.002291506 | 0.007366284 |
| Pden_3194 | <i>trbB</i> | type II secretion system protein E                               | 2.26  | 3.85E-04    | 0.00233751  |
| Pden_3202 | <i>trbG</i> | Conjugal transfer protein TrbG/VirB9/CagX                        | 1.60  | 3.46E-04    | 0.002238614 |
| Pden_3203 |             | conjugation TrbI family protein                                  | 1.45  | 4.79E-04    | 0.002686576 |
| Pden_3219 | <i>dctP</i> | TRAP dicarboxylate transporter- DctP subunit                     | -1.63 | 0.002018207 | 0.006807584 |
| Pden_3221 |             | Uncharacterized protein UPF0065                                  | -2.03 | 0.001612147 | 0.005813604 |
| Pden_3230 |             | AMP-dependent synthetase and ligase                              | 1.15  | 0.001090488 | 0.004446969 |
| Pden_3233 |             | transposase IS116/IS110/IS902 family protein                     | -1.33 | 0.001340281 | 0.005102136 |
| Pden_3235 |             | conserved hypothetical protein                                   | -2.97 | 8.35E-04    | 0.003775583 |
| Pden_3245 |             | conserved hypothetical protein                                   | -1.68 | 0.003430816 | 0.009903205 |
| Pden_3247 |             | transposase                                                      | 2.07  | 7.07E-04    | 0.003380658 |
| Pden_3260 |             | aldehyde dehydrogenase                                           | -1.20 | 0.001169112 | 0.004646598 |
| Pden_3266 |             | Uncharacterized protein UPF0065                                  | -2.49 | 2.24E-04    | 0.001715447 |
| Pden_3267 |             | amidohydrolase 2                                                 | -2.47 | 2.74E-05    | 7.03E-04    |
| Pden_3268 |             | protein of unknown function DUF112, transmembrane                | -1.74 | 8.62E-04    | 0.003825716 |
| Pden_3280 |             | Integrase, catalytic region                                      | 2.84  | 0.002536431 | 0.007976368 |
| Pden_3284 |             | two component transcriptional regulator, winged helix family     | 3.98  | 9.13E-04    | 0.003980302 |
| Pden_3294 |             | Heavy metal transport/detoxification protein                     | -1.71 | 1.69E-04    | 0.001507924 |
| Pden_3295 |             | heavy metal translocating P-type ATPase                          | -2.40 | 3.80E-05    | 7.91E-04    |
| Pden_3297 | <i>cadA</i> | heavy metal translocating P-type ATPase                          | 1.94  | 6.74E-04    | 0.003302397 |
| Pden_3298 |             | conserved hypothetical membrane protein                          | 1.54  | 9.31E-04    | 0.004035046 |
| Pden_3299 |             | ABC transporter related protein                                  | 2.48  | 3.99E-04    | 0.002394246 |
| Pden_3300 |             | protein of unknown function DUF214                               | 2.35  | 1.24E-04    | 0.001274131 |
| Pden_3301 |             | efflux transporter, RND family, MFP subunit                      | 2.73  | 1.79E-04    | 0.001533089 |
| Pden_3302 |             | transcriptional regulator, TetR family                           | 2.99  | 7.13E-04    | 0.00340186  |
| Pden_3306 |             | conserved hypothetical protein                                   | 3.56  | 8.60E-05    | 0.001060694 |
| Pden_3308 | <i>tnpB</i> | IS66 Orf2 family protein                                         | 3.22  | 6.54E-04    | 0.003232982 |
| Pden_3309 |             | transposase IS3/IS911 family protein                             | 3.80  | 2.23E-04    | 0.001715447 |
| Pden_3310 |             | hypothetical protein                                             | 4.80  | 0.002554418 | 0.008001781 |
| Pden_3311 |             | response regulator receiver protein                              | 1.49  | 0.001674186 | 0.005952232 |
| Pden_3312 |             | integral membrane sensor signal transduction histidine kinase    | 1.73  | 2.97E-04    | 0.002053033 |
| Pden_3327 |             | hypothetical protein                                             | 5.05  | 2.25E-05    | 6.88E-04    |
| Pden_3334 |             | hypothetical protein                                             | 3.98  | 0.002321676 | 0.007449077 |
| Pden_3337 | <i>chrA</i> | chromate transporter, chromate ion transporter (CHR) family      | 2.96  | 2.30E-04    | 0.001743752 |
| Pden_3338 |             | Rhodanese domain protein                                         | 3.09  | 4.24E-05    | 8.32E-04    |
| Pden_3339 | <i>arsH</i> | NADPH-dependent FMN reductase                                    | 1.49  | 2.89E-04    | 0.002019349 |
| Pden_3340 | <i>arsB</i> | arsenical-resistance protein                                     | 1.66  | 1.04E-04    | 0.001161644 |
| Pden_3341 |             | arsenate reductase                                               | 3.01  | 2.83E-05    | 7.03E-04    |
| Pden_3342 |             | transcriptional regulator, ArsR family                           | 2.77  | 1.46E-05    | 6.87E-04    |
| Pden_3344 |             | sulphate transporter                                             | 4.74  | 6.43E-07    | 6.87E-04    |
| Pden_3345 |             | protein of unknown function DUF1127                              | 2.69  | 5.02E-04    | 0.002762958 |
| Pden_3346 |             | hypothetical protein                                             | 2.60  | 4.16E-04    | 0.002464843 |
| Pden_3347 |             | Glyoxalase/bleomycin resistance protein/dioxygenase              | 2.30  | 4.81E-05    | 8.86E-04    |
| Pden_3348 |             | Methyltransferase type 12                                        | 2.63  | 4.33E-04    | 0.002538599 |
| Pden_3351 |             | Methyltransferase type 11                                        | 2.08  | 7.70E-05    | 0.001002704 |
| Pden_3352 |             | protein of unknown function DUF156                               | 2.41  | 7.32E-05    | 9.81E-04    |
| Pden_3353 | <i>dmeF</i> | cation diffusion facilitator family transporter                  | 2.15  | 5.48E-05    | 9.01E-04    |
| Pden_3354 |             | hypothetical protein                                             | 1.51  | 0.00151569  | 0.005597329 |
| Pden_3357 |             | DNA methylase N-4/N-6 domain protein                             | 5.01  | 1.57E-06    | 6.87E-04    |
| Pden_3358 |             | hypothetical protein                                             | 4.60  | 5.57E-05    | 9.01E-04    |
| Pden_3359 |             | GCN5-related N-acetyltransferase                                 | 1.68  | 5.50E-04    | 0.002920173 |
| Pden_3360 |             | hypothetical protein                                             | 3.57  | 0.002186885 | 0.007171114 |
| Pden_3361 |             | single-strand binding protein                                    | 3.71  | 5.66E-04    | 0.00297487  |
| Pden_3364 |             | hypothetical protein                                             | 2.23  | 2.90E-05    | 7.04E-04    |
| Pden_3365 |             | conserved hypothetical protein                                   | 3.99  | 5.12E-04    | 0.002788261 |
| Pden_3366 |             | hypothetical protein                                             | 2.16  | 1.00E-04    | 0.001137092 |
| Pden_3367 |             | conserved hypothetical protein                                   | 1.62  | 0.002550477 | 0.007995707 |

|           |             |                                                                            |       |             |             |
|-----------|-------------|----------------------------------------------------------------------------|-------|-------------|-------------|
| Pden_3368 |             | transcriptional regulator, XRE family                                      | 1.65  | 0.001351901 | 0.005130941 |
| Pden_3369 |             | hypothetical protein                                                       | 5.03  | 7.26E-06    | 6.87E-04    |
| Pden_3370 |             | putative replication protein A                                             | 3.62  | 2.63E-05    | 7.00E-04    |
| Pden_3371 |             | conserved hypothetical protein                                             | 2.95  | 1.96E-05    | 6.87E-04    |
| Pden_3372 |             | C-5 cytosine-specific DNA methylase                                        | 2.70  | 6.45E-05    | 9.41E-04    |
| Pden_3373 |             | conjugation peptidase TraF, Serine peptidase, MEROPS family S26C           | 2.69  | 2.64E-04    | 0.00192913  |
| Pden_3374 |             | protein of unknown function DUF736                                         | 2.16  | 1.17E-04    | 0.00122534  |
| Pden_3375 |             | Lytic transglycosylase, catalytic                                          | 2.17  | 4.70E-05    | 8.81E-04    |
| Pden_3376 |             | hypothetical protein                                                       | 2.05  | 1.10E-04    | 0.001182514 |
| Pden_3377 |             | conserved hypothetical protein                                             | 3.12  | 4.39E-05    | 8.44E-04    |
| Pden_3378 |             | prevent-host-death family protein                                          | 2.07  | 9.96E-04    | 0.004207138 |
| Pden_3379 | <i>vapC</i> | PilT protein domain protein                                                | 2.27  | 1.41E-04    | 0.001376063 |
| Pden_3385 |             | Tripartite ATP-independent periplasmic transporter, DctQ component         | -1.36 | 0.003341303 | 0.009739216 |
| Pden_3386 |             | cyclase family protein                                                     | -2.12 | 2.21E-04    | 0.001708297 |
| Pden_3387 |             | TRAP dicarboxylate transporter, DctP subunit                               | -2.56 | 8.83E-04    | 0.003885314 |
| Pden_3399 |             | Ferric reductase domain protein transmembrane component, N-terminal domain | 2.58  | 0.001833622 | 0.00634995  |
| Pden_3400 |             | molybdenum cofactor synthesis domain                                       | 4.13  | 3.15E-06    | 6.87E-04    |
| Pden_3401 |             | transposase, IS4 family                                                    | 2.39  | 0.002178103 | 0.007156221 |
| Pden_3402 |             | integral membrane sensor signal transduction histidine kinase              | 1.79  | 0.002342293 | 0.007497521 |
| Pden_3410 |             | hypothetical protein                                                       | 3.26  | 9.49E-05    | 0.001117559 |
| Pden_3411 |             | hypothetical protein                                                       | 4.15  | 3.31E-06    | 6.87E-04    |
| Pden_3412 |             | hypothetical protein                                                       | 1.76  | 2.10E-04    | 0.001676926 |
| Pden_3415 |             | transcriptional regulator, LysR family                                     | 4.30  | 2.47E-04    | 0.001836606 |
| Pden_3423 |             | transcriptional regulator, LysR family                                     | 3.03  | 7.35E-04    | 0.003469659 |
| Pden_3424 |             | dihydrodipicolinate synthetase                                             | -2.27 | 2.67E-05    | 7.01E-04    |
| Pden_3425 |             | branched chain amino acid: 2-keto-4-methylthiobutyrate aminotransferase    | -2.84 | 1.69E-05    | 6.87E-04    |
| Pden_3426 | <i>pxpA</i> | LamB/YcsF family protein                                                   | -2.40 | 6.36E-04    | 0.003177863 |
| Pden_3427 |             | TRAP dicarboxylate transporter- DctP subunit                               | -3.40 | 0.001863084 | 0.00642561  |
| Pden_3428 |             | Tripartite ATP-independent periplasmic transporter, DctQ component         | -2.56 | 2.13E-04    | 0.001694513 |
| Pden_3429 |             | TRAP dicarboxylate transporter, DctM subunit                               | -1.95 | 1.62E-04    | 0.001494676 |
| Pden_3447 |             | efflux transporter, RND family, MFP subunit                                | -1.29 | 8.81E-04    | 0.003878754 |
| Pden_3448 |             | transporter, hydrophobe/amphiphile efflux-1 (HAE1) family                  | -1.73 | 2.07E-04    | 0.00167015  |
| Pden_3450 |             | beta-lactamase                                                             | -2.97 | 4.80E-05    | 8.86E-04    |
| Pden_3452 |             | hypothetical protein                                                       | 1.18  | 0.003160719 | 0.009336478 |
| Pden_3453 |             | hypothetical protein                                                       | 2.25  | 4.88E-05    | 8.89E-04    |
| Pden_3457 |             | FAD dependent oxidoreductase                                               | 1.55  | 0.001528994 | 0.005613704 |
| Pden_3458 | <i>argE</i> | acetylornithine deacetylase ArgE, Metallo peptidase, MEROPS family M20A    | 2.46  | 4.86E-05    | 8.89E-04    |
| Pden_3461 |             | binding-protein-dependent transport systems inner membrane component       | -2.55 | 2.15E-04    | 0.001694513 |
| Pden_3462 |             | binding-protein-dependent transport systems inner membrane component       | -2.56 | 2.89E-04    | 0.002020686 |
| Pden_3463 |             | FAD-dependent pyridine nucleotide-disulfide oxidoreductase                 | 1.65  | 1.93E-04    | 0.001613699 |
| Pden_3465 |             | Rieske (2Fe-2S) domain protein                                             | -2.30 | 6.31E-04    | 0.003164466 |
| Pden_3467 |             | proline racemase                                                           | 2.35  | 2.13E-04    | 0.001694513 |
| Pden_3469 |             | hypothetical protein                                                       | 3.10  | 9.89E-06    | 6.87E-04    |
| Pden_3473 |             | adenyl cyclase class-3/4/guanylyl cyclase                                  | 2.28  | 1.24E-04    | 0.001274131 |
| Pden_3474 |             | protein of unknown function DUF839                                         | 2.03  | 5.05E-05    | 9.00E-04    |
| Pden_3476 |             | NADH:flavin oxidoreductase/NADH oxidase                                    | 1.16  | 0.002980214 | 0.008949481 |
| Pden_3477 |             | putative transcriptional regulator, MerR family                            | 1.32  | 0.00271666  | 0.008330981 |
| Pden_3481 |             | Tripartite ATP-independent periplasmic transporter, DctQ component         | -1.26 | 0.001526695 | 0.005613405 |
| Pden_3489 | <i>pcaQ</i> | transcriptional regulator, LysR family                                     | 2.89  | 0.001160055 | 0.004631986 |
| Pden_3494 |             | protocatechuate 3,4-dioxygenase, alpha subunit                             | -1.33 | 0.002096468 | 0.006983169 |
| Pden_3497 |             | TRAP dicarboxylate transporter- DctP subunit                               | -2.26 | 9.26E-05    | 0.001100653 |
| Pden_3501 |             | Glyoxalase/bleomycin resistance protein/dioxygenase                        | 2.22  | 9.44E-04    | 0.004070411 |
| Pden_3507 |             | Amidohydrolase 3                                                           | 1.78  | 3.21E-04    | 0.002168465 |
| Pden_3508 |             | protein of unknown function DUF894, DitE                                   | 2.33  | 9.14E-04    | 0.003980302 |
| Pden_3512 |             | transcriptional regulator, MarR family                                     | 1.48  | 0.001083495 | 0.004432197 |
| Pden_3513 |             | transcriptional regulator, LysR family                                     | 1.66  | 3.38E-04    | 0.002227917 |
| Pden_3514 |             | Allantoinase                                                               | 3.34  | 8.41E-06    | 6.87E-04    |
| Pden_3515 |             | amidase, hydantoinase/carbamoylase family                                  | 3.37  | 1.66E-04    | 0.001500534 |
| Pden_3516 |             | protein of unknown function DUF917                                         | 1.48  | 0.001528157 | 0.005613704 |
| Pden_3517 | <i>hutU</i> | urocanate hydratase                                                        | 1.99  | 5.60E-05    | 9.01E-04    |
| Pden_3525 |             | ABC transporter related protein                                            | 1.66  | 0.002639881 | 0.008199827 |
| Pden_3526 |             | conserved hypothetical protein                                             | 2.29  | 3.19E-05    | 7.09E-04    |
| Pden_3528 |             | transcriptional regulator, IclR family                                     | 1.21  | 0.003363561 | 0.009787189 |
| Pden_3529 |             | ABC transporter related protein                                            | 3.21  | 0.002288358 | 0.007365516 |
| Pden_3533 |             | transport system permease protein                                          | 2.26  | 1.10E-04    | 0.001182514 |
| Pden_3534 |             | transport system permease protein                                          | 3.96  | 6.35E-04    | 0.0031761   |
| Pden_3535 |             | Glutathione S-transferase, N-terminal domain                               | -2.43 | 9.26E-04    | 0.004022714 |
| Pden_3536 |             | transcriptional regulator, GntR family                                     | -1.70 | 0.002468688 | 0.007792374 |
| Pden_3538 |             | TRAP-T family transporter, DctQ (4 TMs) subunit                            | -2.39 | 0.002512912 | 0.007922088 |
| Pden_3540 |             | TRAP dicarboxylate transporter- DctP subunit                               | -4.97 | 2.19E-04    | 0.001708297 |
| Pden_3541 |             | short-chain dehydrogenase/reductase SDR                                    | -3.98 | 1.29E-04    | 0.001304482 |
| Pden_3542 |             | short-chain dehydrogenase/reductase SDR                                    | -3.22 | 4.95E-04    | 0.002741428 |
| Pden_3543 |             | fumarate reductase/succinate dehydrogenase flavoprotein domain protein     | -3.04 | 7.01E-04    | 0.003359157 |
| Pden_3544 |             | hypothetical protein                                                       | -2.16 | 0.00224208  | 0.007272039 |
| Pden_3550 | <i>pseF</i> | acylneuraminate cytidyltransferase                                         | 1.64  | 4.42E-04    | 0.00255247  |
| Pden_3551 |             | flagellin modification protein FlmD                                        | 1.76  | 1.89E-04    | 0.00159937  |
| Pden_3553 |             | NAD-dependent epimerase/dehydratase                                        | 1.09  | 0.001348411 | 0.005121532 |
| Pden_3557 | <i>pseC</i> | DegT/DnrJ/EryC1/StrS aminotransferase                                      | 1.16  | 0.002886005 | 0.008739141 |
| Pden_3561 |             | transposase IS116/IS110/IS902 family protein                               | -2.43 | 9.58E-04    | 0.004097585 |
| Pden_3566 |             | two component transcriptional regulator, winged helix family               | 2.16  | 2.57E-05    | 7.00E-04    |
| Pden_3574 |             | amino acid/amide ABC transporter substrate-binding protein, HAAT family    | -2.58 | 0.00228419  | 0.007255299 |
| Pden_3578 |             | protein of unknown function DUF849                                         | -2.66 | 0.001912924 | 0.006548435 |
| Pden_3579 | <i>hisD</i> | histidinol dehydrogenase                                                   | -1.97 | 0.002163163 | 0.007125631 |
| Pden_3583 |             | short-chain dehydrogenase/reductase SDR                                    | -2.19 | 3.39E-04    | 0.002230025 |
| Pden_3584 |             | FAD-linked oxidoreductase                                                  | -3.06 | 2.35E-05    | 6.88E-04    |
| Pden_3585 | <i>eutH</i> | Ethanolamine utilization protein, EutH                                     | -1.81 | 0.002369436 | 0.007559204 |
| Pden_3586 |             | transglutaminase domain protein                                            | -2.70 | 1.60E-05    | 6.87E-04    |

|           |              |                                                                                                                |   |       |             |             |
|-----------|--------------|----------------------------------------------------------------------------------------------------------------|---|-------|-------------|-------------|
| Pden_3587 |              | conserved hypothetical protein                                                                                 |   | -1.91 | 0.001278709 | 0.004938294 |
| Pden_3595 | <i>inpB</i>  | IS66 Orf2 family protein                                                                                       |   | 3.59  | 3.45E-04    | 0.002238614 |
| Pden_3596 |              | phage tape measure protein                                                                                     |   | 4.36  | 6.17E-05    | 9.33E-04    |
| Pden_3597 |              | hypothetical protein                                                                                           |   | 4.65  | 6.89E-05    | 9.64E-04    |
| Pden_3598 |              | hypothetical protein                                                                                           |   | 4.05  | 2.19E-05    | 6.88E-04    |
| Pden_3600 |              | hypothetical protein                                                                                           |   | 4.40  | 5.00E-04    | 0.002752653 |
| Pden_3601 |              | Fibronectin, type III domain protein                                                                           |   | 3.30  | 1.42E-05    | 6.87E-04    |
| Pden_3604 |              | hypothetical protein                                                                                           |   | 2.77  | 2.35E-05    | 6.88E-04    |
| Pden_3608 |              | hypothetical protein                                                                                           |   | 4.86  | 4.73E-06    | 6.87E-04    |
| Pden_3611 |              | conserved hypothetical protein                                                                                 |   | 1.69  | 0.001768755 | 0.006171016 |
| Pden_3612 | <i>ileS</i>  | Isoleucyl-tRNA synthetase                                                                                      |   | 1.67  | 2.01E-04    | 0.001641009 |
| Pden_3614 |              | conserved hypothetical protein                                                                                 |   | 2.04  | 5.51E-04    | 0.002920173 |
| Pden_3615 |              | Glyoxalase/bleomycin resistance protein/dioxygenase                                                            |   | 2.32  | 0.001283383 | 0.004945029 |
| Pden_3617 | <i>mhA</i>   | ribonuclease H                                                                                                 |   | 2.02  | 0.002108678 | 0.007005405 |
| Pden_3618 |              | Glutathione S-transferase, C-terminal domain                                                                   |   | 2.39  | 0.001732105 | 0.006081587 |
| Pden_3619 | <i>ispH</i>  | 4-hydroxy-3-methylbut-2-enyl diphosphate reductase                                                             |   | 1.57  | 0.001123258 | 0.004527912 |
| Pden_3622 |              | GCN5-related N-acetyltransferase                                                                               |   | 2.64  | 0.001549955 | 0.005670103 |
| Pden_3624 |              | conserved hypothetical protein                                                                                 |   | 1.59  | 5.81E-04    | 0.003020797 |
| Pden_3625 |              | AAA ATPase                                                                                                     |   | 1.52  | 7.88E-04    | 0.003635439 |
| Pden_3627 |              | Lysine exporter protein (LYSE/YGGA)                                                                            |   | 3.33  | 6.76E-05    | 9.57E-04    |
| Pden_3631 | <i>cobD</i>  | adenosylcobinamide-phosphate synthase                                                                          |   | 2.71  | 0.002793401 | 0.00852433  |
| Pden_3637 |              | Propionyl-CoA carboxylase                                                                                      |   | -1.46 | 0.00225985  | 0.00731094  |
| Pden_3643 |              | major facilitator superfamily MFS_1                                                                            |   | 4.77  | 7.20E-04    | 0.003412359 |
| Pden_3644 |              | conserved hypothetical protein                                                                                 |   | -1.44 | 0.001094758 | 0.00445637  |
| Pden_3651 | <i>aqpZ</i>  | MIP family channel protein                                                                                     |   | -1.78 | 4.11E-04    | 0.002443868 |
| Pden_3652 |              | ABC transporter related protein                                                                                |   | 2.43  | 1.00E-04    | 0.001137092 |
| Pden_3662 |              | FMN adenyltransferase / riboflavin kinase                                                                      |   | 2.37  | 9.60E-05    | 0.001121864 |
| Pden_3667 | <i>ispDF</i> | 2-C-methyl-D-erythritol 4-phosphate cytidyltransferase / 2-C-methyl-D-erythritol 2,4-cyclodiphosphate synthase |   | 1.68  | 0.001724282 | 0.006069582 |
| Pden_3674 |              | NUDX hydrolase                                                                                                 |   | 3.06  | 9.02E-06    | 6.87E-04    |
| Pden_3675 |              | conserved hypothetical protein                                                                                 |   | 1.51  | 0.001961772 | 0.006668949 |
| Pden_3678 |              | homoserine dehydrogenase                                                                                       |   | 1.68  | 2.92E-04    | 0.002033768 |
| Pden_3679 |              | hypothetical protein                                                                                           |   | -1.50 | 7.18E-04    | 0.003408842 |
| Pden_3684 |              | biotin carboxyl carrier protein / biotin carboxylase                                                           |   | -1.27 | 0.001936225 | 0.006614782 |
| Pden_3688 |              | propionyl-CoA carboxylase carboxyltransferase subunit                                                          |   | -2.06 | 0.002383033 | 0.007583468 |
| Pden_3690 |              | protein of unknown function DUF140                                                                             |   | 2.67  | 0.001689597 | 0.005990496 |
| Pden_3691 |              | ABC transporter related protein                                                                                |   | 3.27  | 0.001000095 | 0.004216054 |
| Pden_3695 |              | GCN5-related N-acetyltransferase                                                                               |   | -1.28 | 6.75E-04    | 0.003302397 |
| Pden_3698 | <i>trmJ</i>  | RNA methyltransferase, TrmH family, group 1                                                                    |   | 2.99  | 6.86E-05    | 9.62E-04    |
| Pden_3701 | <i>miaB</i>  | tRNA-(6)A37 thiotransferase enzyme MiaB                                                                        |   | 2.83  | 5.40E-05    | 9.01E-04    |
| Pden_3702 |              | glutamate-putrescine ligase                                                                                    |   | -1.94 | 2.21E-04    | 0.001708297 |
| Pden_3704 |              | amino acid ABC transporter membrane protein 1, PAAT family                                                     |   | -2.27 | 1.85E-05    | 6.87E-04    |
| Pden_3705 |              | amino acid ABC transporter substrate-binding protein, PAAT family                                              |   | -3.04 | 3.67E-04    | 0.002309564 |
| Pden_3710 |              | hypothetical protein                                                                                           |   | 1.58  | 4.30E-04    | 0.002528783 |
| Pden_3711 | <i>pyrG</i>  | CTP synthase                                                                                                   |   | 1.64  | 0.002087504 | 0.006962472 |
| Pden_3712 | <i>secG</i>  | protein translocase subunit secG                                                                               |   | 2.47  | 6.60E-05    | 9.47E-04    |
| Pden_3713 | <i>cobQ</i>  | adenosylcobyrinic acid synthase (glutamine-hydrolysing)                                                        |   | 1.82  | 0.00266188  | 0.008227777 |
| Pden_3714 |              | short-chain dehydrogenase/reductase SDR                                                                        |   | 1.56  | 0.002210708 | 0.007225642 |
| Pden_3717 | <i>glx2</i>  | glutamyl-tRNA synthetase                                                                                       |   | 1.18  | 0.002930434 | 0.00883647  |
| Pden_3719 |              | Heme NO binding domain protein                                                                                 |   | 1.99  | 1.10E-04    | 0.001182514 |
| Pden_3720 |              | diguanylate cyclase                                                                                            |   | 1.57  | 4.85E-04    | 0.002709733 |
| Pden_3721 |              | conserved hypothetical protein                                                                                 |   | 1.89  | 7.18E-05    | 9.81E-04    |
| Pden_3722 |              | hypothetical protein                                                                                           |   | 2.99  | 7.00E-05    | 9.69E-04    |
| Pden_3727 |              | hypothetical protein                                                                                           |   | 1.69  | 8.65E-04    | 0.003825889 |
| Pden_3739 |              | putative phage-related protein                                                                                 | 4 | 1.41  | 0.00291323  | 0.008790037 |
| Pden_3742 |              | hypothetical protein                                                                                           | 4 | 2.62  | 6.60E-04    | 0.003246886 |
| Pden_3748 |              | hypothetical protein                                                                                           | 4 | 1.91  | 5.55E-04    | 0.002935927 |
| Pden_3749 |              | conserved hypothetical protein                                                                                 | 4 | 2.59  | 0.001132505 | 0.004557929 |
| Pden_3750 |              | hypothetical protein                                                                                           | 4 | 2.69  | 6.34E-05    | 9.35E-04    |
| Pden_3751 |              | conserved hypothetical protein                                                                                 | 4 | 2.82  | 2.87E-04    | 0.002014555 |
| Pden_3756 |              | phage terminase, large subunit, PBSX family                                                                    | 4 | 1.15  | 0.002946438 | 0.008870761 |
| Pden_3758 |              | hypothetical protein                                                                                           | 4 | 2.83  | 2.42E-05    | 6.88E-04    |
| Pden_3759 |              | putative head-tail connector protein                                                                           | 4 | 4.30  | 1.83E-05    | 6.87E-04    |
| Pden_3760 |              | hypothetical protein                                                                                           | 4 | 4.00  | 2.87E-04    | 0.002014555 |
| Pden_3767 |              | conserved hypothetical protein                                                                                 | 4 | 2.48  | 1.26E-05    | 6.87E-04    |
| Pden_3768 |              | conserved hypothetical protein                                                                                 | 4 | 3.10  | 0.001672898 | 0.005952129 |
| Pden_3769 |              | conserved hypothetical protein                                                                                 |   | 2.08  | 0.001174601 | 0.004659024 |
| Pden_3775 |              | hypothetical protein                                                                                           |   | 2.66  | 7.42E-04    | 0.003490386 |
| Pden_3776 |              | hypothetical protein                                                                                           |   | 2.87  | 0.001536336 | 0.005628414 |
| Pden_3777 |              | hypothetical protein                                                                                           |   | 2.89  | 0.001487127 | 0.005520031 |
| Pden_3778 |              | metallophosphoesterase                                                                                         |   | 3.75  | 1.84E-05    | 6.87E-04    |
| Pden_3780 |              | Peptidoglycan-binding domain 1 protein                                                                         |   | 3.49  | 1.57E-04    | 0.00147988  |
| Pden_3781 |              | hypothetical protein                                                                                           |   | 3.65  | 0.002357106 | 0.007534109 |
| Pden_3784 | <i>cmk</i>   | cytidylate kinase                                                                                              |   | 2.41  | 0.001012026 | 0.004248664 |
| Pden_3785 |              | 2-nitropropane dioxygenase, NPD                                                                                |   | 2.27  | 7.04E-04    | 0.003368992 |
| Pden_3793 | <i>alkB</i>  | DNA-N1-methyladenine dioxygenase                                                                               |   | 1.37  | 0.002143573 | 0.007074909 |
| Pden_3798 |              | aminotransferase                                                                                               |   | 1.19  | 0.003118405 | 0.009239266 |
| Pden_3799 |              | MirC domain protein                                                                                            |   | 1.37  | 6.87E-04    | 0.00331005  |
| Pden_3800 |              | extracellular solute-binding protein, family 5                                                                 |   | -1.49 | 6.02E-04    | 0.003082284 |
| Pden_3811 | <i>mfd</i>   | transcription-repair coupling factor                                                                           |   | 2.00  | 8.69E-05    | 0.001065159 |
| Pden_3812 | <i>clpA</i>  | ATP-dependent Clp protease, ATP-binding subunit clpA                                                           |   | -2.03 | 2.58E-04    | 0.001899163 |
| Pden_3820 |              | conserved hypothetical protein                                                                                 |   | 2.76  | 0.002651512 | 0.008219791 |
| Pden_3821 |              | alpha/beta hydrolase fold protein                                                                              |   | -1.00 | 0.002517387 | 0.007926729 |
| Pden_3828 |              | hypothetical protein                                                                                           |   | 5.37  | 1.58E-04    | 0.00147988  |
| Pden_3829 |              | hypothetical protein                                                                                           |   | 5.06  | 6.53E-07    | 6.87E-04    |
| Pden_3832 |              | hypothetical protein                                                                                           |   | 2.31  | 3.45E-04    | 0.002238614 |
| Pden_3833 |              | conserved hypothetical protein                                                                                 |   | 1.16  | 0.001567175 | 0.005716576 |



|           |                         |                                                                                 |       |             |             |
|-----------|-------------------------|---------------------------------------------------------------------------------|-------|-------------|-------------|
| Pden_3834 |                         | hypothetical protein                                                            | 4.77  | 3.50E-05    | 7.45E-04    |
| Pden_3844 |                         | transposase IS116/IS110/IS902 family protein                                    | -2.42 | 9.71E-04    | 0.00413176  |
| Pden_3849 |                         | phage integrase family protein                                                  | -3.79 | 5.08E-04    | 0.002784714 |
| Pden_3851 |                         | hypothetical protein                                                            | 4.47  | 2.80E-05    | 7.03E-04    |
| Pden_3852 |                         | hypothetical protein                                                            | 5.00  | 3.45E-06    | 6.87E-04    |
| Pden_3853 |                         | hypothetical protein                                                            | 3.43  | 1.77E-05    | 6.87E-04    |
| Pden_3854 |                         | hypothetical protein                                                            | 3.82  | 4.31E-04    | 0.002528783 |
| Pden_3855 |                         | hypothetical protein                                                            | 5.11  | 4.64E-04    | 0.002633628 |
| Pden_3856 |                         | Substrate-binding region of ABC-type glycine betaine transport system           | 1.77  | 1.65E-04    | 0.001498242 |
| Pden_3857 |                         | binding-protein-dependent transport systems inner membrane component            | 2.52  | 1.98E-04    | 0.001638254 |
| Pden_3859 |                         | hypothetical protein                                                            | 1.83  | 0.001800865 | 0.006257913 |
| Pden_3860 |                         | NUDIX hydrolase                                                                 | 2.17  | 0.00119233  | 0.004705196 |
| Pden_3865 | <i>gyrA</i>             | DNA gyrase, A subunit                                                           | 1.17  | 0.002709546 | 0.008319243 |
| Pden_3867 |                         | DedA family protein                                                             | 2.22  | 0.00215374  | 0.007101757 |
| Pden_3870 |                         | cyclase/dehydrase                                                               | 1.07  | 0.001416484 | 0.005308407 |
| Pden_3871 |                         | conserved hypothetical protein                                                  | 2.09  | 0.001083049 | 0.004432197 |
| Pden_3874 |                         | conserved hypothetical protein                                                  | 2.66  | 3.22E-05    | 7.09E-04    |
| Pden_3876 |                         | protein of unknown function DUF6, transmembrane                                 | -1.40 | 8.59E-04    | 0.003825716 |
| Pden_3878 | <i>ffh</i>              | signal recognition particle subunit FFH/SRP54 (srp54)                           | 2.93  | 7.61E-04    | 0.003556641 |
| Pden_3879 |                         | GCN5-related N-acetyltransferase                                                | 2.64  | 0.002588372 | 0.008069538 |
| Pden_3887 |                         | chromosome partitioning protein                                                 | 2.19  | 7.24E-05    | 9.81E-04    |
| Pden_3890 |                         | pyruvate dehydrogenase complex dihydrolipoamide acetyltransferase               | -1.58 | 0.001455555 | 0.005414752 |
| Pden_3891 |                         | Transketolase, central region                                                   | -1.80 | 0.001747949 | 0.006124474 |
| Pden_3895 |                         | conserved hypothetical protein                                                  | -1.78 | 5.36E-04    | 0.002869505 |
| Pden_3896 |                         | protein of unknown function DUF1523                                             | -2.00 | 0.001532365 | 0.005621808 |
| Pden_3897 | <i>deoC</i>             | deoxyribose-phosphate aldolase                                                  | -1.11 | 0.003226421 | 0.009483852 |
| Pden_3911 |                         | protein of unknown function DUF81                                               | 2.21  | 7.71E-04    | 0.003589064 |
| Pden_3912 |                         | hypothetical protein                                                            | 1.52  | 0.002666452 | 0.008236879 |
| Pden_3914 |                         | protein of unknown function DUF989                                              | -3.14 | 7.24E-04    | 0.003427327 |
| Pden_3915 | <i>uraH</i>             | Transthyretin                                                                   | -2.33 | 0.001593359 | 0.005776476 |
| Pden_3916 |                         | amidohydrolase                                                                  | -2.01 | 3.71E-04    | 0.002309828 |
| Pden_3917 |                         | uracil-xanthine permease                                                        | -2.45 | 0.001083757 | 0.004432197 |
| Pden_3923 |                         | hypothetical protein                                                            | 2.36  | 2.41E-04    | 0.001801579 |
| Pden_3925 |                         | transcriptional regulator, SARP family                                          | 2.06  | 0.002653397 | 0.008219791 |
| Pden_3926 | <i>purM</i>             | phosphoribosylformylglycinamide cyclo-ligase                                    | 1.67  | 0.001183148 | 0.004676252 |
| Pden_3927 | <i>purN</i>             | formyltetrahydrofolate-dependent phosphoribosylglycinamide formyltransferase    | 1.39  | 3.47E-04    | 0.002241764 |
| Pden_3928 |                         | amino acid/amide ABC transporter membrane protein 2, HAAT family                | -2.15 | 6.84E-04    | 0.00331005  |
| Pden_3929 |                         | amino acid/amide ABC transporter membrane protein 1, HAAT family                | -2.64 | 2.23E-04    | 0.001715447 |
| Pden_3930 |                         | amino acid/amide ABC transporter ATP-binding protein 2, HAAT family             | -2.74 | 6.31E-04    | 0.003164466 |
| Pden_3931 |                         | amino acid/amide ABC transporter ATP-binding protein 1, HAAT family             | -3.23 | 0.001895938 | 0.006500951 |
| Pden_3932 |                         | amino acid/amide ABC transporter substrate-binding protein, HAAT family         | -3.79 | 1.63E-05    | 6.87E-04    |
| Pden_3936 | <i>gmk</i>              | guanylate kinase                                                                | 1.60  | 5.75E-04    | 0.003000752 |
| Pden_3941 | <i>radA</i>             | DNA replication and repair protein RadA                                         | 1.38  | 3.89E-04    | 0.002358731 |
| Pden_3946 |                         | phospholipase/Carboxylesterase                                                  | 1.58  | 6.75E-04    | 0.003302397 |
| Pden_3948 |                         | small multidrug resistance protein                                              | 3.45  | 1.40E-04    | 0.001373789 |
| Pden_3949 |                         | HNH endonuclease                                                                | 1.96  | 0.001862602 | 0.00642561  |
| Pden_3951 |                         | Radical SAM domain protein                                                      | 4.08  | 2.70E-05    | 7.01E-04    |
| Pden_3957 |                         | amino acid/amide ABC transporter substrate-binding protein, HAAT family         | -1.39 | 7.27E-04    | 0.003436171 |
| Pden_3961 |                         | Mg chelatase, subunit ChlI                                                      | 2.67  | 3.11E-05    | 7.09E-04    |
| Pden_3962 | <i>coaBC</i>            | Phosphopantothienylcysteine decarboxylase / Phosphopantothenate-cysteine ligase | 2.08  | 0.001491023 | 0.005527823 |
| Pden_3971 | <i>purL</i>             | phosphoribosylformylglycinamide synthase subunit II                             | 1.35  | 8.58E-04    | 0.003825716 |
| Pden_3976 |                         | conserved hypothetical protein                                                  | 4.01  | 9.52E-06    | 6.87E-04    |
| Pden_3982 |                         | response regulator receiver modulated diguanylate cyclase                       | 2.73  | 2.06E-04    | 0.001670021 |
| Pden_3984 |                         | aminotransferase                                                                | -2.50 | 2.41E-04    | 0.001800109 |
| Pden_3985 |                         | cytochrome P450                                                                 | 2.09  | 8.27E-04    | 0.003758078 |
| Pden_3986 |                         | conserved hypothetical protein                                                  | 2.98  | 3.98E-04    | 0.002393936 |
| Pden_3987 |                         | peptidase M48, Ste24p                                                           | 1.88  | 0.00276867  | 0.008480205 |
| Pden_3988 |                         | VWA containing CoxE family protein                                              | 2.43  | 1.67E-05    | 6.87E-04    |
| Pden_3989 |                         | Ppx/GppA phosphatase                                                            | 3.24  | 1.08E-04    | 0.001177715 |
| Pden_3990 | <i>rlmE (ftsJ rrmJ)</i> | 23S rRNA Um-2552 2'-O-methyltransferase                                         | 2.81  | 3.61E-04    | 0.002294387 |
| Pden_3997 | <i>dxr</i>              | 1-deoxy-D-xylulose 5-phosphate reductoisomerase                                 | 2.11  | 1.73E-04    | 0.001509649 |
| Pden_3998 | <i>rseP</i>             | site-2 protease, Metallo peptidase, MEROPS family M50B                          | 1.84  | 0.002811845 | 0.008560656 |
| Pden_4002 |                         | Penicillin amidase                                                              | 2.43  | 7.29E-05    | 9.81E-04    |
| Pden_4006 |                         | major facilitator superfamily MFS_1                                             | 1.37  | 8.42E-04    | 0.003795331 |
| Pden_4015 |                         | Linocin_M18 bacteriocin protein                                                 | -1.70 | 4.84E-04    | 0.002708578 |
| Pden_4016 |                         | protein of unknown function UPF0187                                             | -1.74 | 3.04E-04    | 0.002090985 |
| Pden_4018 | <i>urtB</i>             | amino acid/amide ABC transporter membrane protein 1, HAAT family                | 1.86  | 0.001650375 | 0.005905195 |
| Pden_4019 | <i>urtC</i>             | amino acid/amide ABC transporter membrane protein 2, HAAT family                | 2.87  | 2.84E-04    | 0.00201284  |
| Pden_4020 | <i>urtD</i>             | ABC transporter related protein                                                 | 2.32  | 2.89E-04    | 0.002019349 |
| Pden_4023 | <i>gph</i>              | phosphoglycolate phosphatase                                                    | -1.67 | 0.00166265  | 0.005923996 |
| Pden_4025 | <i>typA</i>             | GTP-binding protein TypA                                                        | 2.77  | 1.39E-05    | 6.87E-04    |
| Pden_4027 |                         | ferredoxin                                                                      | 1.44  | 0.002282799 | 0.007361665 |
| Pden_4029 | <i>purD</i>             | phosphoribosylamine-glycine ligase                                              | 2.30  | 3.78E-04    | 0.002311838 |
| Pden_4031 |                         | conserved hypothetical protein                                                  | 1.55  | 9.15E-04    | 0.003981577 |
| Pden_4032 | <i>mreB</i>             | rod shape-determining protein MreB                                              | 2.00  | 1.14E-04    | 0.001204078 |
| Pden_4033 | <i>mreC</i>             | rod shape-determining protein MreC                                              | 2.42  | 3.21E-05    | 7.09E-04    |
| Pden_4034 |                         | putative rod shape-determining protein MreD                                     | 2.58  | 0.001302079 | 0.004990481 |
| Pden_4035 | <i>mrdA</i>             | peptidoglycan glycosyltransferase                                               | 1.82  | 1.17E-04    | 0.001230568 |
| Pden_4040 |                         | protein of unknown function DUF161                                              | 1.41  | 8.76E-04    | 0.003863525 |
| Pden_4045 | <i>chrA</i>             | chromate transporter, chromate ion transporter (CHR) family                     | 1.30  | 0.00218415  | 0.007167014 |
| Pden_4047 |                         | NAD(P) transhydrogenase, beta subunit                                           | -1.07 | 0.002573854 | 0.008034168 |
| Pden_4048 |                         | NAD(P) transhydrogenase, alpha subunit                                          | -1.16 | 0.001103107 | 0.004476884 |
| Pden_4049 |                         | protein of unknown function DUF1498                                             | -1.27 | 0.001675278 | 0.005952232 |
| Pden_4050 |                         | Isoprenylcysteine carboxyl methyltransferase                                    | 2.97  | 2.23E-05    | 6.88E-04    |
| Pden_4051 | <i>glcB</i>             | Malate synthase                                                                 | 1.97  | 7.31E-05    | 9.81E-04    |
| Pden_4055 | <i>proB</i>             | glutamate 5-kinase                                                              | 3.19  | 2.16E-04    | 0.001694513 |
| Pden_4056 | <i>obgE</i>             | small GTP-binding protein                                                       | 3.09  | 8.52E-04    | 0.003818535 |

|           |               |                                                                                             |       |             |             |
|-----------|---------------|---------------------------------------------------------------------------------------------|-------|-------------|-------------|
| Pden_4059 |               | Endonuclease/exonuclease/phosphatase                                                        | -1.20 | 0.001201134 | 0.004728881 |
| Pden_4061 |               | conserved hypothetical protein                                                              | 2.62  | 0.001976153 | 0.006701447 |
| Pden_4062 |               | 2-isopropylmalate synthase                                                                  | 1.76  | 3.11E-04    | 0.002120136 |
| Pden_4063 | <i>cysS</i>   | cysteinyl-tRNA synthetase                                                                   | 2.26  | 1.62E-04    | 0.001494676 |
| Pden_4065 |               | hypothetical protein                                                                        | -1.50 | 2.20E-04    | 0.001708297 |
| Pden_4071 |               | NADPH-dependent FMN reductase                                                               | -2.90 | 0.00311747  | 0.009239266 |
| Pden_4073 | <i>dnaG</i>   | DNA primase                                                                                 | 2.33  | 5.92E-04    | 0.00305499  |
| Pden_4074 |               | transcriptional regulator, TetR family                                                      | 2.96  | 1.90E-04    | 0.00159937  |
| Pden_4078 | <i>trmFO</i>  | gid protein                                                                                 | 2.95  | 1.59E-05    | 6.87E-04    |
| Pden_4079 | <i>gluQRS</i> | glutamyl-tRNA synthetase, class Ic                                                          | 2.78  | 8.82E-05    | 0.001071072 |
| Pden_4081 |               | NifU-related protein involved in Fe-S cluster formation                                     | 2.09  | 3.78E-04    | 0.002311838 |
| Pden_4083 | <i>ligA</i>   | DNA ligase, NAD-dependent                                                                   | 1.47  | 0.00321092  | 0.009462681 |
| Pden_4093 |               | hypothetical protein                                                                        | 2.65  | 2.47E-05    | 6.90E-04    |
| Pden_4094 |               | hypothetical protein                                                                        | 2.47  | 1.01E-04    | 0.001137092 |
| Pden_4098 | <i>mnmA</i>   | tRNA (5-methylaminomethyl-2-thiouridylate)-methyltransferase                                | 1.41  | 0.001120848 | 0.004521794 |
| Pden_4099 |               | Cysteine desulfuration protein SufE                                                         | 1.54  | 6.79E-04    | 0.003306024 |
| Pden_4101 |               | GCN5-related N-acetyltransferase                                                            | 2.25  | 8.38E-05    | 0.001045151 |
| Pden_4110 |               | HpcH/Hpal aldolase                                                                          | 3.74  | 2.72E-04    | 0.001970419 |
| Pden_4111 |               | conserved hypothetical protein                                                              | 2.41  | 8.21E-05    | 0.001034    |
| Pden_4112 |               | L-carnitine dehydratase/bile acid-inducible protein F                                       | 2.61  | 4.07E-05    | 8.15E-04    |
| Pden_4118 |               | transcriptional regulator, LysR family                                                      | -2.06 | 7.04E-04    | 0.003368992 |
| Pden_4123 | <i>hflX</i>   | GTP-binding protein HflX                                                                    | 1.67  | 2.77E-04    | 0.001988805 |
| Pden_4130 |               | signal transduction histidine kinase, nitrogen specific, NtrB                               | 1.83  | 1.34E-04    | 0.001332887 |
| Pden_4131 | <i>dusB</i>   | tRNA-U20-dihydrouridine synthase                                                            | 2.14  | 0.001519188 | 0.005602074 |
| Pden_4136 |               | hypothetical protein                                                                        | -1.70 | 9.56E-04    | 0.004096078 |
| Pden_4140 |               | periplasmic solute binding protein                                                          | 2.36  | 1.74E-04    | 0.001512937 |
| Pden_4141 |               | hypothetical protein                                                                        | -3.42 | 2.09E-04    | 0.001676926 |
| Pden_4142 |               | RNA-binding S4 domain protein                                                               | 2.18  | 9.53E-05    | 0.001120076 |
| Pden_4143 | <i>tadA</i>   | CMP/dCMP deaminase, zinc-binding protein                                                    | 2.53  | 2.82E-05    | 7.03E-04    |
| Pden_4144 |               | pyruvate carboxylase                                                                        | 1.16  | 0.002215658 | 0.007228013 |
| Pden_4146 |               | transcriptional regulator, ArsR family                                                      | 2.22  | 8.46E-04    | 0.003801247 |
| Pden_4151 | <i>soxY</i>   | thiosulfate-binding protein SoxY                                                            | -1.88 | 0.002364635 | 0.007548642 |
| Pden_4153 | <i>soxA</i>   | diheme cytochrome SoxA (sulfur oxidation)                                                   | -2.39 | 5.34E-04    | 0.002869505 |
| Pden_4160 |               | SoxH protein-like protein                                                                   | -1.32 | 0.003041277 | 0.009096801 |
| Pden_4165 | <i>azoR</i>   | (Acyl-carrier-protein) phosphodiesterase                                                    | -2.15 | 0.00124923  | 0.004865271 |
| Pden_4166 |               | NnrS family protein                                                                         | 2.47  | 5.17E-04    | 0.002804411 |
| Pden_4167 |               | ABC transporter related protein                                                             | 3.37  | 2.68E-05    | 7.01E-04    |
| Pden_4168 |               | binding-protein-dependent transport systems inner membrane component                        | 3.07  | 4.18E-04    | 0.002469493 |
| Pden_4169 |               | putative sulfonate/nitrate transport system substrate-binding protein                       | 2.04  | 0.001071706 | 0.00441142  |
| Pden_4170 |               | hypothetical protein                                                                        | 2.25  | 4.02E-05    | 8.15E-04    |
| Pden_4171 |               | conserved hypothetical protein                                                              | 2.52  | 3.73E-04    | 0.002309828 |
| Pden_4172 |               | transcriptional regulator, BadM/Rrf2 family                                                 | 2.30  | 9.31E-04    | 0.004030546 |
| Pden_4173 |               | TonB-dependent receptor                                                                     | 1.92  | 0.001164643 | 0.00464298  |
| Pden_4174 |               | transcriptional regulator, DeoR family                                                      | 1.16  | 0.001390664 | 0.0052336   |
| Pden_4178 |               | mannitol ABC transporter ATP-binding protein / sorbitol ABC transporter ATP-binding protein | -1.73 | 0.001395511 | 0.005245341 |
| Pden_4179 |               | sorbitol ABC transporter membrane protein / mannitol ABC transporter membrane protein       | -2.09 | 3.11E-04    | 0.002120136 |
| Pden_4180 |               | mannitol ABC transporter membrane protein / sorbitol ABC transporter membrane protein       | -2.13 | 0.002189361 | 0.007174243 |
| Pden_4182 | <i>queF</i>   | GTP cyclohydrolase I                                                                        | 1.80  | 0.002140403 | 0.007069055 |
| Pden_4183 | <i>queE</i>   | preQ(0) biosynthesis protein QueE                                                           | 3.40  | 1.96E-05    | 6.87E-04    |
| Pden_4184 |               | 6-pyruvoyl tetrahydropterin synthase and hypothetical protein                               | 3.38  | 8.37E-06    | 6.87E-04    |
| Pden_4185 | <i>queC</i>   | exsB protein                                                                                | 3.63  | 4.79E-05    | 8.86E-04    |
| Pden_4186 | <i>ligD</i>   | conserved hypothetical protein                                                              | 2.64  | 5.85E-05    | 9.13E-04    |
| Pden_4187 | <i>ugpC</i>   | carbohydrate ABC transporter ATP-binding protein, CUT1 family                               | -1.98 | 1.88E-04    | 0.001592668 |
| Pden_4188 | <i>ugpE</i>   | carbohydrate ABC transporter membrane protein 2, CUT1 family                                | -3.35 | 2.87E-04    | 0.002014555 |
| Pden_4189 | <i>ugpA</i>   | carbohydrate ABC transporter membrane protein 1, CUT1 family                                | -3.56 | 8.70E-06    | 6.87E-04    |
| Pden_4190 | <i>ugpB</i>   | carbohydrate ABC transporter substrate-binding protein, CUT1 family                         | -3.13 | 6.44E-06    | 6.87E-04    |
| Pden_4191 |               | hypothetical protein                                                                        | 2.34  | 1.64E-04    | 0.001498242 |
| Pden_4192 |               | hypothetical protein                                                                        | 2.54  | 3.08E-04    | 0.002109645 |
| Pden_4196 |               | hypothetical protein                                                                        | 2.61  | 0.001013213 | 0.004250121 |
| Pden_4202 |               | hemin-degrading family protein                                                              | -3.26 | 2.27E-04    | 0.001730572 |
| Pden_4210 |               | response regulator receiver protein                                                         | -2.41 | 8.41E-04    | 0.003795331 |
| Pden_4211 |               | SSS sodium solute transporter superfamily                                                   | -3.42 | 2.26E-04    | 0.001729094 |
| Pden_4213 | <i>acs</i>    | acetyl-coenzyme A synthetase                                                                | -2.16 | 5.29E-05    | 9.01E-04    |
| Pden_4217 |               | ABC transporter related protein                                                             | 1.84  | 0.001152638 | 0.00461259  |
| Pden_4223 |               | conserved hypothetical protein                                                              | 1.67  | 5.10E-04    | 0.00278709  |
| Pden_4227 |               | conserved hypothetical protein                                                              | 2.23  | 0.003004582 | 0.009006631 |
| Pden_4231 |               | conserved hypothetical protein                                                              | 1.38  | 0.002893516 | 0.008751417 |
| Pden_4232 |               | PpIC-type peptidyl-prolyl cis-trans isomerase                                               | 1.25  | 8.23E-04    | 0.003744016 |
| Pden_4233 | <i>narI</i>   | respiratory nitrate reductase gamma subunit                                                 | 1.38  | 5.09E-04    | 0.002784714 |
| Pden_4234 | <i>narJ</i>   | respiratory nitrate reductase chaperone NarJ                                                | -1.11 | 0.00268689  | 0.008277841 |
| Pden_4241 |               | drug resistance transporter, Bcr/CfiA subfamily                                             | 3.05  | 0.001293285 | 0.00497183  |
| Pden_4243 |               | GntR domain protein                                                                         | 1.39  | 4.64E-04    | 0.002633628 |
| Pden_4249 |               | sodium:dicarboxylate symporter                                                              | -1.26 | 0.002606089 | 0.008101389 |
| Pden_4254 |               | protein of unknown function DUF81                                                           | 3.78  | 1.71E-04    | 0.001509512 |
| Pden_4255 |               | molecular chaperone, DnaK                                                                   | 5.07  | 2.40E-05    | 6.88E-04    |
| Pden_4257 | <i>xdhA</i>   | molybdopterin dehydrogenase, FAD-binding protein                                            | -2.34 | 0.002169528 | 0.00714195  |
| Pden_4258 | <i>xdhB</i>   | xanthine dehydrogenase, molybdenum binding subunit apoprotein / Xanthine oxidase            | -2.81 | 8.59E-04    | 0.003825716 |
| Pden_4259 | <i>xdhC</i>   | molybdenum cofactor sulfurylase                                                             | -2.12 | 6.25E-04    | 0.003147257 |
| Pden_4260 | <i>guaD</i>   | guanine deaminase                                                                           | -2.26 | 0.001580048 | 0.005746971 |
| Pden_4261 |               | acetone carboxylase, gamma subunit                                                          | -6.15 | 7.53E-04    | 0.003532514 |
| Pden_4262 |               | acetone carboxylase, alpha subunit                                                          | -7.07 | 6.79E-04    | 0.003306024 |
| Pden_4263 |               | acetone carboxylase, beta subunit                                                           | -6.41 | 5.04E-04    | 0.002762958 |
| Pden_4270 |               | amino acid/amide ABC transporter membrane protein 2, HAAT family                            | -4.72 | 0.002998236 | 0.00899293  |
| Pden_4271 |               | amino acid/amide ABC transporter membrane protein 1, HAAT family                            | -5.25 | 0.002219671 | 0.007231971 |
| Pden_4272 |               | amino acid/amide ABC transporter substrate-binding protein, HAAT family                     | -5.94 | 0.001195529 | 0.004714145 |
| Pden_4273 | <i>tpa</i>    | aminotransferase                                                                            | -5.22 | 1.60E-04    | 0.001489115 |
| Pden_4274 |               | transcriptional regulator, GntR family                                                      | -2.80 | 5.98E-04    | 0.003074387 |

|           |              |                                                                            |       |             |             |
|-----------|--------------|----------------------------------------------------------------------------|-------|-------------|-------------|
| Pden_4275 | <i>pta</i>   | phosphotransacetylase                                                      | 2.37  | 9.24E-04    | 0.004015527 |
| Pden_4276 |              | conserved hypothetical protein 698                                         | 2.08  | 0.00104852  | 0.004358501 |
| Pden_4279 |              | major facilitator superfamily MFS_1                                        | 2.13  | 0.002136688 | 0.007066005 |
| Pden_4281 |              | oligopeptide/dipeptide ABC transporter, ATPase subunit                     | 2.34  | 4.00E-04    | 0.002394246 |
| Pden_4289 |              | conserved hypothetical protein                                             | 2.27  | 0.003218424 | 0.009468264 |
| Pden_4291 | <i>dnaE2</i> | error-prone DNA polymerase, DnaE-like protein                              | 1.44  | 9.46E-04    | 0.004070411 |
| Pden_4293 |              | transcriptional regulator, HxlR family                                     | 1.64  | 0.001812206 | 0.006293002 |
| Pden_4301 | <i>acnA</i>  | aconitase                                                                  | -2.29 | 0.001546117 | 0.005660151 |
| Pden_4303 | <i>rpsD</i>  | SSU ribosomal protein S4P                                                  | 2.22  | 0.002229754 | 0.007255299 |
| Pden_4305 | <i>tpiA</i>  | triosephosphate isomerase                                                  | 1.34  | 0.001659612 | 0.005923996 |
| Pden_4306 | <i>metN</i>  | ABC transporter related protein                                            | 2.12  | 0.001071673 | 0.00441142  |
| Pden_4309 |              | Acetyl-CoA hydrolase                                                       | 1.14  | 0.001882291 | 0.006469312 |
| Pden_4312 |              | FAD linked oxidase domain protein                                          | 1.77  | 0.001508609 | 0.005578741 |
| Pden_4313 |              | GCN5-related N-acetyltransferase                                           | 2.43  | 8.80E-04    | 0.003878366 |
| Pden_4314 |              | peptidase M16 domain protein                                               | 1.30  | 0.001558081 | 0.005691604 |
| Pden_4322 | <i>tlpD</i>  | microcin-processing peptidase 2, Unknown type peptidase, MEROPS family U62 | 1.69  | 0.003118686 | 0.009239266 |
| Pden_4323 | <i>dprA</i>  | DNA protecting protein DprA                                                | 3.48  | 1.39E-05    | 6.87E-04    |
| Pden_4329 | <i>pstC</i>  | phosphate ABC transporter membrane protein 1, PhoT family                  | 1.79  | 3.98E-04    | 0.002393936 |
| Pden_4330 |              | phosphate ABC transporter substrate-binding protein, PhoT family           | 3.26  | 4.22E-06    | 6.87E-04    |
| Pden_4331 |              | hypothetical protein                                                       | 2.39  | 0.001776789 | 0.006186991 |
| Pden_4333 |              | hypothetical protein                                                       | 2.64  | 8.48E-04    | 0.003806599 |
| Pden_4334 |              | amino acid/polyamine/organocation transporter, APC superfamily             | -2.70 | 1.52E-04    | 0.001450721 |
| Pden_4335 |              | type I secretion membrane fusion protein, HlyD family                      | 3.21  | 6.36E-05    | 9.35E-04    |
| Pden_4336 |              | type I secretion system ATPase                                             | 2.95  | 2.16E-05    | 6.88E-04    |
| Pden_4337 |              | conserved hypothetical protein                                             | 2.88  | 5.43E-05    | 9.01E-04    |
| Pden_4345 |              | secretion protein HlyD family protein                                      | 2.98  | 2.60E-05    | 7.00E-04    |
| Pden_4346 |              | colicin V processing peptidase, Cysteine peptidase, MEROPS family C39      | 3.15  | 3.73E-04    | 0.002309828 |
| Pden_4350 |              | periplasmic glucan biosynthesis protein, MdoG                              | -1.08 | 0.001175238 | 0.004659024 |
| Pden_4351 |              | permease for cytosine/purines, uracil, thiamine, allantoin                 | 1.46  | 6.83E-04    | 0.00331005  |
| Pden_4352 |              | 5-oxoprolinase (ATP-hydrolyzing)                                           | -2.23 | 4.38E-05    | 8.44E-04    |
| Pden_4353 |              | 5-oxoprolinase (ATP-hydrolyzing)                                           | -1.44 | 0.00120508  | 0.004740731 |
| Pden_4364 |              | ThiJ/PfpI domain protein                                                   | 3.14  | 2.06E-04    | 0.001670021 |
| Pden_4365 |              | transcriptional regulator, AraC family with amidase-like domain            | 2.11  | 8.63E-04    | 0.003825716 |
| Pden_4366 |              | DEAD/DEAH box helicase domain protein                                      | 4.89  | 1.17E-06    | 6.87E-04    |
| Pden_4368 |              | sodium:dicarboxylate symporter                                             | -4.38 | 1.66E-04    | 0.001500534 |
| Pden_4370 |              | conserved hypothetical protein 698                                         | 4.15  | 0.001520498 | 0.005602824 |
| Pden_4371 |              | conserved hypothetical protein                                             | 2.42  | 5.27E-04    | 0.002843404 |
| Pden_4373 |              | TonB-dependent siderophore receptor                                        | -1.51 | 5.38E-04    | 0.002874906 |
| Pden_4376 | <i>nrdI</i>  | NrdI protein                                                               | -1.38 | 0.002932109 | 0.00883647  |
| Pden_4379 |              | Bile acid:sodium symporter                                                 | 2.65  | 0.003356376 | 0.009771899 |
| Pden_4380 |              | putative transcriptional regulator, GntR family                            | 1.32  | 0.00232327  | 0.007258821 |
| Pden_4381 |              | TrkA-C domain protein                                                      | 3.07  | 7.98E-05    | 0.001019694 |
| Pden_4382 |              | TonB-dependent receptor                                                    | 1.94  | 6.58E-05    | 9.47E-04    |
| Pden_4383 |              | periplasmic binding protein                                                | 2.65  | 4.75E-05    | 8.86E-04    |
| Pden_4384 |              | transport system permease protein                                          | 3.11  | 3.79E-04    | 0.002312901 |
| Pden_4385 |              | ABC transporter related protein                                            | 3.07  | 1.73E-04    | 0.001509512 |
| Pden_4387 |              | carbohydrate ABC transporter substrate-binding protein, CUT1 family        | -2.32 | 1.52E-04    | 0.001450721 |
| Pden_4393 | <i>glpD</i>  | homodimeric glycerol 3-phosphate dehydrogenase (quinone)                   | 1.63  | 2.39E-04    | 0.001791022 |
| Pden_4397 | <i>glcF</i>  | protein of unknown function DUF224, cysteine-rich region domain protein    | -3.03 | 3.00E-05    | 7.09E-04    |
| Pden_4398 |              | FAD linked oxidase domain protein                                          | -2.08 | 0.002816558 | 0.00856985  |
| Pden_4401 |              | Uncharacterized protein UPF0065                                            | -5.80 | 9.11E-05    | 0.001090823 |
| Pden_4402 |              | protein of unknown function DUF112, transmembrane                          | -5.52 | 1.46E-04    | 0.001416129 |
| Pden_4403 |              | protein of unknown function DUF1468                                        | -5.33 | 1.39E-04    | 0.00136816  |
| Pden_4404 |              | Uncharacterized protein UPF0065                                            | -5.19 | 3.85E-04    | 0.00233751  |
| Pden_4417 | <i>lepA</i>  | GTP-binding protein LepA                                                   | 2.03  | 3.31E-05    | 7.22E-04    |
| Pden_4418 |              | protein of unknown function DUF6, transmembrane                            | 2.63  | 0.00103233  | 0.004323147 |
| Pden_4421 |              | phosphonate metabolism protein PhnM                                        | 1.73  | 4.00E-04    | 0.002394246 |
| Pden_4422 |              | alkylhydroperoxidase like protein, AhpD family                             | 2.72  | 6.73E-05    | 9.57E-04    |
| Pden_4423 |              | phosphoglucomutase/phosphomannomutase alpha/beta/alpha domain I            | -1.39 | 0.003242166 | 0.009521511 |
| Pden_4427 | <i>glgC</i>  | glucose-1-phosphate adenyllyltransferase                                   | -1.95 | 1.00E-04    | 0.001137092 |
| Pden_4430 | <i>nadC</i>  | nicotinate-nucleotide pyrophosphorylase (carboxylating)                    | 1.29  | 4.77E-04    | 0.002686491 |
| Pden_4431 |              | L-aspartate oxidase                                                        | 1.79  | 0.001435091 | 0.005357684 |
| Pden_4434 |              | putative aminotransferase, class IV                                        | 2.69  | 5.50E-04    | 0.002920173 |
| Pden_4435 |              | aminodeoxychorismate synthase, subunit I                                   | 2.94  | 8.05E-04    | 0.003682344 |
| Pden_4442 |              | carbohydrate ABC transporter substrate-binding protein, CUT1 family        | 2.84  | 0.002062811 | 0.006893739 |
| Pden_4447 |              | extracellular solute-binding protein, family 1                             | -4.27 | 1.40E-05    | 6.87E-04    |
| Pden_4449 |              | assimilatory nitrate reductase (NADH) alpha subunit apoprotein             | 2.34  | 0.003405643 | 0.009867016 |
| Pden_4452 |              | assimilatory nitrite reductase (NAD(P)H) large subunit precursor           | 2.75  | 4.28E-05    | 8.32E-04    |
| Pden_4453 |              | major facilitator superfamily MFS_1                                        | 3.25  | 5.10E-05    | 9.00E-04    |
| Pden_4454 |              | putative nitrate transport protein                                         | 2.90  | 3.53E-04    | 0.00226395  |
| Pden_4455 |              | response regulator receiver and ANTAR domain protein                       | 3.31  | 1.58E-05    | 6.87E-04    |
| Pden_4458 |              | RNA binding S1 domain protein                                              | 2.47  | 2.99E-05    | 7.09E-04    |
| Pden_4459 |              | hypothetical protein                                                       | 3.10  | 0.001963935 | 0.006668949 |
| Pden_4461 |              | nitrogen regulatory protein P-II                                           | -1.41 | 9.48E-04    | 0.004070411 |
| Pden_4462 | <i>glnA</i>  | L-glutamine synthetase                                                     | -2.87 | 0.002703924 | 0.008311152 |
| Pden_4463 |              | Adenylosuccinate lyase                                                     | 1.74  | 2.73E-04    | 0.001974225 |
| Pden_4464 |              | flagellar motor switch protein FlhG                                        | 3.96  | 1.63E-04    | 0.001496408 |
| Pden_4469 |              | replicative DNA helicase                                                   | 1.68  | 0.001644619 | 0.005892926 |
| Pden_4479 |              | methylmalonate-semialdehyde dehydrogenase (acylating)                      | -2.50 | 7.81E-04    | 0.00362655  |
| Pden_4480 |              | acyl-CoA dehydrogenase domain protein                                      | -2.41 | 1.78E-05    | 6.87E-04    |
| Pden_4481 |              | Enoyl-CoA hydratase/isomerase                                              | -2.22 | 3.81E-04    | 0.002323045 |
| Pden_4482 | <i>mmsB</i>  | 3-hydroxyisobutyrate dehydrogenase                                         | -2.29 | 1.26E-04    | 0.001288234 |
| Pden_4484 | <i>recN</i>  | DNA replication and repair protein RecN                                    | 2.42  | 5.11E-04    | 0.002788261 |
| Pden_4487 | <i>ftsZ</i>  | cell division protein FtsZ                                                 | -1.54 | 6.64E-04    | 0.003261511 |
| Pden_4491 | <i>murB</i>  | UDP-N-acetylmuramate dehydrogenase                                         | 2.49  | 2.39E-04    | 0.001790755 |
| Pden_4502 |              | ABC polyamine transporter, periplasmic substrate-binding protein           | -2.83 | 9.69E-06    | 6.87E-04    |
| Pden_4503 | <i>proA</i>  | glutamate-5-semialdehyde dehydrogenase                                     | 2.56  | 3.28E-05    | 7.19E-04    |



|           |             |                                                                     |       |             |             |
|-----------|-------------|---------------------------------------------------------------------|-------|-------------|-------------|
| Pden_4506 |             | ornithine-acyl[acyl carrier protein] N-acyltransferase              | 1.89  | 4.53E-04    | 0.002599236 |
| Pden_4507 |             | lyso-ornithine lipid acyltransferase                                | 2.00  | 0.002082582 | 0.006950636 |
| Pden_4509 |             | conserved hypothetical protein                                      | 1.47  | 5.03E-04    | 0.002762958 |
| Pden_4510 | <i>ubiB</i> | 2-octaprenylphenol hydroxylase                                      | 1.79  | 5.74E-05    | 9.13E-04    |
| Pden_4511 | <i>ubiE</i> | 2-octaprenyl-6-methoxy-1,4-benzoquinone methylase                   | 1.38  | 4.94E-04    | 0.002738506 |
| Pden_4515 |             | 3-demethylubiquinone-9 3-methyltransferase                          | -2.69 | 4.95E-04    | 0.002741428 |
| Pden_4516 |             | 3-demethylubiquinone-9 3-methyltransferase                          | -1.61 | 4.21E-04    | 0.002481719 |
| Pden_4517 |             | transcriptional regulator, MarR family                              | 2.24  | 0.001713949 | 0.006047193 |
| Pden_4518 |             | regulatory protein, ArsR                                            | 3.10  | 4.52E-05    | 8.61E-04    |
| Pden_4522 |             | Glyoxalase/bleomycin resistance protein/dioxygenase                 | 3.23  | 3.64E-06    | 6.87E-04    |
| Pden_4523 |             | putative transcriptional regulator, MerR family                     | 1.70  | 1.41E-04    | 0.001376063 |
| Pden_4524 |             | hypothetical protein                                                | 2.69  | 5.53E-05    | 9.01E-04    |
| Pden_4525 |             | transcriptional regulator, MarR family                              | 3.20  | 4.05E-04    | 0.002417316 |
| Pden_4526 |             | Methyltransferase type 11                                           | 2.00  | 8.61E-05    | 0.001060694 |
| Pden_4527 |             | transcriptional regulator, MarR family                              | 2.31  | 3.16E-05    | 7.09E-04    |
| Pden_4533 |             | RNA polymerase, sigma subunit, ECF family                           | 4.26  | 1.68E-04    | 0.00150607  |
| Pden_4534 |             | putative FecR                                                       | 3.98  | 6.25E-04    | 0.003147257 |
| Pden_4535 |             | TonB-dependent siderophore receptor                                 | 3.11  | 5.94E-06    | 6.87E-04    |
| Pden_4541 |             | hypothetical protein                                                | 2.59  | 2.56E-05    | 7.00E-04    |
| Pden_4542 |             | transcriptional regulator, RpiR family                              | 1.87  | 2.44E-04    | 0.001819959 |
| Pden_4545 |             | TRAP C4-dicarboxylate transport system permease DctM subunit        | -1.62 | 4.63E-04    | 0.002631196 |
| Pden_4546 | <i>dctP</i> | TRAP dicarboxylate transporter- DctP subunit                        | -3.58 | 0.001037435 | 0.00432914  |
| Pden_4547 |             | L-glutamine synthetase                                              | -2.72 | 2.67E-04    | 0.001946418 |
| Pden_4549 |             | iron-containing alcohol dehydrogenase                               | -2.00 | 9.56E-04    | 0.004096078 |
| Pden_4550 | <i>acs</i>  | acetyl-coenzyme A synthetase                                        | -2.15 | 5.76E-05    | 9.13E-04    |
| Pden_4551 |             | conserved hypothetical protein                                      | -5.76 | 0.002241435 | 0.007272039 |
| Pden_4552 |             | Na <sup>+</sup> /solute symporter                                   | -4.15 | 1.72E-05    | 6.87E-04    |
| Pden_4553 |             | cyclic nucleotide-binding protein                                   | -3.70 | 2.76E-05    | 7.03E-04    |
| Pden_4558 |             | RNA polymerase, sigma-24 subunit, ECF subfamily                     | 2.03  | 7.39E-05    | 9.86E-04    |
| Pden_4560 |             | sodium/sulphate symporter                                           | 3.74  | 0.001707847 | 0.006035961 |
| Pden_4561 |             | Glycerate kinase                                                    | 2.85  | 3.69E-04    | 0.002309828 |
| Pden_4562 |             | Hemolysin-type calcium-binding region                               | 1.11  | 0.001164572 | 0.00464298  |
| Pden_4563 |             | transcriptional regulator, LysR family                              | 1.69  | 3.14E-04    | 0.00213146  |
| Pden_4566 |             | protein of unknown function DUF6, transmembrane                     | 4.15  | 9.46E-07    | 6.87E-04    |
| Pden_4568 |             | hypothetical protein                                                | 3.37  | 9.34E-06    | 6.87E-04    |
| Pden_4569 |             | hypothetical protein                                                | 3.21  | 1.72E-05    | 6.87E-04    |
| Pden_4570 |             | hypothetical protein                                                | 1.52  | 0.001150466 | 0.004608236 |
| Pden_4572 |             | major facilitator superfamily MFS_1                                 | 2.44  | 1.85E-04    | 0.001572457 |
| Pden_4573 |             | protein of unknown function DUF6, transmembrane                     | 2.25  | 2.98E-05    | 7.09E-04    |
| Pden_4574 |             | aldo/keto reductase                                                 | 1.41  | 0.00284294  | 0.008639738 |
| Pden_4575 |             | transcriptional regulator, LysR family                              | 1.97  | 0.003312038 | 0.009698582 |
| Pden_4578 |             | Cupin 2, conserved barrel domain protein                            | 2.66  | 4.26E-05    | 8.32E-04    |
| Pden_4579 |             | transcriptional regulator, HxlR family                              | 3.24  | 5.36E-04    | 0.002869505 |
| Pden_4581 |             | transcriptional regulator, LysR family                              | 2.16  | 0.001762835 | 0.006155335 |
| Pden_4582 |             | conserved hypothetical protein                                      | 1.54  | 4.36E-04    | 0.002545539 |
| Pden_4584 |             | short-chain dehydrogenase/reductase SDR                             | 2.03  | 9.62E-04    | 0.004108812 |
| Pden_4588 |             | putative molecular chaperone small heat shock protein, HSP20 family | 2.16  | 5.42E-04    | 0.002889217 |
| Pden_4589 |             | hypothetical protein                                                | 3.23  | 6.83E-05    | 9.60E-04    |
| Pden_4591 |             | Rhodanese domain protein                                            | -1.32 | 5.11E-04    | 0.002788261 |
| Pden_4592 |             | uncharacterized peroxidase-related enzyme                           | -2.50 | 3.44E-04    | 0.002238614 |
| Pden_4594 |             | thiamine pyrophosphate enzyme domain protein TPP-binding protein    | -1.08 | 0.002010128 | 0.006788563 |
| Pden_4599 |             | putative CoA transferase, subunit B                                 | 1.20  | 0.003412287 | 0.009872234 |
| Pden_4603 |             | putative ABC transporter binding protein component                  | -2.32 | 0.001067049 | 0.004402992 |
| Pden_4605 |             | conserved hypothetical protein                                      | 2.22  | 0.002215414 | 0.007228013 |
| Pden_4606 |             | Radical SAM domain protein                                          | 2.43  | 6.23E-05    | 9.34E-04    |
| Pden_4607 |             | Uracil-DNA glycosylase superfamily                                  | 3.47  | 2.05E-05    | 6.87E-04    |
| Pden_4608 |             | putative general stress protein 26                                  | 1.83  | 1.32E-04    | 0.001321016 |
| Pden_4609 |             | phospholipase D/Transphosphatidylase                                | 3.33  | 2.48E-05    | 6.90E-04    |
| Pden_4610 |             | FAD dependent oxidoreductase                                        | 2.75  | 0.00110356  | 0.004476884 |
| Pden_4611 |             | Catalase                                                            | 1.88  | 5.38E-04    | 0.002874906 |
| Pden_4612 |             | Peptidoglycan-binding domain 1 protein                              | 1.92  | 4.05E-04    | 0.002417316 |
| Pden_4613 |             | conserved hypothetical protein                                      | 4.54  | 3.37E-04    | 0.002227917 |
| Pden_4615 |             | esterase, PHB depolymerase family                                   | 1.68  | 2.33E-04    | 0.001755773 |
| Pden_4616 | <i>hydA</i> | dihydropyrimidinase                                                 | -1.62 | 6.08E-04    | 0.003101533 |
| Pden_4624 |             | transcriptional regulator, AsnC family                              | 1.50  | 4.31E-04    | 0.002528783 |
| Pden_4627 |             | hypothetical protein                                                | 3.86  | 0.00333821  | 0.009735806 |
| Pden_4628 |             | D-amino-acid dehydrogenase                                          | 1.95  | 2.96E-04    | 0.002049708 |
| Pden_4629 |             | peptidase S9, prolyl oligopeptidase active site domain protein      | 2.21  | 3.86E-05    | 7.97E-04    |
| Pden_4630 |             | transcriptional regulator, TetR family                              | 1.32  | 4.34E-04    | 0.002539593 |
| Pden_4631 |             | major facilitator superfamily MFS_1                                 | 1.18  | 0.001442857 | 0.005379369 |
| Pden_4632 |             | beta-lactamase                                                      | 2.10  | 0.002059529 | 0.006887314 |
| Pden_4633 |             | Uncharacterized conserved protein UCP012702                         | 2.45  | 1.26E-04    | 0.001288342 |
| Pden_4634 |             | Leucyl aminopeptidase                                               | 2.24  | 8.32E-04    | 0.003768614 |
| Pden_4635 |             | peptidase M42 family protein                                        | 2.03  | 7.44E-05    | 9.87E-04    |
| Pden_4637 |             | ornithine cyclodeaminase                                            | 2.62  | 1.70E-04    | 0.001509512 |
| Pden_4638 |             | hypothetical protein                                                | 3.26  | 8.29E-06    | 6.87E-04    |
| Pden_4641 |             | conserved hypothetical protein                                      | -2.02 | 0.002773026 | 0.00848841  |
| Pden_4642 |             | conserved hypothetical protein                                      | -2.39 | 8.04E-05    | 0.001023289 |
| Pden_4649 |             | extracellular solute-binding protein, family 1                      | -1.49 | 3.59E-04    | 0.002286436 |
| Pden_4675 |             | transcriptional regulator, RpiR family                              | 2.14  | 6.04E-05    | 9.27E-04    |
| Pden_4677 |             | 2OG-Fe(II) oxygenase                                                | -1.97 | 2.17E-04    | 0.00169785  |
| Pden_4685 |             | secretion protein HlyD family protein                               | 2.27  | 3.20E-05    | 7.09E-04    |
| Pden_4686 | <i>rbpA</i> | ABC transporter related protein                                     | 2.57  | 5.17E-05    | 9.01E-04    |
| Pden_4688 |             | YbaK/prolyl-tRNA synthetase associated region                       | 3.13  | 2.85E-05    | 7.03E-04    |
| Pden_4689 |             | hypothetical protein                                                | 2.35  | 1.36E-04    | 0.001341221 |
| Pden_4690 |             | phosphatidyl-N-methylethanolamine N-methyltransferase               | 1.60  | 2.75E-04    | 0.001983635 |
| Pden_4691 | <i>pssA</i> | CDP-diacylglycerol-serine O-phosphatidyltransferase                 | 1.78  | 1.03E-04    | 0.001157656 |

|           |             |                                                                         |       |             |             |
|-----------|-------------|-------------------------------------------------------------------------|-------|-------------|-------------|
| Pden_4692 | <i>psd</i>  | phosphatidylserine decarboxylase related protein                        | 2.23  | 3.49E-04    | 0.002245802 |
| Pden_4693 |             | uracil-xanthine permease                                                | 2.76  | 2.26E-05    | 6.88E-04    |
| Pden_4696 |             | acriflavin resistance protein                                           | 1.90  | 2.10E-04    | 0.001676926 |
| Pden_4700 |             | cytochrome c, class II                                                  | 1.62  | 0.002520892 | 0.007932429 |
| Pden_4709 |             | conserved hypothetical protein                                          | 2.35  | 4.99E-04    | 0.002752317 |
| Pden_4713 | <i>minC</i> | septum site-determining protein MinC                                    | 2.32  | 0.001588279 | 0.005772762 |
| Pden_4714 |             | phosphoribosyltransferase                                               | 3.85  | 1.12E-04    | 0.001190496 |
| Pden_4723 |             | periplasmic nitrate reductase subunit NapC                              | -1.81 | 0.001787674 | 0.006220615 |
| Pden_4725 |             | conserved hypothetical protein                                          | 4.04  | 2.18E-05    | 6.88E-04    |
| Pden_4726 |             | MscS Mechanosensitive ion channel                                       | 5.21  | 9.02E-06    | 6.87E-04    |
| Pden_4728 | <i>mauR</i> | transcriptional regulator, LysR family                                  | 3.79  | 5.57E-05    | 9.01E-04    |
| Pden_4729 | <i>mauF</i> | conserved hypothetical protein                                          | 2.01  | 8.87E-04    | 0.003893864 |
| Pden_4736 | <i>mauG</i> | Di-heme cytochrome c peroxidase                                         | 2.13  | 1.65E-04    | 0.001498242 |
| Pden_4737 | <i>mauM</i> | periplasmic nitrate reductase subunit NapG                              | 3.11  | 1.88E-05    | 6.87E-04    |
| Pden_4738 | <i>mauN</i> | periplasmic nitrate reductase subunit NapH                              | 3.14  | 3.68E-05    | 7.74E-04    |
| Pden_4742 |             | conserved hypothetical protein                                          | 1.40  | 4.78E-04    | 0.002686576 |
| Pden_4743 |             | Peptidoglycan-binding domain 1 protein                                  | 2.99  | 0.003041849 | 0.009096801 |
| Pden_4746 |             | binding-protein-dependent transport systems inner membrane component    | 1.66  | 0.001276463 | 0.004938294 |
| Pden_4752 |             | aldehyde dehydrogenase                                                  | -1.50 | 0.001381861 | 0.005219358 |
| Pden_4753 |             | dihydropicolinate synthetase                                            | -1.47 | 3.75E-04    | 0.002309828 |
| Pden_4754 |             | conserved hypothetical protein                                          | 3.60  | 9.05E-06    | 6.87E-04    |
| Pden_4755 |             | putative carbohydrate binding protein                                   | 2.78  | 8.31E-06    | 6.87E-04    |
| Pden_4762 |             | conserved hypothetical protein                                          | 2.65  | 4.46E-04    | 0.002570923 |
| Pden_4763 |             | two component, sigma54 specific, transcriptional regulator, Fis family  | 1.47  | 0.002660957 | 0.008227777 |
| Pden_4772 |             | RNA polymerase, sigma-24 subunit, ECF subfamily                         | 1.55  | 0.003395161 | 0.009856478 |
| Pden_4775 |             | protein of unknown function DUF1045                                     | 1.44  | 0.001255229 | 0.004884876 |
| Pden_4782 | <i>phnG</i> | phosphonate metabolism PhnG                                             | 1.76  | 4.47E-04    | 0.002574525 |
| Pden_4783 | <i>phnF</i> | transcriptional regulator, GntR family                                  | 3.42  | 4.34E-04    | 0.002539593 |
| Pden_4784 | <i>phnE</i> | phosphonate ABC transporter, inner membrane subunit                     | 3.96  | 1.74E-05    | 6.87E-04    |
| Pden_4785 | <i>phnE</i> | phosphonate ABC transporter, inner membrane subunit                     | 4.23  | 6.86E-04    | 0.00331005  |
| Pden_4786 | <i>phnD</i> | phosphonate ABC transporter, periplasmic phosphonate-binding protein    | 4.06  | 1.25E-05    | 6.87E-04    |
| Pden_4787 | <i>phnC</i> | phosphonate ABC transporter, ATPase subunit                             | 4.88  | 2.87E-05    | 7.03E-04    |
| Pden_4788 |             | hypothetical protein                                                    | 2.11  | 9.18E-04    | 0.003994968 |
| Pden_4789 |             | NADPH-dependent FMN reductase                                           | 2.05  | 0.001509064 | 0.005578741 |
| Pden_4793 |             | amino acid/amide ABC transporter ATP-binding protein 2, HAAT family     | -3.27 | 2.36E-05    | 6.88E-04    |
| Pden_4794 |             | amino acid/amide ABC transporter ATP-binding protein 1, HAAT family     | -3.52 | 3.09E-05    | 7.09E-04    |
| Pden_4795 |             | amino acid/amide ABC transporter membrane protein 2, HAAT family        | -4.30 | 9.30E-06    | 6.87E-04    |
| Pden_4796 |             | amino acid/amide ABC transporter membrane protein 1, HAAT family        | -5.15 | 5.47E-05    | 9.01E-04    |
| Pden_4797 |             | amino acid/amide ABC transporter substrate-binding protein, HAAT family | -5.29 | 5.58E-05    | 9.01E-04    |
| Pden_4798 | <i>paaN</i> | phenylacetic acid degradation protein paaN                              | -1.81 | 3.42E-04    | 0.002238614 |
| Pden_4799 | <i>paaB</i> | Enoyl-CoA hydratase / short chain enoyl-CoA hydratase                   | -2.10 | 7.14E-04    | 0.00340186  |
| Pden_4800 | <i>paaI</i> | phenylacetic acid degradation protein PaaD                              | -4.35 | 0.001495407 | 0.005538586 |
| Pden_4801 | <i>paaF</i> | phenylacetate-CoA ligase                                                | -4.58 | 2.86E-05    | 7.03E-04    |
| Pden_4803 |             | adenylyltransferase                                                     | 1.37  | 0.001383075 | 0.005219358 |
| Pden_4804 | <i>paaZ</i> | phenylacetic acid degradation protein paaN                              | -1.45 | 0.003047962 | 0.009099135 |
| Pden_4805 |             | phenylacetic acid catabolic family protein                              | -1.79 | 9.59E-04    | 0.004097841 |
| Pden_4806 | <i>paaK</i> | phenylacetate-CoA oxygenase/reductase, PaaK subunit                     | -2.07 | 2.98E-04    | 0.002053033 |
| Pden_4807 | <i>paaJ</i> | phenylacetate-CoA oxygenase, PaaJ subunit                               | -2.23 | 1.31E-04    | 0.001314735 |
| Pden_4809 | <i>paaB</i> | phenylacetate-CoA oxygenase, PaaH subunit                               | -2.85 | 0.001173841 | 0.004659024 |
| Pden_4810 | <i>paaA</i> | phenylacetate-CoA oxygenase, PaaG subunit                               | -2.32 | 9.09E-05    | 0.001090128 |
| Pden_4813 |             | Penicillin amidase                                                      | -2.76 | 2.20E-04    | 0.001708297 |
| Pden_4814 |             | conserved hypothetical protein                                          | -2.58 | 6.29E-05    | 9.34E-04    |
| Pden_4815 |             | conserved hypothetical protein                                          | -2.10 | 6.82E-05    | 9.60E-04    |
| Pden_4816 |             | TRAP C4-dicarboxylate transport system permease DctM subunit            | -2.08 | 5.66E-04    | 0.00297487  |
| Pden_4817 |             | TRAP dicarboxylate transporter, DctP subunit                            | -3.73 | 1.11E-05    | 6.87E-04    |
| Pden_4818 |             | transcriptional regulator, lclR family                                  | -2.75 | 0.00103422  | 0.004323912 |
| Pden_4819 |             | Thiolase                                                                | -2.79 | 1.27E-04    | 0.001289642 |
| Pden_4820 |             | AMP-dependent synthetase and ligase                                     | -2.03 | 0.001070605 | 0.00441142  |
| Pden_4821 |             | conserved hypothetical protein                                          | -1.77 | 0.002438271 | 0.00772043  |
| Pden_4822 |             | short-chain dehydrogenase/reductase SDR                                 | -2.33 | 9.95E-04    | 0.004206003 |
| Pden_4825 | <i>ftsH</i> | membrane protease FtsH catalytic subunit                                | 2.55  | 4.27E-05    | 8.32E-04    |
| Pden_4827 |             | TonB-dependent siderophore receptor                                     | 2.08  | 0.002543326 | 0.007983175 |
| Pden_4828 |             | ABC transporter related protein                                         | 3.04  | 5.16E-04    | 0.002802086 |
| Pden_4829 |             | periplasmic binding protein                                             | 2.71  | 1.73E-04    | 0.001509512 |
| Pden_4830 |             | transport system permease protein                                       | 2.85  | 6.01E-04    | 0.003082284 |
| Pden_4832 |             | negative transcriptional regulator                                      | 1.74  | 0.00318949  | 0.009410482 |
| Pden_4833 |             | transcriptional regulator, GntR family                                  | 1.62  | 2.83E-04    | 0.002009098 |
| Pden_4834 |             | transcriptional regulator, AraC family                                  | 2.19  | 8.55E-04    | 0.003825716 |
| Pden_4835 |             | major facilitator superfamily MFS_1                                     | 2.99  | 9.99E-05    | 0.001137092 |
| Pden_4837 |             | protein of unknown function DUF6, transmembrane                         | 2.81  | 1.64E-04    | 0.001498242 |
| Pden_4838 |             | conserved hypothetical protein                                          | 3.12  | 1.59E-04    | 0.001489115 |
| Pden_4848 |             | PfkB domain protein                                                     | 2.16  | 2.96E-04    | 0.002049708 |
| Pden_4850 |             | monosaccharide ABC transporter ATP-binding protein, CUT2 family         | 2.17  | 0.00314761  | 0.009308616 |
| Pden_4852 |             | peptidase C14, caspase catalytic subunit p20                            | 3.31  | 1.29E-04    | 0.001309795 |
| Pden_4854 |             | predicted aconitase subunit 1                                           | 2.22  | 3.44E-04    | 0.002238614 |
| Pden_4859 | <i>hypF</i> | proline racemase                                                        | -1.39 | 0.00307117  | 0.009162836 |
| Pden_4862 |             | amino acid ABC transporter membrane protein 2, PAAT family              | -1.69 | 1.68E-04    | 0.001505274 |
| Pden_4863 |             | amino acid ABC transporter membrane protein 1, PAAT family              | -2.76 | 3.32E-04    | 0.002212274 |
| Pden_4864 |             | amino acid ABC transporter substrate-binding protein, PAAT family       | -2.45 | 1.57E-05    | 6.87E-04    |
| Pden_4868 |             | transcriptional regulator, GntR family                                  | -1.20 | 0.002884602 | 0.008739141 |
| Pden_4871 | <i>proC</i> | pyrroline-5-carboxylate reductase                                       | 3.37  | 4.38E-04    | 0.002548142 |
| Pden_4872 |             | FAD linked oxidase domain protein                                       | 2.78  | 1.09E-04    | 0.001182514 |
| Pden_4876 |             | dihydropicolinate synthetase                                            | 1.84  | 0.001756021 | 0.006137651 |
| Pden_4877 |             | L-lactate dehydrogenase (cytochrome)                                    | 3.12  | 7.80E-04    | 0.003624521 |
| Pden_4878 |             | hydroxymethylglutaryl-CoA lyase                                         | 2.64  | 5.45E-05    | 9.01E-04    |
| Pden_4879 |             | L-carnitine dehydratase/bile acid-inducible protein F                   | 2.54  | 3.19E-05    | 7.09E-04    |
| Pden_4882 |             | binding-protein-dependent transport systems inner membrane component    | 3.99  | 6.21E-06    | 6.87E-04    |

|           |              |                                                                                 |       |             |             |
|-----------|--------------|---------------------------------------------------------------------------------|-------|-------------|-------------|
| Pden_4883 |              | ABC transporter related protein                                                 | 5.15  | 1.63E-04    | 0.001495531 |
| Pden_4890 |              | acyl-CoA dehydrogenase domain protein                                           | 1.55  | 7.92E-04    | 0.003644887 |
| Pden_4892 |              | MmgE/PrpD family protein                                                        | 1.72  | 9.37E-04    | 0.004043846 |
| Pden_4894 |              | FAD dependent oxidoreductase                                                    | 1.69  | 3.11E-04    | 0.002120675 |
| Pden_4895 |              | BFD domain protein (2Fe-2S)-binding domain protein                              | 2.64  | 1.34E-04    | 0.001332604 |
| Pden_4896 |              | oxidoreductase FAD/NAD(P)-binding domain protein                                | 1.95  | 3.25E-04    | 0.002189096 |
| Pden_4900 |              | conserved hypothetical protein                                                  | 1.31  | 0.001239463 | 0.004844257 |
| Pden_4901 |              | luciferase family protein                                                       | 1.91  | 0.001246164 | 0.004857065 |
| Pden_4902 |              | ABC transporter related protein                                                 | 2.85  | 7.17E-06    | 6.87E-04    |
| Pden_4903 |              | binding-protein-dependent transport systems inner membrane component            | 2.16  | 3.60E-05    | 7.62E-04    |
| Pden_4906 |              | Sarcosine oxidase, gamma subunit                                                | 1.36  | 0.00179523  | 0.006242616 |
| Pden_4907 |              | sarcosine oxidase, alpha subunit family                                         | 1.30  | 0.002687887 | 0.008277841 |
| Pden_4910 |              | transcriptional regulator, AraC family with amidase-like domain                 | 1.69  | 0.001896485 | 0.006500951 |
| Pden_4911 |              | extracellular solute-binding protein                                            | -2.33 | 0.002022886 | 0.006814284 |
| Pden_4918 |              | hypothetical protein                                                            | 3.22  | 0.001622733 | 0.005840986 |
| Pden_4919 | <i>map</i>   | methionine aminopeptidase, type I                                               | 1.40  | 5.80E-04    | 0.003020791 |
| Pden_4920 |              | hypothetical protein                                                            | 2.54  | 7.96E-05    | 0.001019694 |
| Pden_4921 |              | alpha/beta hydrolase fold protein                                               | 1.39  | 4.60E-04    | 0.002626498 |
| Pden_4922 |              | conserved hypothetical protein                                                  | 2.93  | 3.61E-05    | 7.62E-04    |
| Pden_4923 |              | transcriptional regulator, lclR family                                          | 1.35  | 0.002569375 | 0.00802847  |
| Pden_4929 |              | 2-keto-3-deoxygalactonate kinase                                                | 1.44  | 0.001200498 | 0.004728881 |
| Pden_4930 |              | 2-keto-3-deoxy-phosphogalactonate aldolase                                      | 1.76  | 3.38E-04    | 0.002227917 |
| Pden_4932 |              | short-chain dehydrogenase/reductase SDR                                         | 1.71  | 5.89E-04    | 0.003052963 |
| Pden_4933 |              | conserved hypothetical protein                                                  | 2.60  | 6.59E-04    | 0.003246886 |
| Pden_4934 |              | BFD domain protein (2Fe-2S)-binding domain protein                              | 2.71  | 4.37E-04    | 0.002545539 |
| Pden_4935 |              | hypothetical protein                                                            | 1.86  | 2.34E-04    | 0.001760831 |
| Pden_4941 |              | Betaine-aldehyde dehydrogenase                                                  | -1.74 | 4.39E-04    | 0.00254936  |
| Pden_4942 |              | thiamine pyrophosphate enzyme domain protein TPP-binding protein                | -1.57 | 3.58E-04    | 0.002285725 |
| Pden_4943 |              | extracellular solute-binding protein, family 1                                  | -3.00 | 5.50E-04    | 0.002920173 |
| Pden_4947 |              | protein of unknown function DUF1127                                             | 2.09  | 0.002517515 | 0.007926729 |
| Pden_4948 |              | hypothetical protein                                                            | 1.68  | 5.13E-04    | 0.002791657 |
| Pden_4951 |              | NADH:flavin oxidoreductase/NADH oxidase                                         | 2.10  | 2.65E-05    | 7.01E-04    |
| Pden_4956 |              | FAD dependent oxidoreductase                                                    | 2.06  | 0.00278022  | 0.008505288 |
| Pden_4987 |              | RNA polymerase, sigma 54 subunit, RpoN/SigL                                     | 2.05  | 3.11E-04    | 0.002120136 |
| Pden_4988 |              | protein of unknown function UPF0118                                             | 1.19  | 0.00205509  | 0.006885889 |
| Pden_4996 |              | CoA-binding domain protein                                                      | -1.75 | 0.001387948 | 0.005229852 |
| Pden_4997 |              | amino acid/amide ABC transporter ATP-binding protein 2, HAAT family             | -2.15 | 8.96E-04    | 0.003925308 |
| Pden_4999 |              | amino acid/amide ABC transporter membrane protein 2, HAAT family                | -2.21 | 5.36E-04    | 0.002869505 |
| Pden_5000 |              | amino acid/amide ABC transporter membrane protein 1, HAAT family                | -1.96 | 2.21E-04    | 0.001709064 |
| Pden_5001 |              | HupE/UreJ protein                                                               | 1.86  | 3.81E-04    | 0.002323045 |
| Pden_5002 |              | Rhodanese domain protein                                                        | 2.12  | 4.16E-05    | 8.27E-04    |
| Pden_5003 |              | Cupin 2, conserved barrel domain protein                                        | 1.81  | 0.001717306 | 0.006050604 |
| Pden_5004 | <i>ssuB2</i> | ABC transporter related protein                                                 | 2.75  | 7.64E-05    | 0.001002704 |
| Pden_5005 |              | binding-protein-dependent transport systems inner membrane component            | 2.91  | 2.30E-04    | 0.001743438 |
| Pden_5006 |              | aliphatic sulfonates family ABC transporter, periplasmic ligand-binding protein | 2.56  | 3.72E-05    | 7.78E-04    |
| Pden_5007 |              | monooxygenase, NtaA/SnaA/SoxA family                                            | 3.03  | 1.95E-05    | 6.87E-04    |
| Pden_5008 |              | copper resistance protein CopC                                                  | 4.80  | 0.001363237 | 0.005166067 |
| Pden_5009 |              | nuclear export factor GLE1                                                      | 4.59  | 0.002671695 | 0.008248045 |
| Pden_5010 |              | ABC transporter related protein                                                 | 3.51  | 5.52E-04    | 0.002925581 |
| Pden_5011 |              | binding-protein-dependent transport systems inner membrane component            | 2.83  | 4.30E-05    | 8.34E-04    |
| Pden_5012 |              | ABC transporter substrate-binding protein                                       | 3.19  | 3.01E-04    | 0.002073566 |
| Pden_5013 |              | Alkanesulfonate monooxygenase                                                   | 2.79  | 7.70E-05    | 0.001002704 |
| Pden_5014 |              | Acyl-CoA dehydrogenase, type 2, C-terminal domain                               | 3.63  | 1.75E-04    | 0.001517116 |
| Pden_5015 |              | hypothetical protein                                                            | 3.70  | 5.94E-05    | 9.17E-04    |
| Pden_5016 |              | serine O-acetyltransferase                                                      | 3.37  | 6.64E-05    | 9.49E-04    |
| Pden_5017 |              | conserved hypothetical protein                                                  | 3.20  | 1.27E-05    | 6.87E-04    |
| Pden_5018 |              | Hydroxypyruvate isomerase                                                       | 2.04  | 3.33E-04    | 0.002219207 |
| Pden_5019 |              | transcriptional regulator, lclR family                                          | 1.75  | 6.09E-04    | 0.003105221 |
| Pden_5021 |              | 3-oxoadipate CoA-transferase beta subunit                                       | 2.19  | 1.57E-04    | 0.00147988  |
| Pden_5022 | <i>pcaF</i>  | 3-oxoadipyl-CoA thiolase                                                        | 2.16  | 7.32E-05    | 9.81E-04    |
| Pden_5023 |              | NAD-dependent epimerase/dehydratase                                             | 2.83  | 1.75E-05    | 6.87E-04    |
| Pden_5024 |              | hypothetical protein                                                            | 3.50  | 6.50E-05    | 9.41E-04    |
| Pden_5026 |              | hypothetical protein                                                            | 2.23  | 8.86E-05    | 0.001071179 |
| Pden_5030 |              | hypothetical protein                                                            | 1.80  | 1.72E-04    | 0.001509512 |
| Pden_5034 |              | initiator RepB protein                                                          | 2.44  | 1.73E-05    | 6.87E-04    |
| Pden_5037 |              | ABC transporter related protein                                                 | 1.85  | 7.79E-04    | 0.003619497 |
| Pden_5039 |              | ABC-2 type transporter                                                          | 1.66  | 0.00177002  | 0.006171016 |
| Pden_5040 |              | glycosyl transferase, group 1                                                   | 1.29  | 8.22E-04    | 0.003744016 |
| Pden_5041 |              | hypothetical protein                                                            | 3.55  | 6.31E-06    | 6.87E-04    |
| Pden_5043 |              | UDP-galactopyranose mutase                                                      | 1.53  | 0.002290154 | 0.007366284 |
| Pden_5045 |              | (S)-2-hydroxy-acid oxidase                                                      | 1.10  | 0.001182419 | 0.004676252 |
| Pden_5048 |              | ABC transporter related protein                                                 | -1.84 | 0.00133552  | 0.005087838 |
| Pden_5049 |              | binding-protein-dependent transport systems inner membrane component            | -1.31 | 0.001923337 | 0.006575189 |
| Pden_5055 |              | ABC-2 type transporter                                                          | 2.08  | 4.42E-04    | 0.00255247  |
| Pden_5056 |              | ABC transporter related protein                                                 | 2.71  | 1.12E-04    | 0.001190496 |
| Pden_5058 |              | transcriptional regulator, TetR family                                          | 2.32  | 5.34E-04    | 0.002868014 |
| Pden_5059 |              | 2-keto-3-deoxygluconate kinase                                                  | 2.69  | 5.04E-05    | 9.00E-04    |
| Pden_5060 |              | Mannitol dehydrogenase, C-terminal domain                                       | 2.50  | 6.39E-04    | 0.003190877 |
| Pden_5061 | <i>uxuA</i>  | D-mannonate dehydratase                                                         | 1.75  | 1.73E-04    | 0.001509512 |
| Pden_5083 |              | D-isomer specific 2-hydroxyacid dehydrogenase, NAD-binding protein              | 1.37  | 0.003328027 | 0.009722909 |
| Pden_5084 |              | 2-keto-3-deoxygluconate kinase                                                  | 2.55  | 1.38E-04    | 0.001357699 |
| Pden_5085 |              | hydratase/decarboxylase family protein                                          | 3.54  | 2.90E-05    | 7.04E-04    |
| Pden_5095 |              | amino acid/amide ABC transporter substrate-binding protein, HAAT family         | -1.96 | 0.002861847 | 0.00868677  |
| Pden_5101 |              | conserved hypothetical protein                                                  | 1.46  | 3.72E-04    | 0.002309828 |
| Pden_5110 |              | putative signal-transduction protein with CBS domains                           | 1.71  | 1.71E-04    | 0.001509512 |
| Pden_5115 |              | conserved hypothetical protein                                                  | 4.02  | 1.51E-05    | 6.87E-04    |
| Pden_5117 |              | protein of unknown function DUF1234                                             | 3.37  | 3.34E-04    | 0.002224238 |

|           |                                                                      |      |             |             |
|-----------|----------------------------------------------------------------------|------|-------------|-------------|
| Pden_5118 | conserved hypothetical protein                                       | 3.03 | 1.61E-04    | 0.001491729 |
| Pden_5119 | NADPH-dependent FMN reductase                                        | 3.04 | 1.31E-05    | 6.87E-04    |
| Pden_5120 | hypothetical protein                                                 | 3.00 | 2.80E-05    | 7.03E-04    |
| Pden_5121 | hypothetical protein                                                 | 2.87 | 4.42E-05    | 8.44E-04    |
| Pden_5124 | hypothetical protein                                                 | 2.38 | 0.002704783 | 0.008311152 |
| Pden_5125 | putative monooxygenase protein                                       | 2.72 | 4.00E-05    | 8.15E-04    |
| Pden_5126 | binding-protein-dependent transport systems inner membrane component | 2.84 | 6.03E-04    | 0.003082284 |
| Pden_5127 | transcriptional regulator, Fis family                                | 2.95 | 2.78E-04    | 0.001988805 |
| Pden_5128 | ABC transporter related protein                                      | 3.08 | 7.55E-04    | 0.0035394   |
| Pden_5129 | RNA polymerase, sigma-24 subunit, ECF subfamily                      | 1.25 | 0.002426195 | 0.007691814 |
| Pden_5131 | TonB-dependent siderophore receptor                                  | 2.42 | 5.90E-05    | 9.13E-04    |
| Pden_5132 | efflux transporter, RND family, MFP subunit                          | 4.58 | 4.06E-05    | 8.15E-04    |
| Pden_5133 | <i>macB3</i> ABC transporter related protein                         | 4.75 | 1.08E-04    | 0.001177715 |

Table S5. Protein identification by MALDI-TOF MS with MASCOT search.

| Band | Gene      | Protein identification                                            | Mass (Da) | E-value | Localization |
|------|-----------|-------------------------------------------------------------------|-----------|---------|--------------|
| A    | Pden_0569 | succinate dehydrogenase flavoprotein subunit                      | 66,031    | 1.4e-15 | IM           |
| B    | Pden_0425 | electron transfer flavoprotein-ubiquinone oxidoreductase (ETF-QO) | 59,659    | 4.4e-8  | IM           |
| C    | Pden_3816 | ATP synthase F1 subcomplex alpha subunit                          | 55,062    | 3.5e-10 | IM           |
| C    | Pden_3818 | ATP synthase F1 subcomplex beta subunit                           | 50,308    | 3.5e-10 | IM           |
| D    | Pden_2763 | outer membrane porin                                              | 40,551    | 4.4e-5  | OM           |

Fig. S1

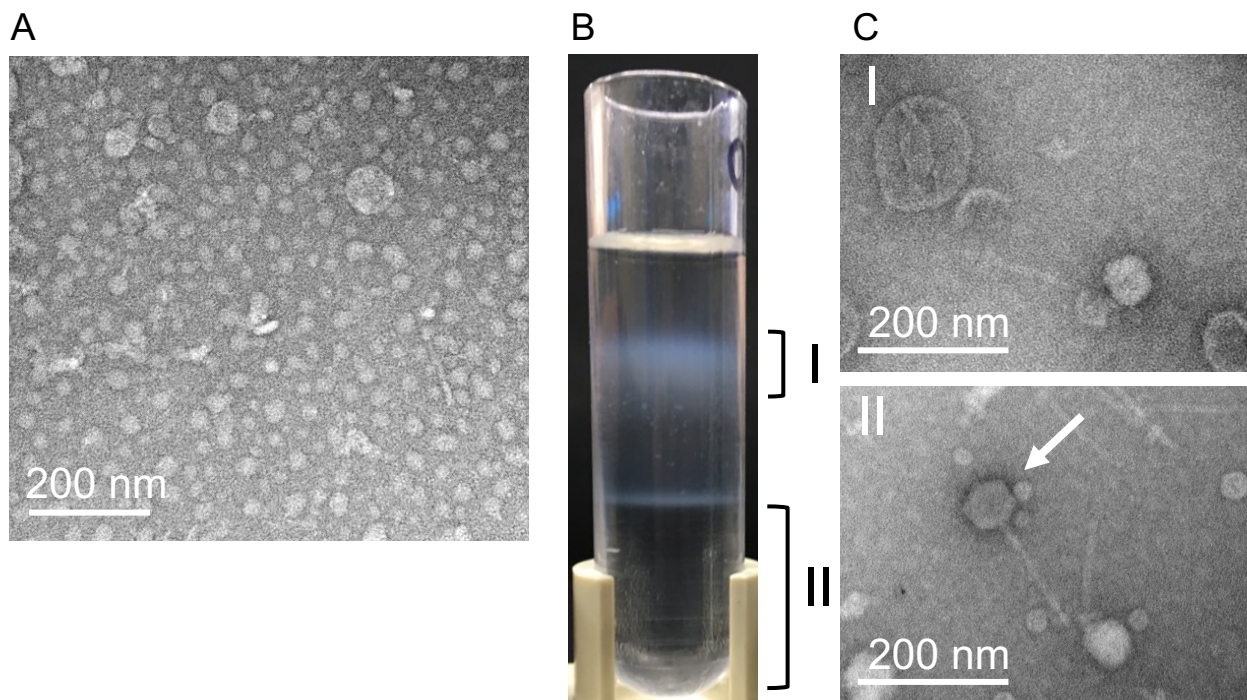

Fig. S1, Yasuda Marina *et al.*

Fig. S2

A

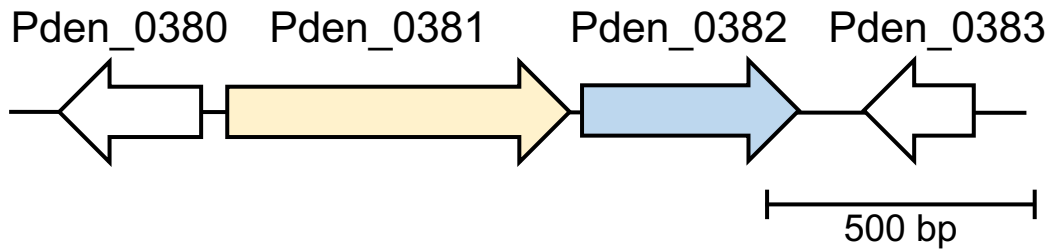

B

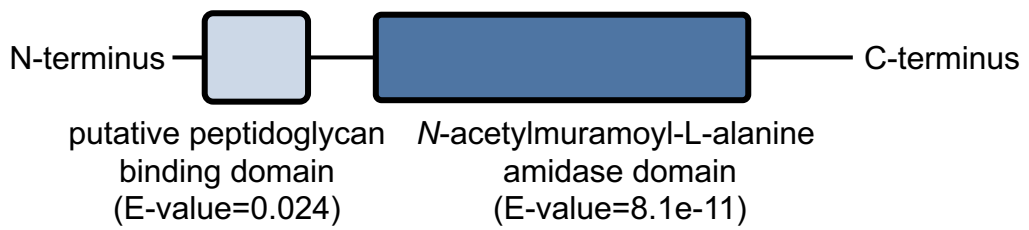

C

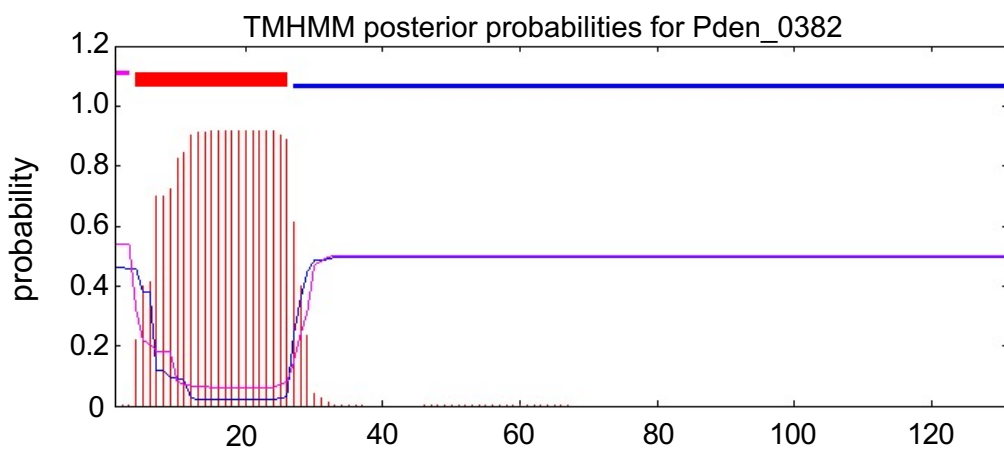

Fig. S3

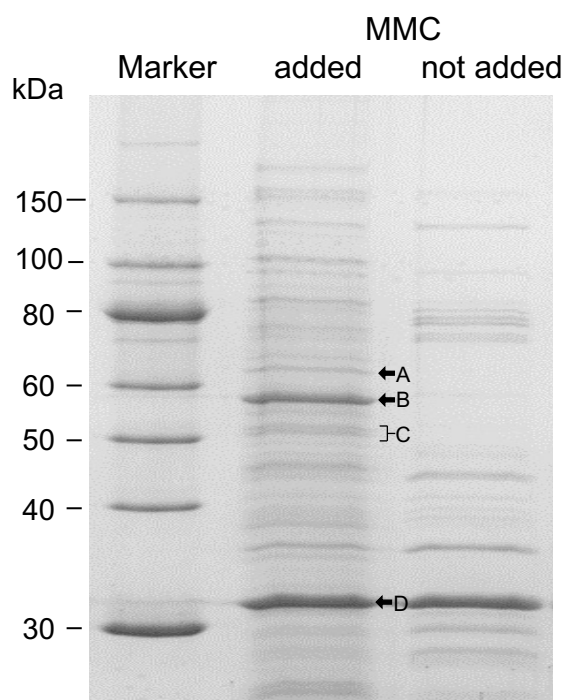

Fig. S3, Yasuda Marina *et al.*



Fig. S4

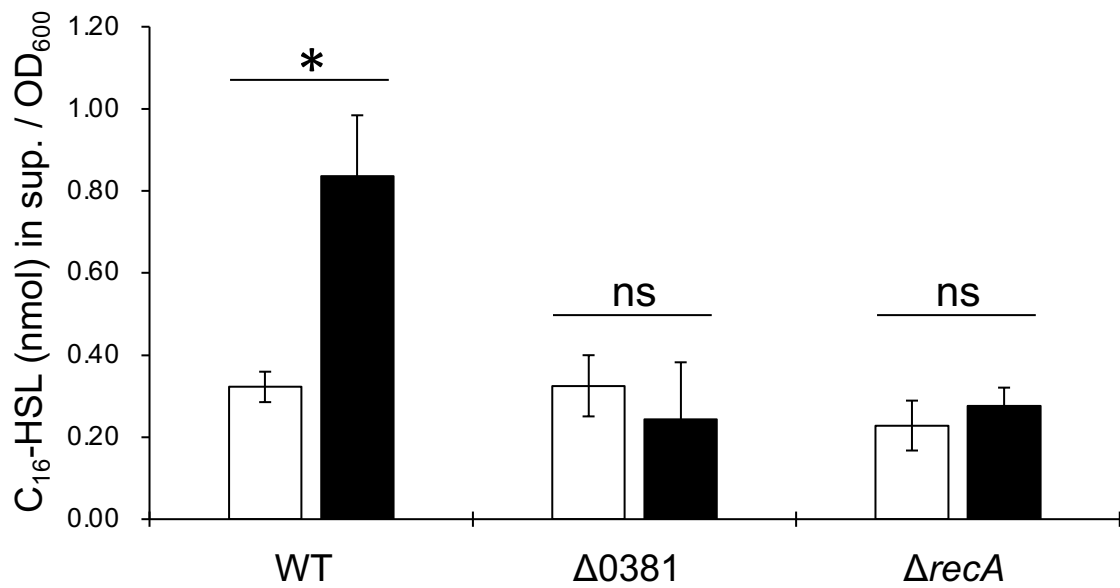

**Table S1. List of strains and plasmids used in this study.**

**Table S2. Sequences of primers used in this study.**

**Table S3. List of differentially expressed genes between WT with mitomycin C (MMC) vs. WT without MMC.**

For the differentially expressed genes ( $\log_2\text{FC} > 1$  or  $\log_2\text{FC} < -1$ ;  $\text{FDR} < 0.01$ ) in WT, the following information is given: gene name (based on uniplot or refseq), product, prophage region predicted by *PhiSpy*,  $\log_2$  fold change ( $\log_2\text{FC}$ ),  $p$ -value, and false discovery rate (FDR).

**Table S4. List of differentially expressed genes between  $\Delta recA$  with MMC vs.  $\Delta recA$  without MMC.**

For the differentially expressed genes ( $\log_2\text{FC} > 1$  or  $\log_2\text{FC} < -1$ ;  $\text{FDR} < 0.01$ ) in  $\Delta recA$ , the following information is given: gene name (based on uniplot or refseq), product, prophage region predicted by *PhiSpy*,  $\log_2$  fold change ( $\log_2\text{FC}$ ),  $p$ -value, and false discovery rate (FDR).

**Table S5. Protein identification via MALDI-TOF MS with MASCOT search.**

**Movie 1. MV release through cell lysis.**

**Fig. S1. Phage is released with MVs under DNA-damaging stress.**

(A) TEM image of the crude MV fraction from MMC-treated WT of *P. denitrificans* Pd1222.

(B) TEM image after density gradient centrifugation of the crude MV fraction. The white arrow indicates phage particles.

**Fig. S2. Pden\_0381 and Pden\_0382 are candidates for endolysin and holin in *P. denitrificans* Pd1222.**

(A) Gene loci of Pden\_0381 and Pden\_0382. (B) Motif domain of Pden\_0381-coding protein analyzed using KEGG. (C) Transmembrane domain of the Pden\_0382-coding protein predicted using the TMHMM Web server.

**Fig. S3. Protein profiles of MVs produced with or without MMC.**

Approximately 5 µg of protein was separated on a 12% SDS-PAGE gel and stained with Coomassie Brilliant Blue. Band A, succinate dehydrogenase flavoprotein subunit; Band B, electron transfer flavoprotein-ubiquinone oxidoreductase (ETF-QO); Band C, ATP synthase F1 subcomplex alpha subunit and ATP synthase F1 subcomplex beta subunit; Band D, outer membrane porin.

**Fig. S4. Pden\_0381 allows *P. denitrificans* Pd1222 to release C16-HSL extracellularly in response to MMC.**

C16-HSL bioassay using the *C. violaceum* reporter strain in the total supernatant of *P. denitrificans* Pd1222 cultures with or without MMC. C16-HSL concentration in the total supernatant was determined with the aid of *C. violaceum* VIR24/pPROBE-PvioA-gfp, without C16-HSL extraction.  $n=3$ ; mean $\pm$ s.d. \*:  $p<0.05$ , ns:  $p\geq 0.05$  (Welch's *t*-test).

## References

- Devries, G.E., Harms, N., Hoogendijk, J., Stouthamer, A.H. (1989). Isolation and characterization of *Paracoccus denitrificans* mutants with increased conjugation frequencies and pleiotropic loss of a (nGATCn) DNA-modifying property. *Arch Microbiol* **152**: 52-57.
- Kaczmarczyk, A., Vorholt, J.A., Francez-Charlot, A. (2013). Cumate-inducible gene expression system for sphingomonads and other Alphaproteobacteria. *Appl Environ Microbiol* **79**: 6795-6802.
- Schäfer, A., Tauch, A., Jäger, W., Kalinowski, J., Thierbach, G., Pühler, A. (1994). Small mobilizable multi-purpose cloning vectors derived from the *Escherichia coli* plasmids pK18 and pK19: selection of defined deletions in the chromosome of *Corynebacterium glutamicum*. *Gene* **145**: 69-73.
- Simon, R., O'Connell, M., Labes, M., Pühler, A. (1986). Plasmid vector for the genetic analysis and manipulation of rhizobia and other gram-negative bacteria. *Methods Enzymol* **118**: 640-659.
- Someya, N., Morohoshi, T., Okano, N., Otsu, E., Usuki, K., Sayama, M. *et al.* (2009). Distribution of *N*-Acylhomoserine Lactone-Producing Fluorescent Pseudomonads in the Phyllosphere and Rhizosphere of Potato (*Solanum tuberosum* L.). *Microbes Environ* **24**:305-314.
- Toyofuku, M., Morinaga, K., Hashimoto, Y., Uhl, J., Shimamura, H., Inaba, H. *et al.* (2017). Membrane vesicle-mediated bacterial communication. *ISME J* **11**: 1504-1509.
